# Supplementary material for: Synthesis of N-heterocyclic carbene–PdCl2–(iso)quinoline complexes and their application in arylamination at low catalyst loadings
Source: Royal Society of Chemistry journal article supplement (doi:10.1039/c6ob00013d), 2016-01-01

## Supporting Information

### **Synthesis of *N*-heterocyclic carbene-PdCl<sub>2</sub>-(iso)quinoline complexes and their application in arylation at low catalyst loadings**

Feng Liu, Yi-Ran Zhu, Lu-Gan Song and Jian-Mei Lu\*

College of Chemistry and Materials Engineering, Wenzhou University, Chashan  
University Town, Wenzhou, Zhejiang Province, 325035 People's Republic of China

Fax: (+86)-577-86689300, E-mail: [ljm@wzu.edu.cn](mailto:ljm@wzu.edu.cn)

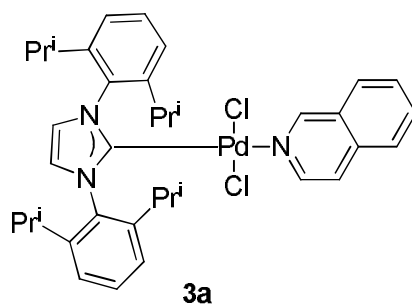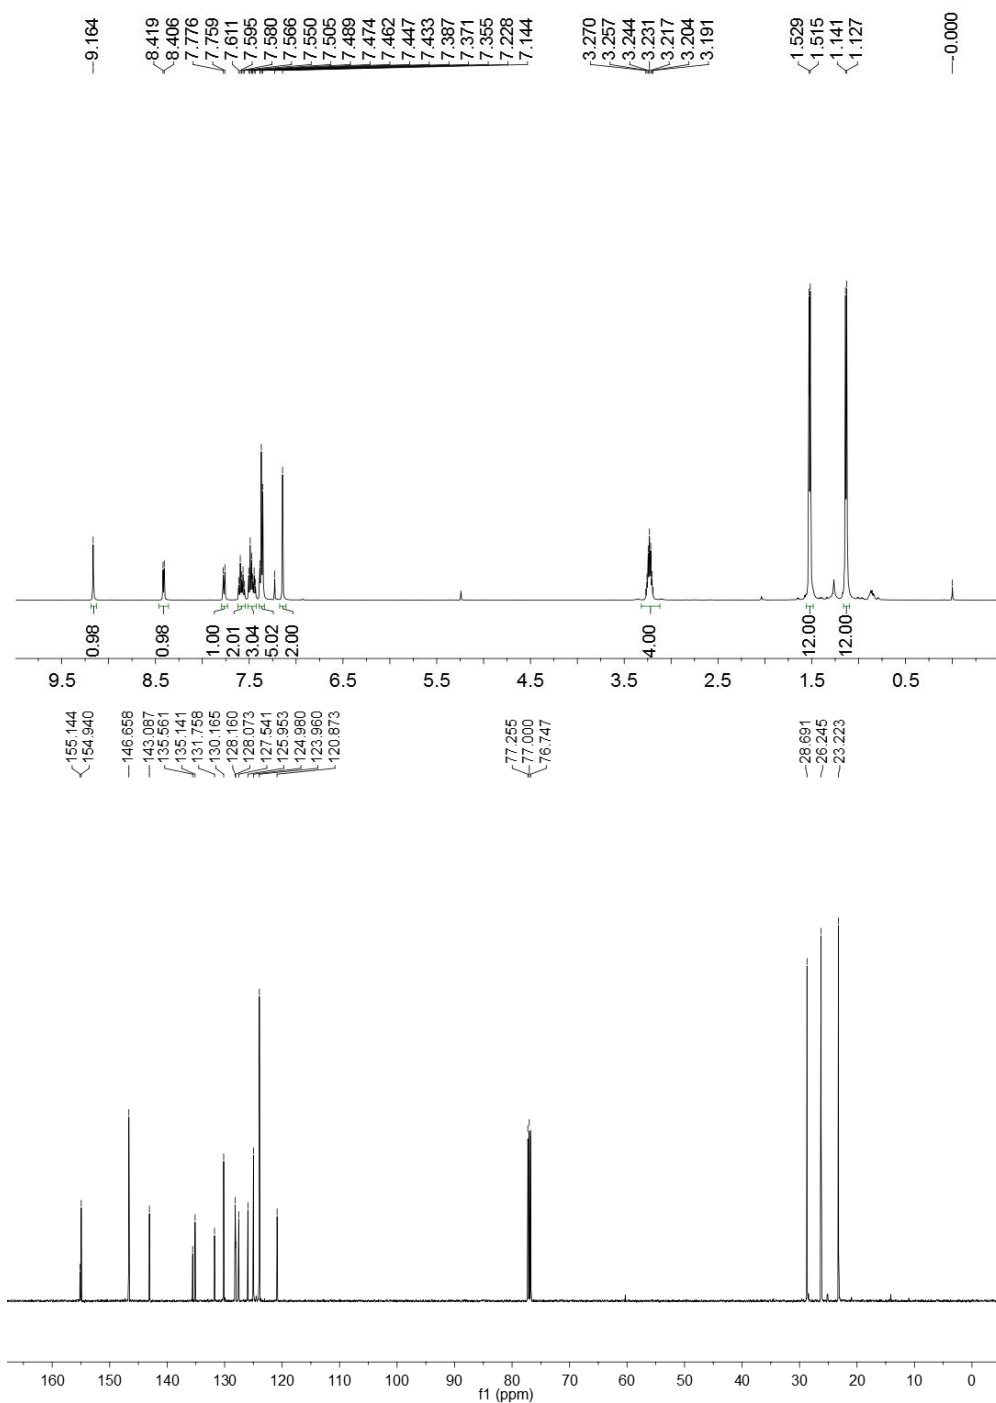

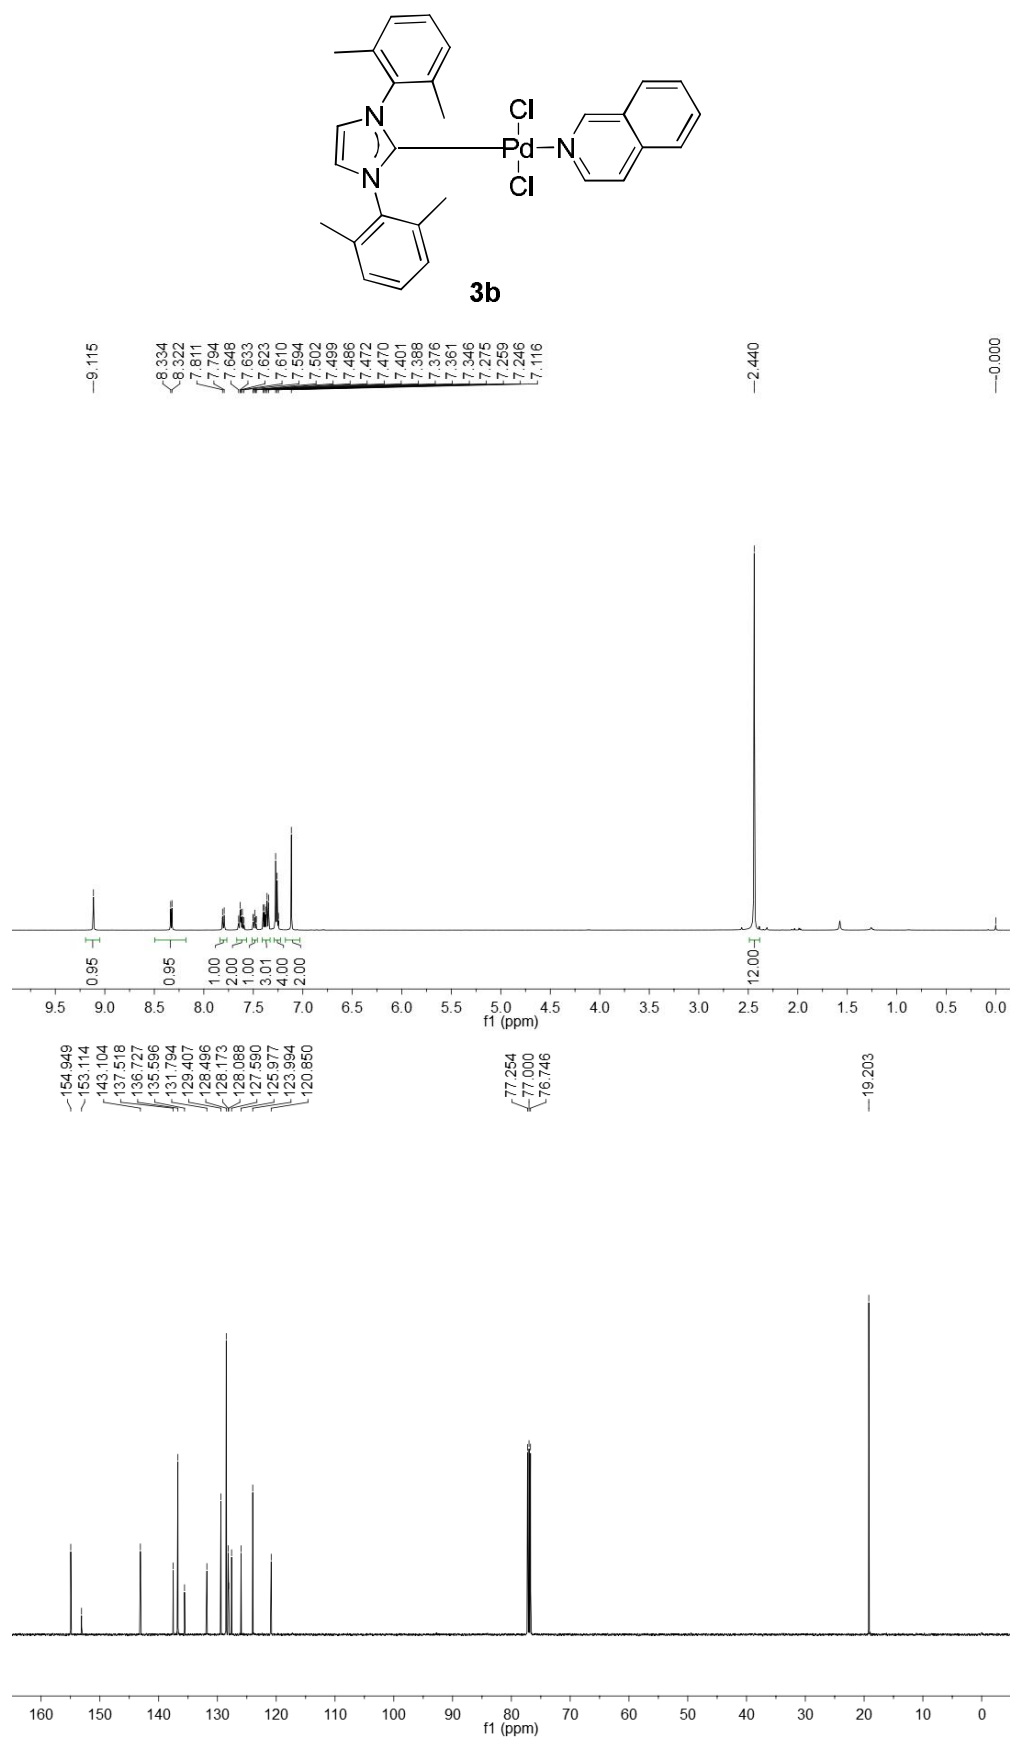

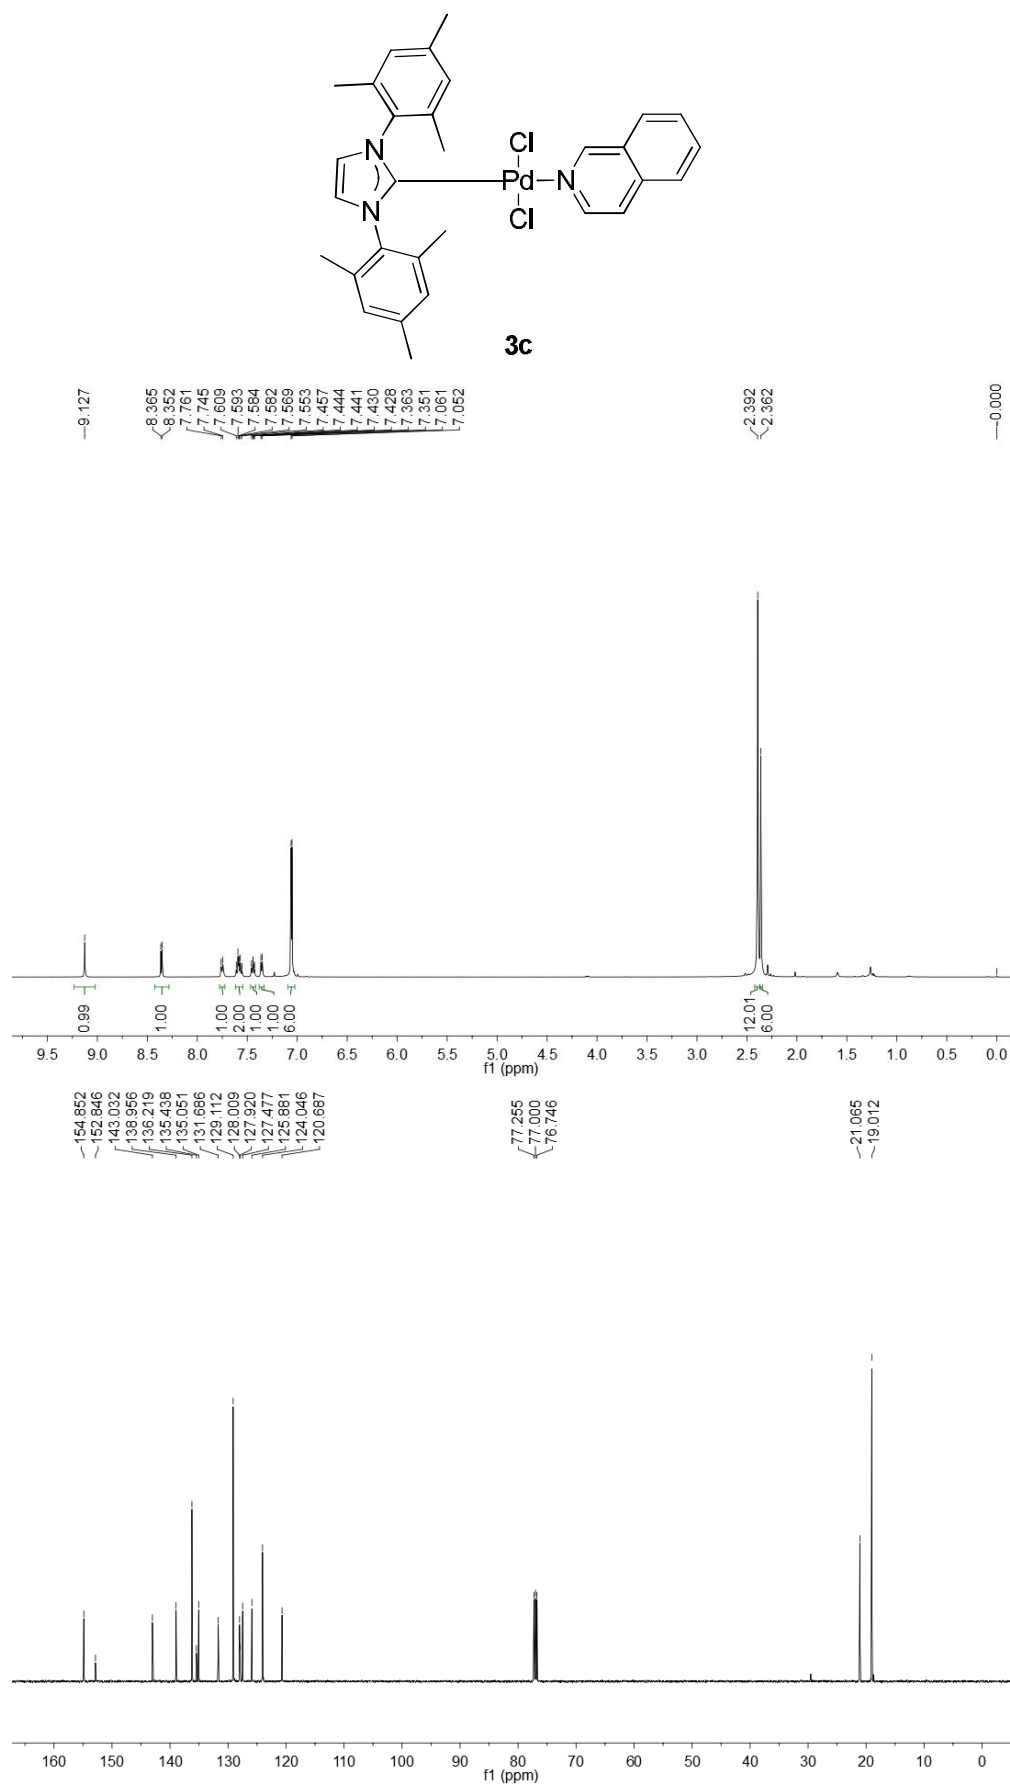



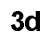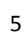

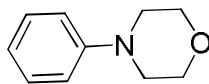

**4a**

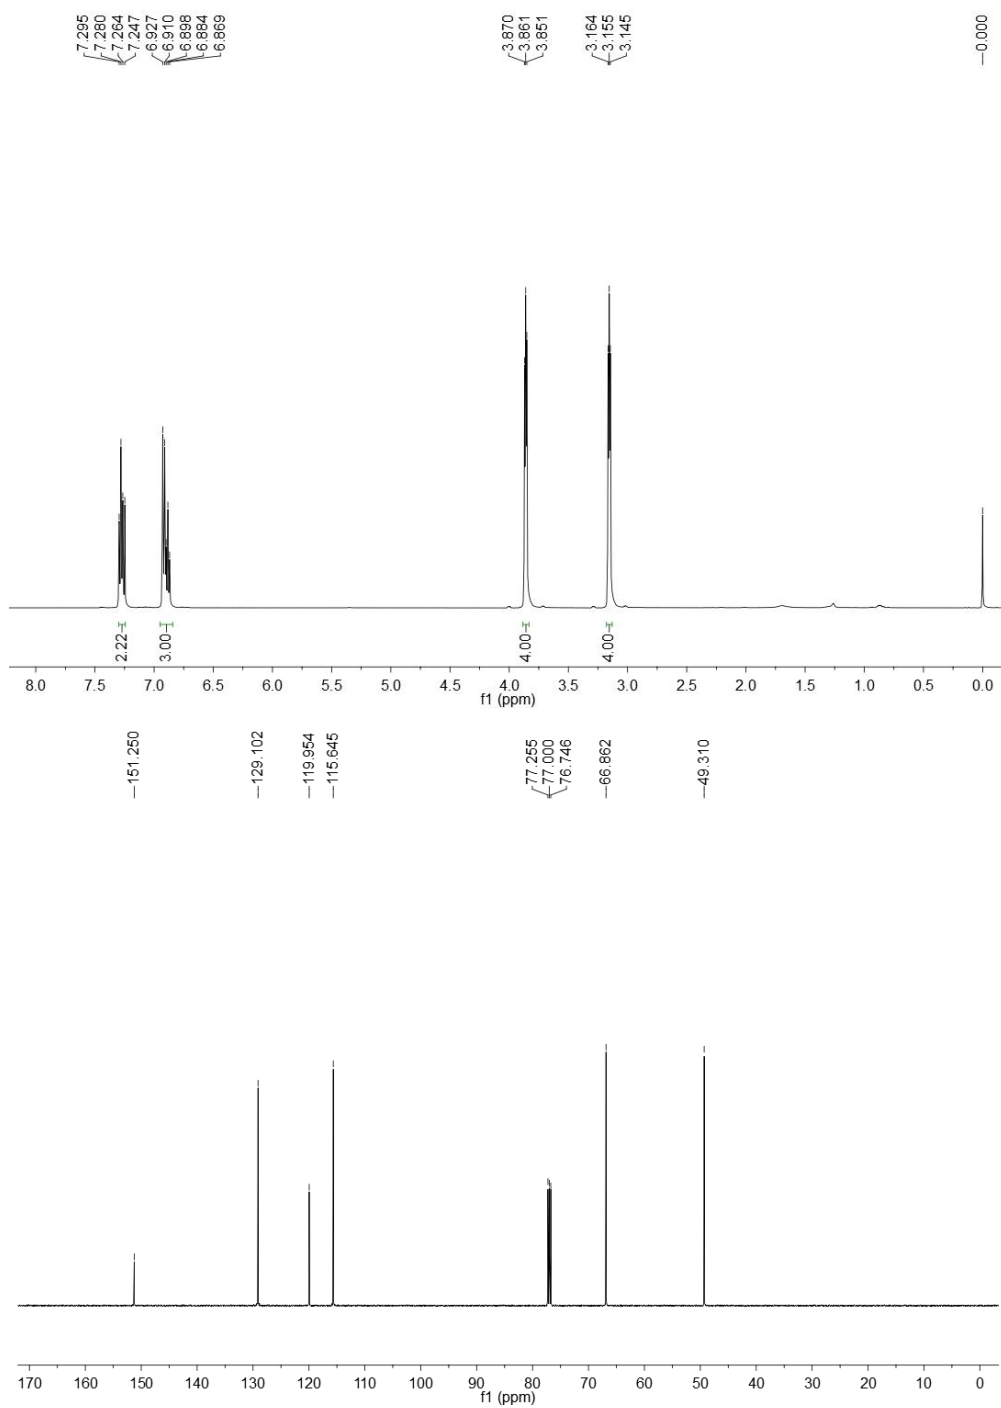

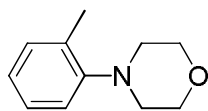

**4b**

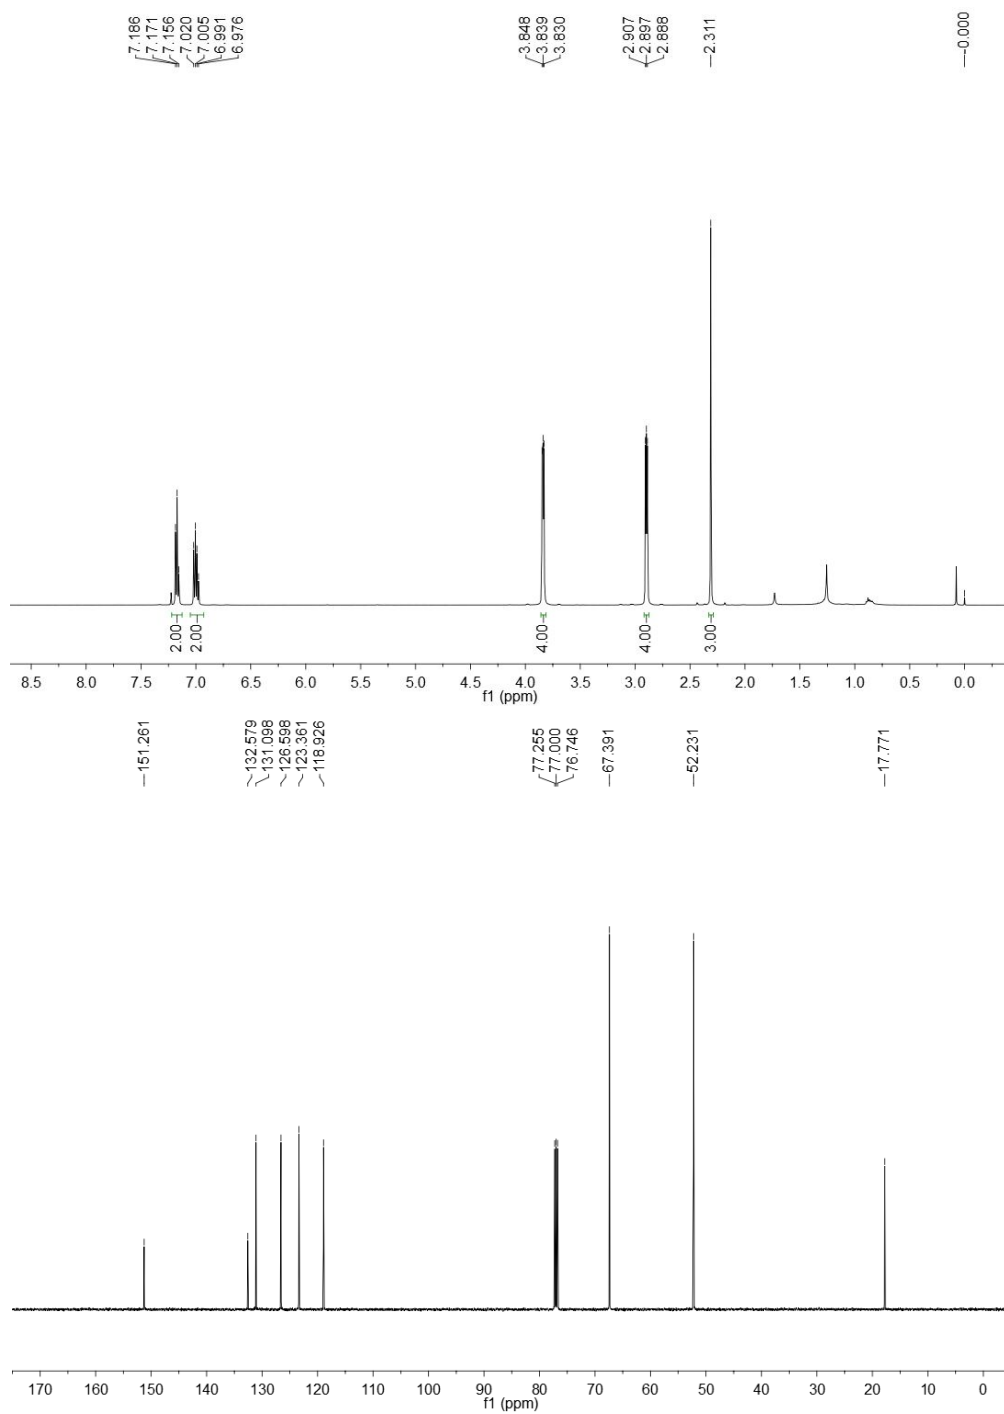

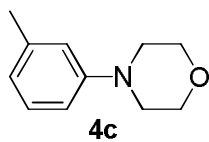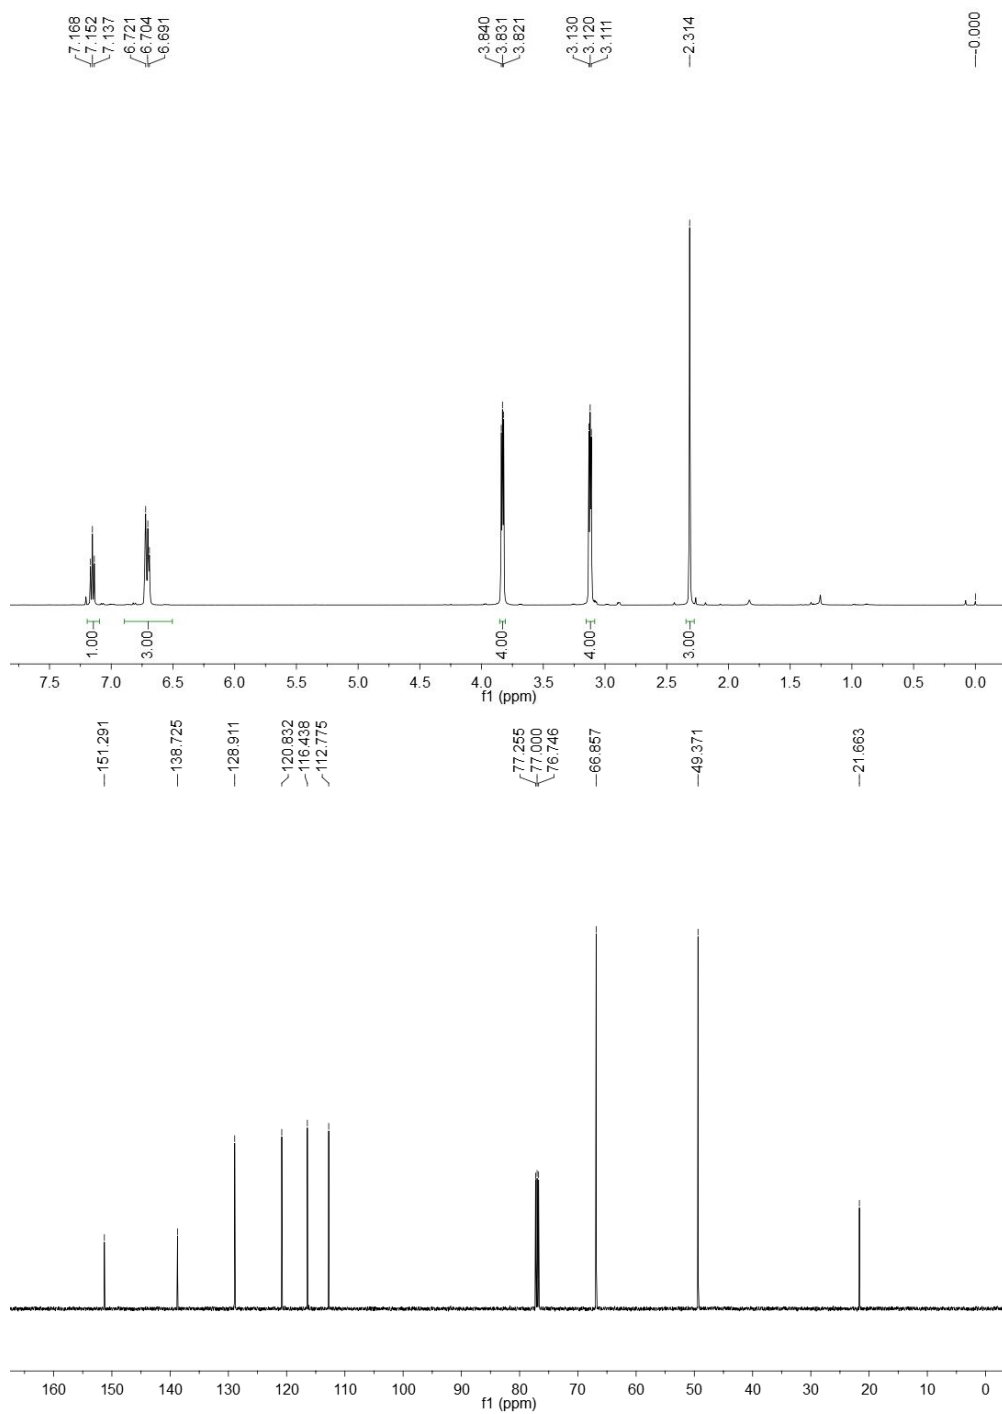

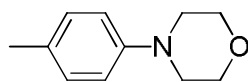

**4d**

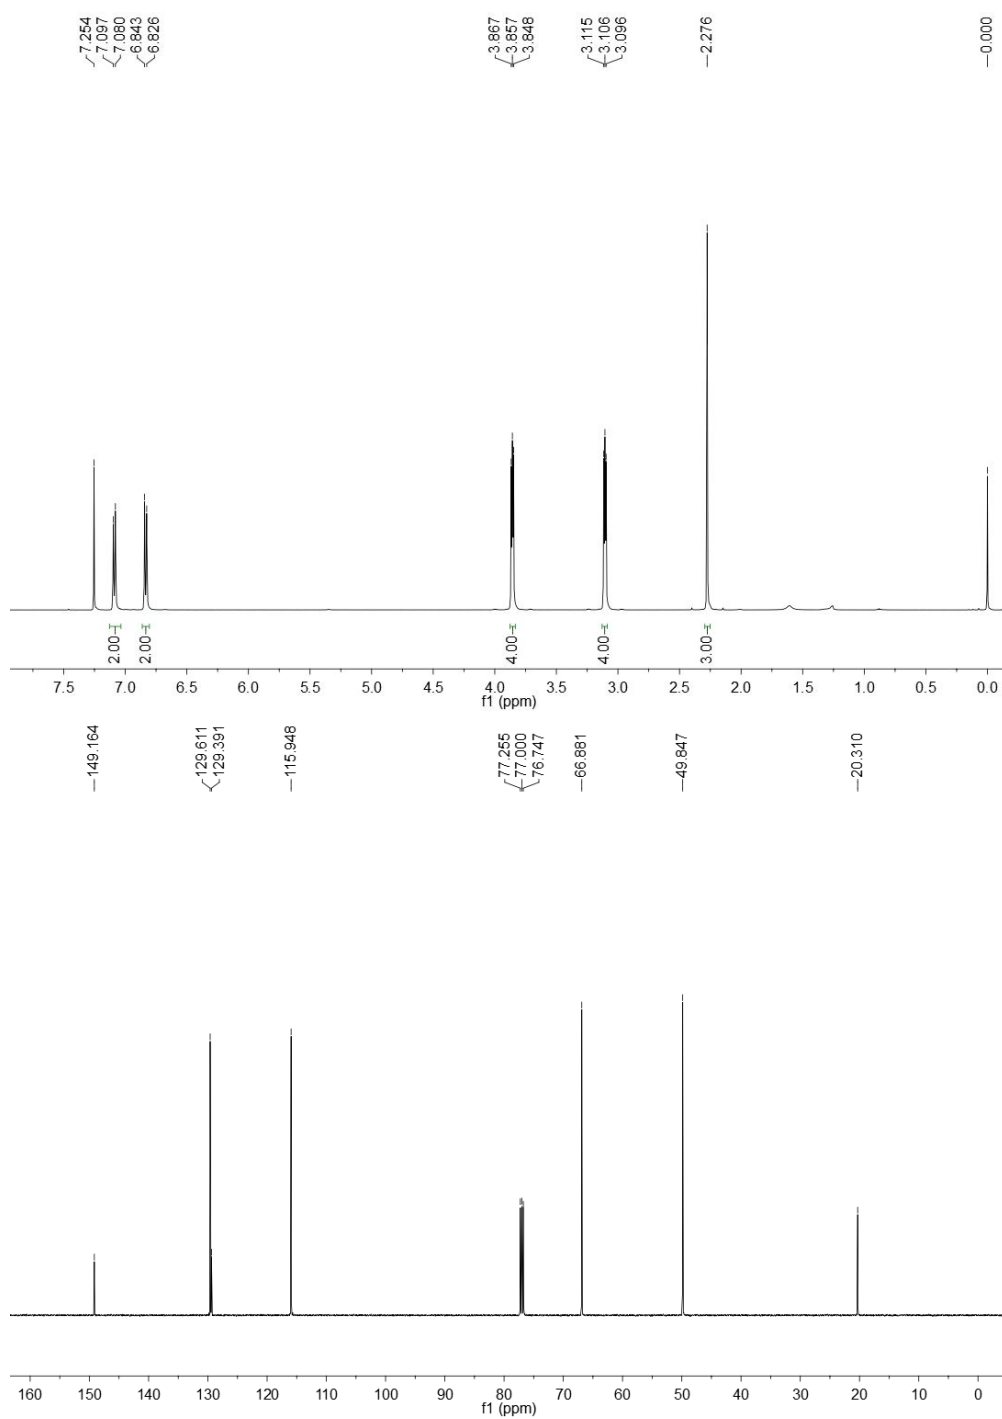

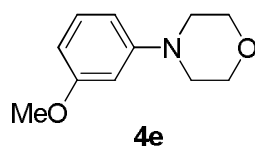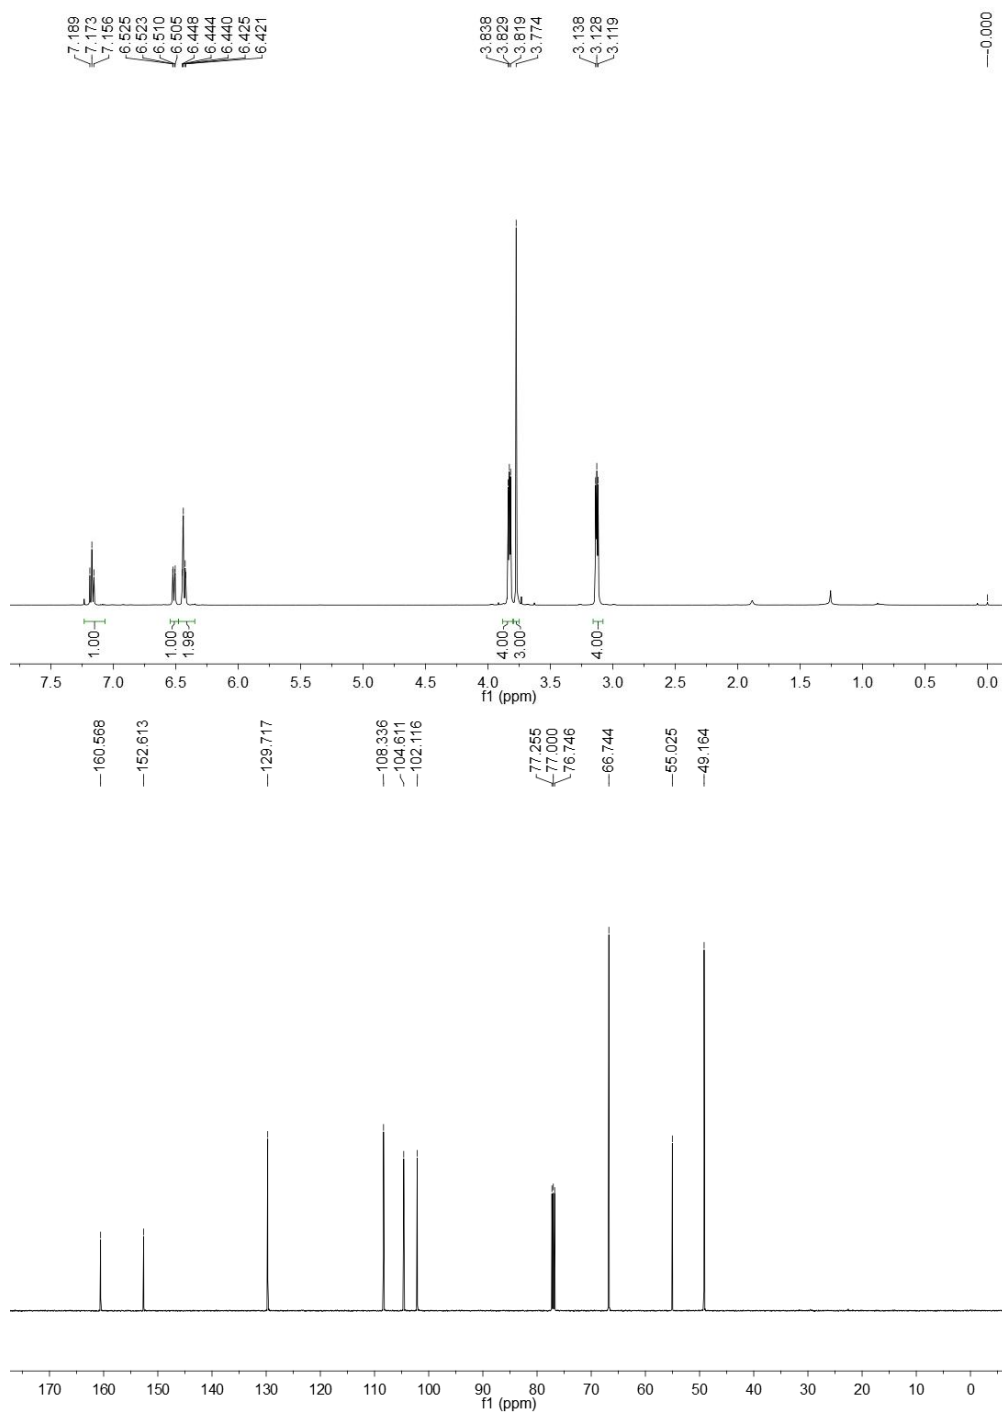

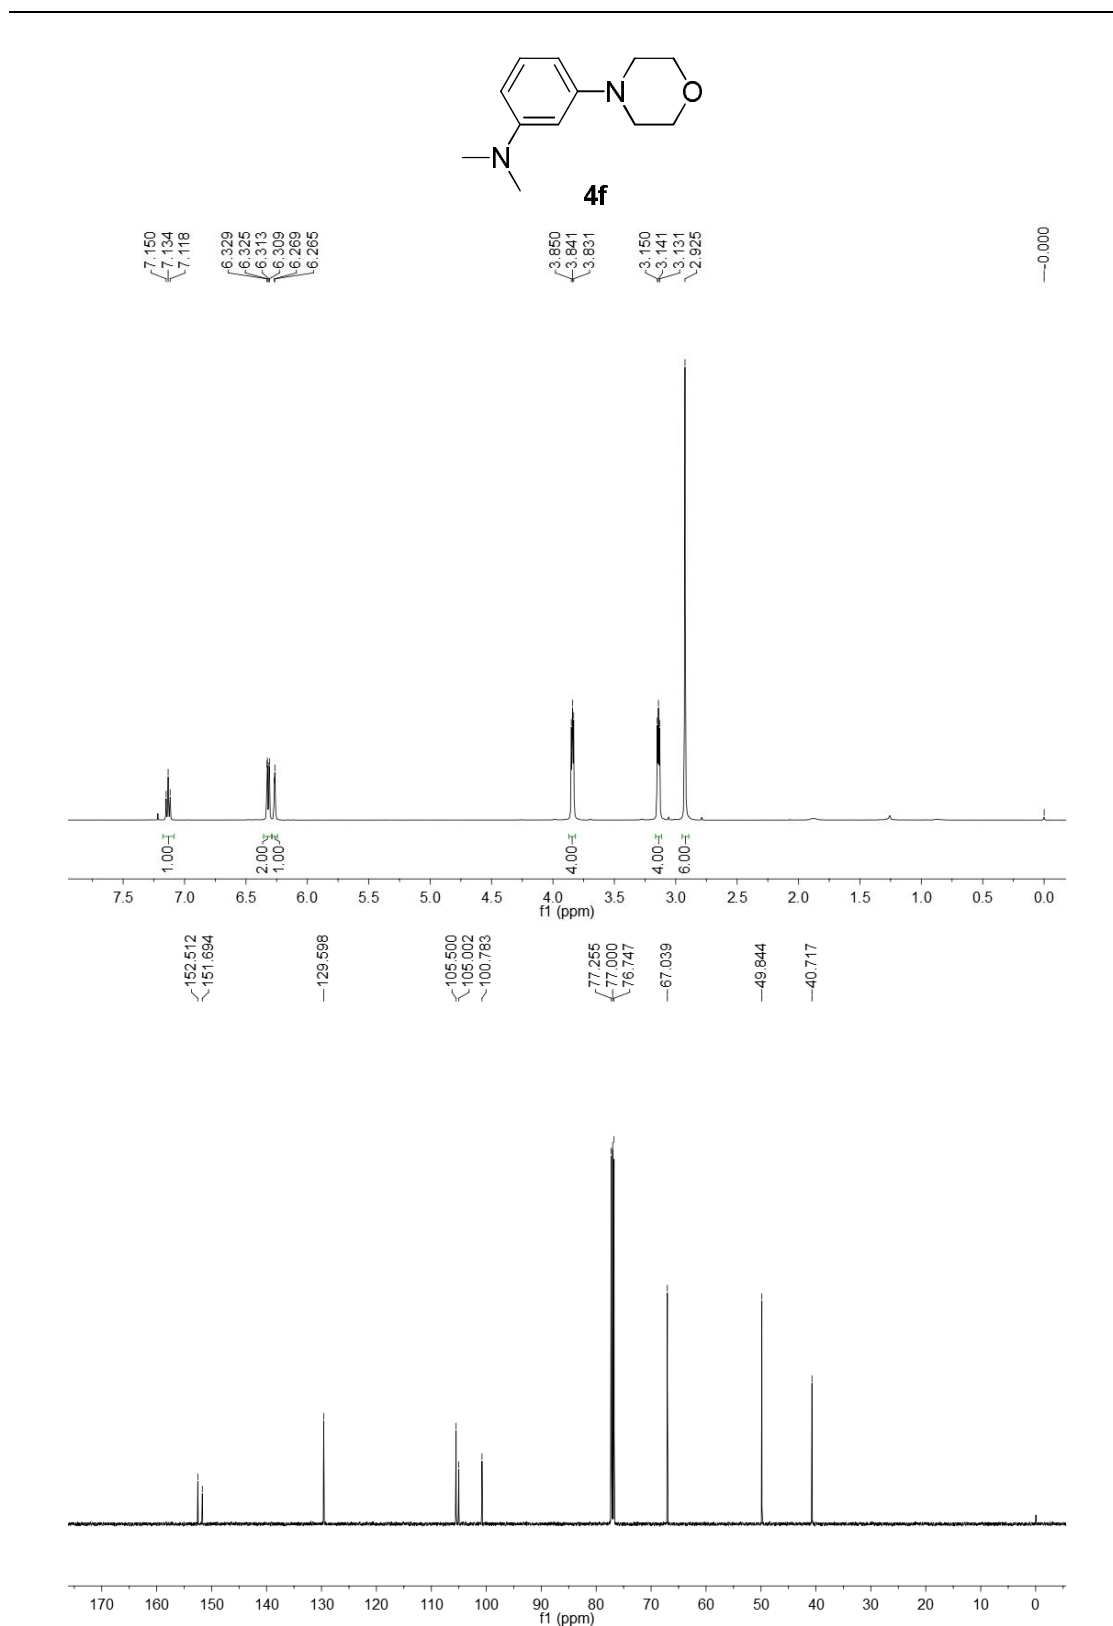

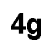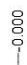



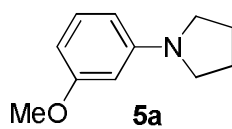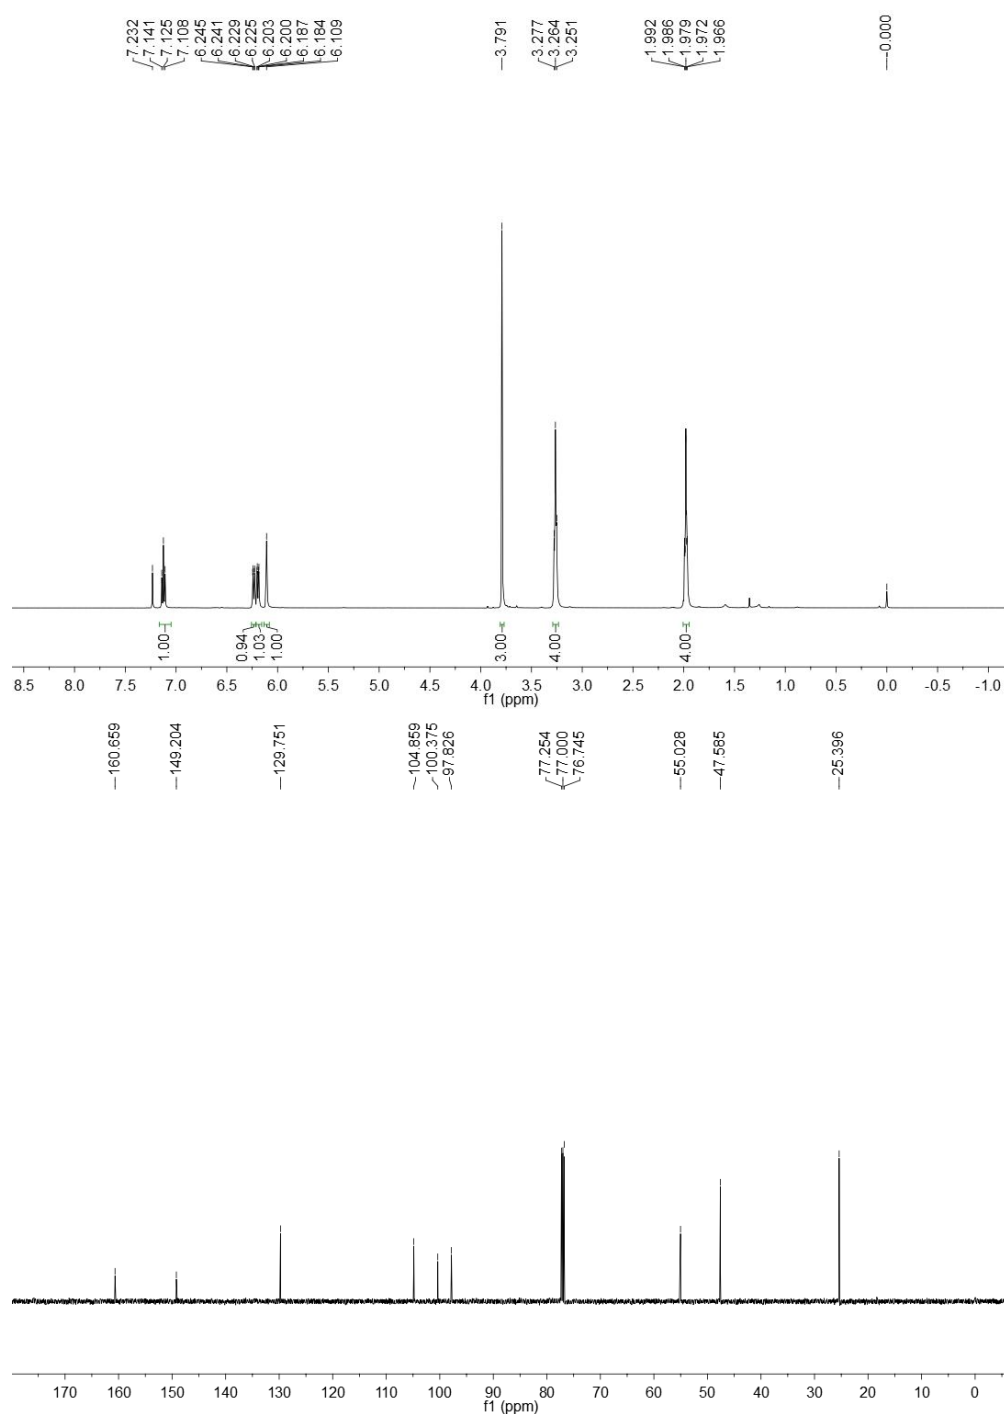

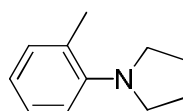

**5b**

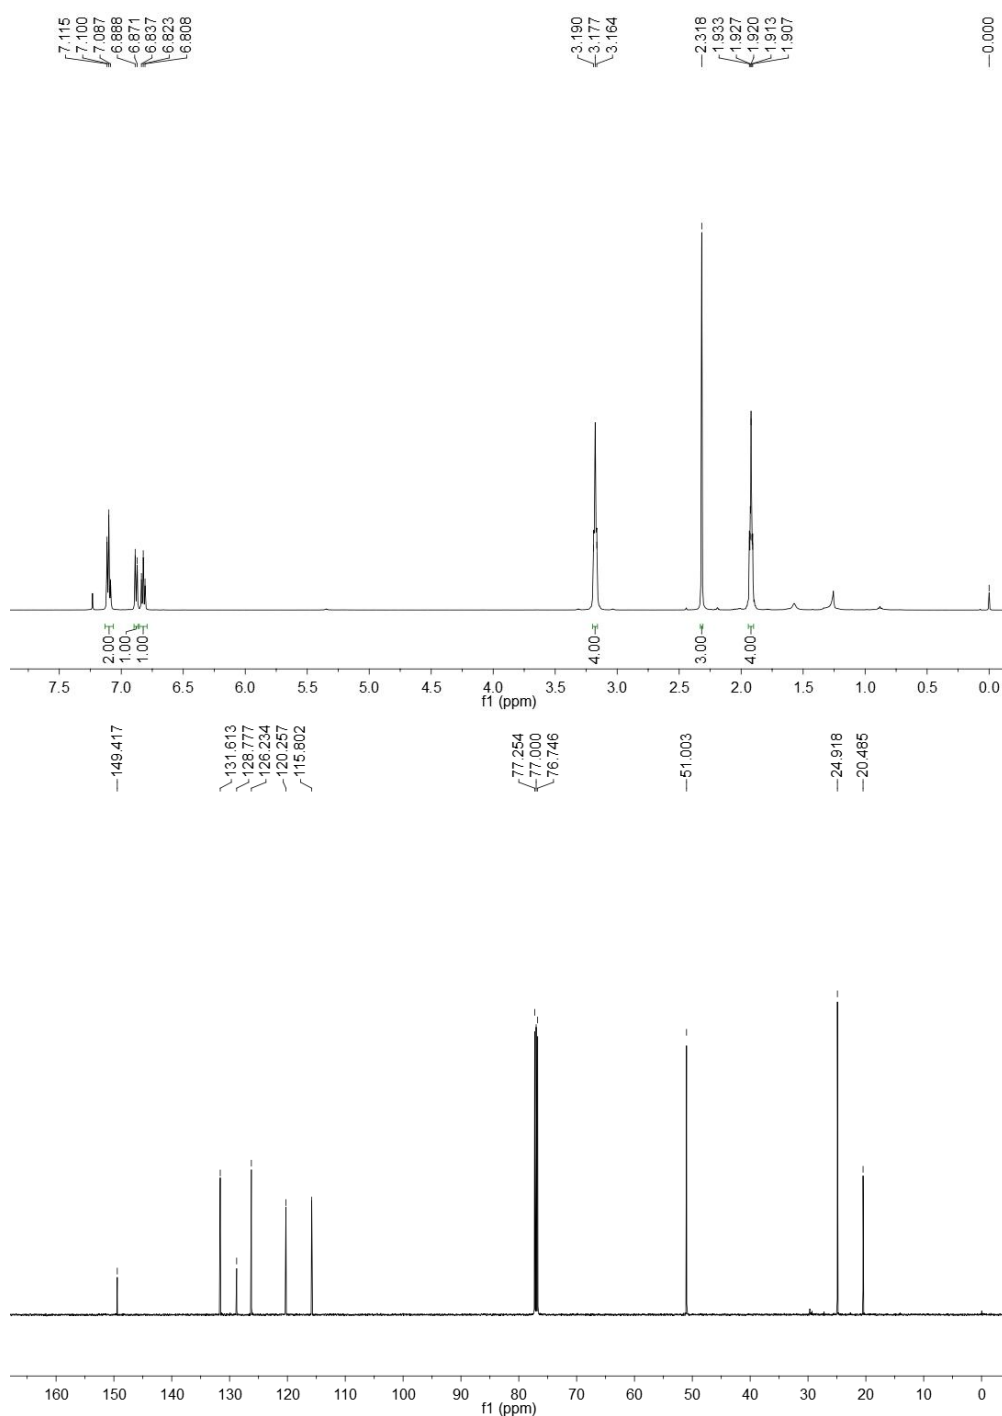

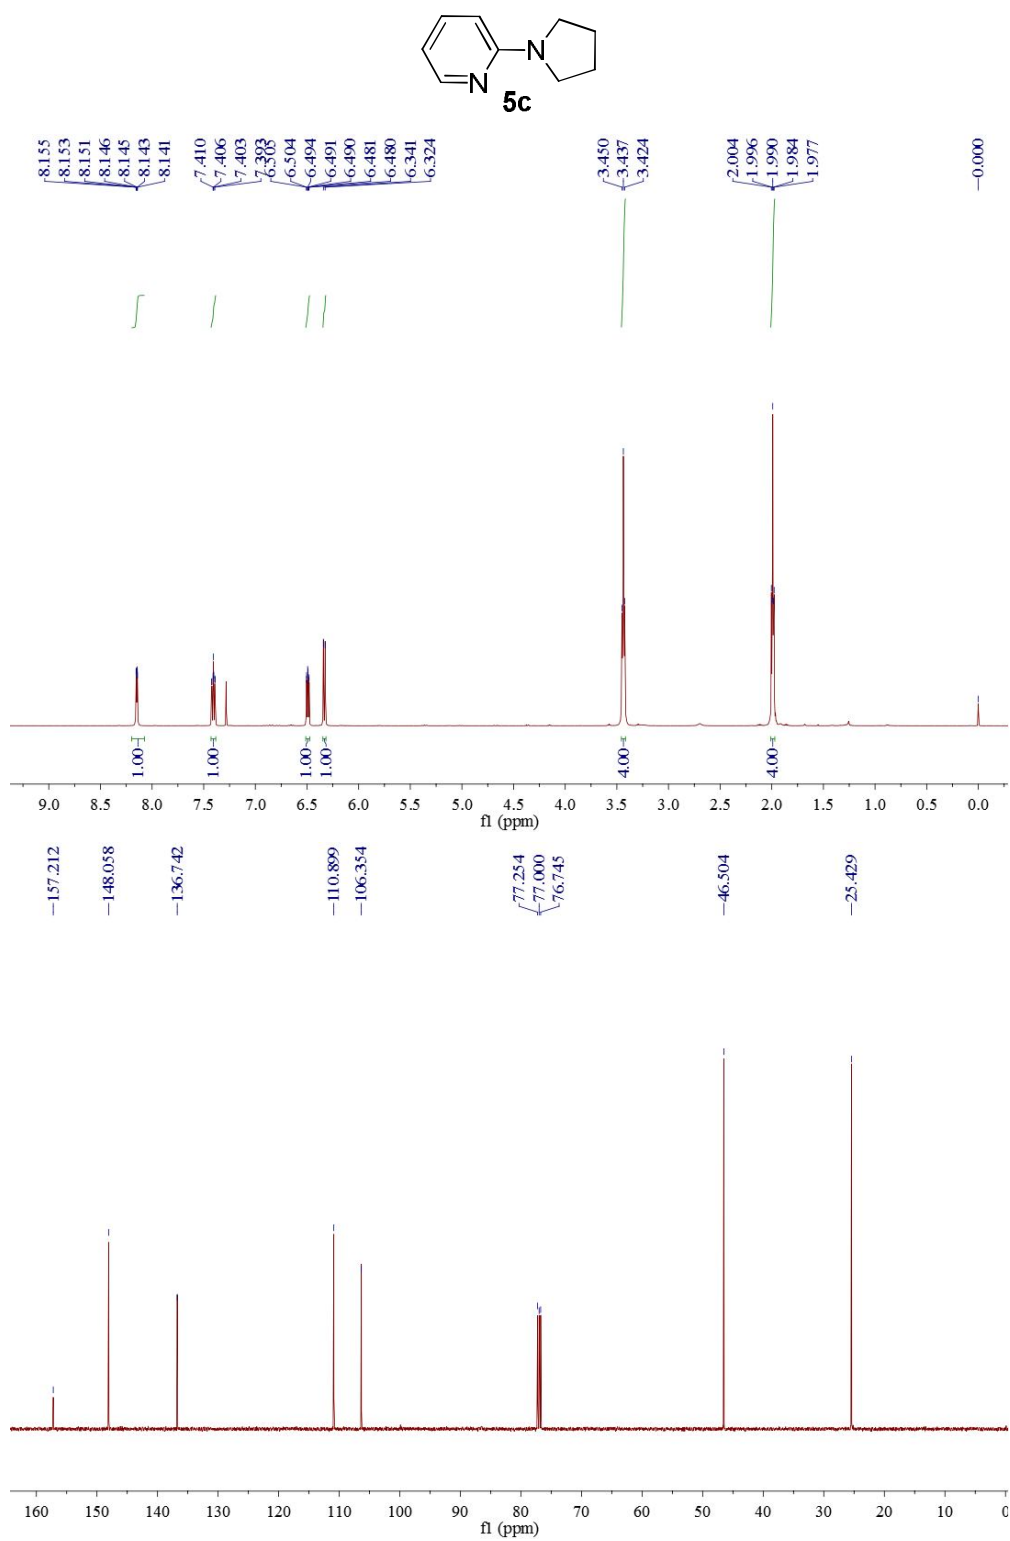

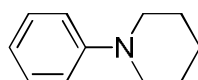

**6a**

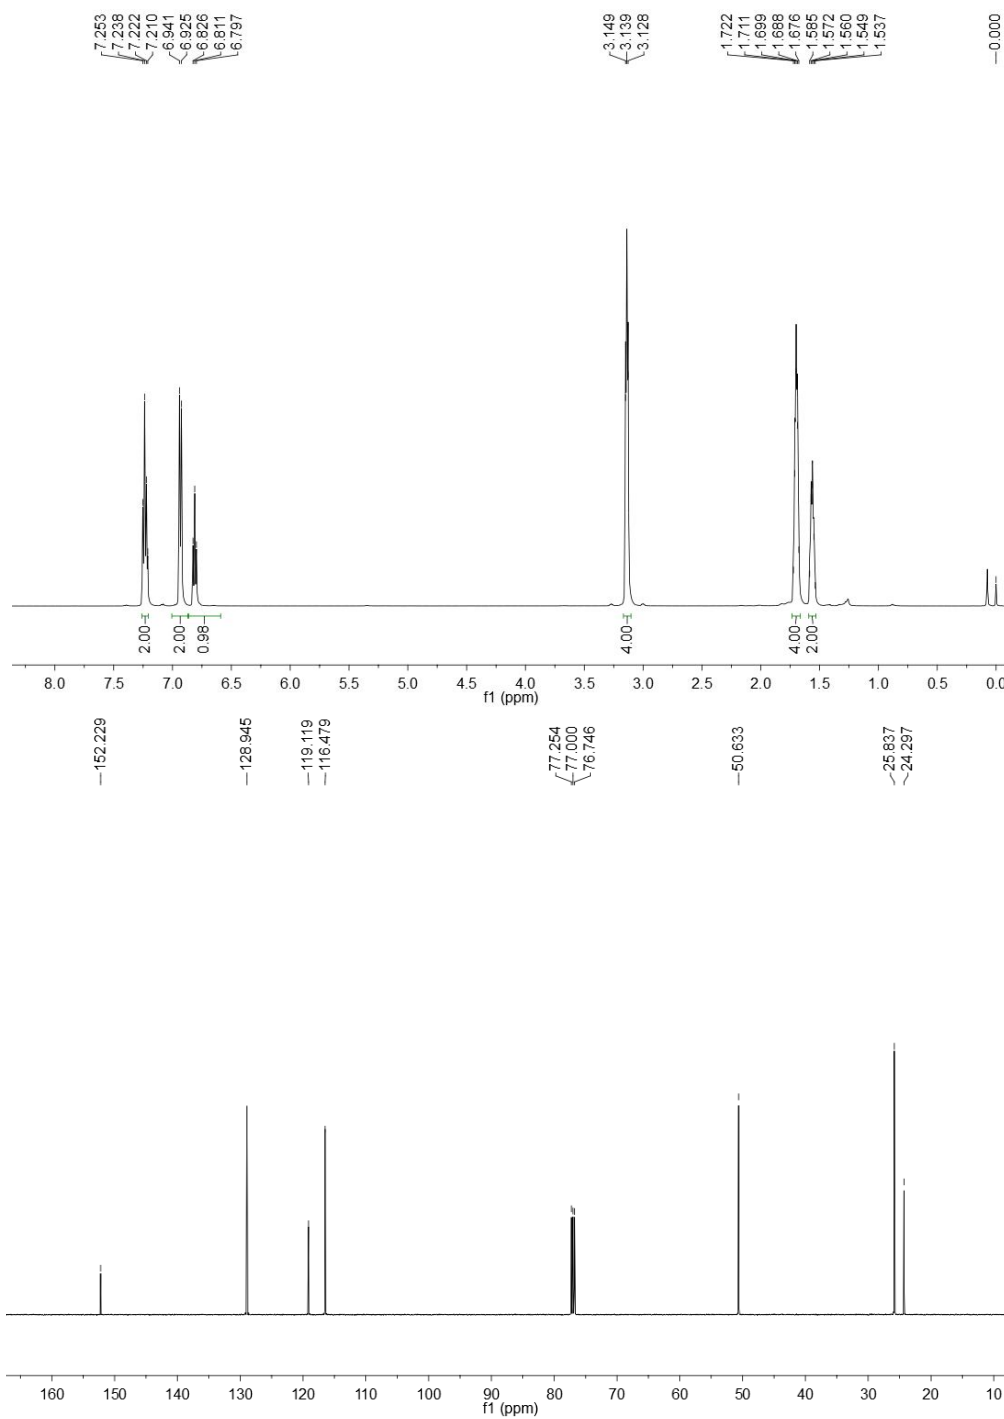

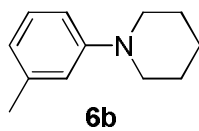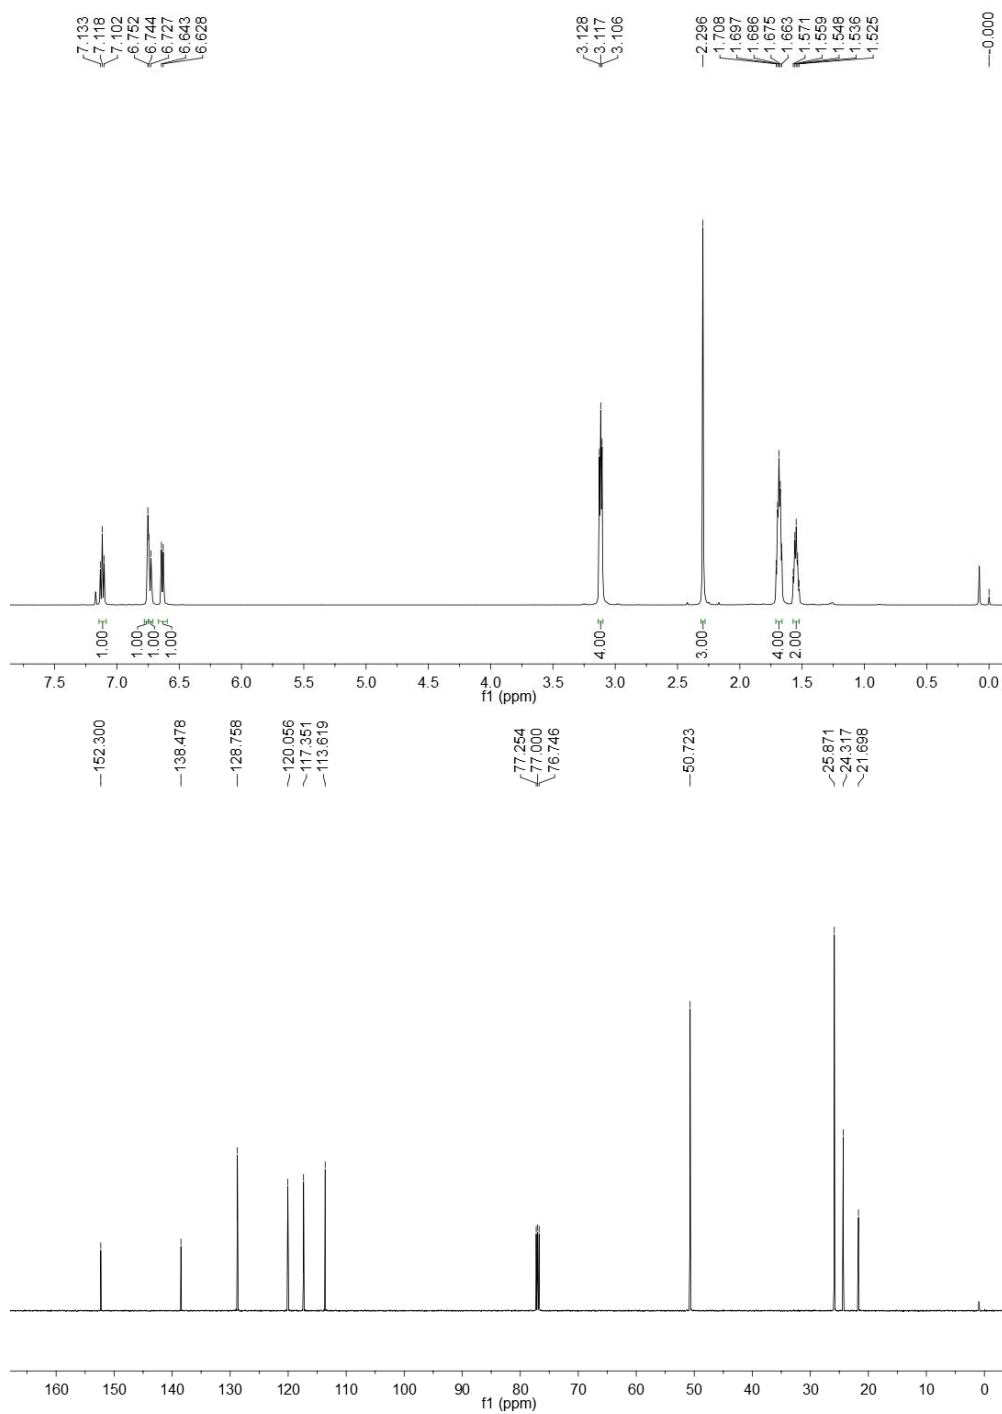

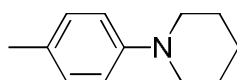

**6c**

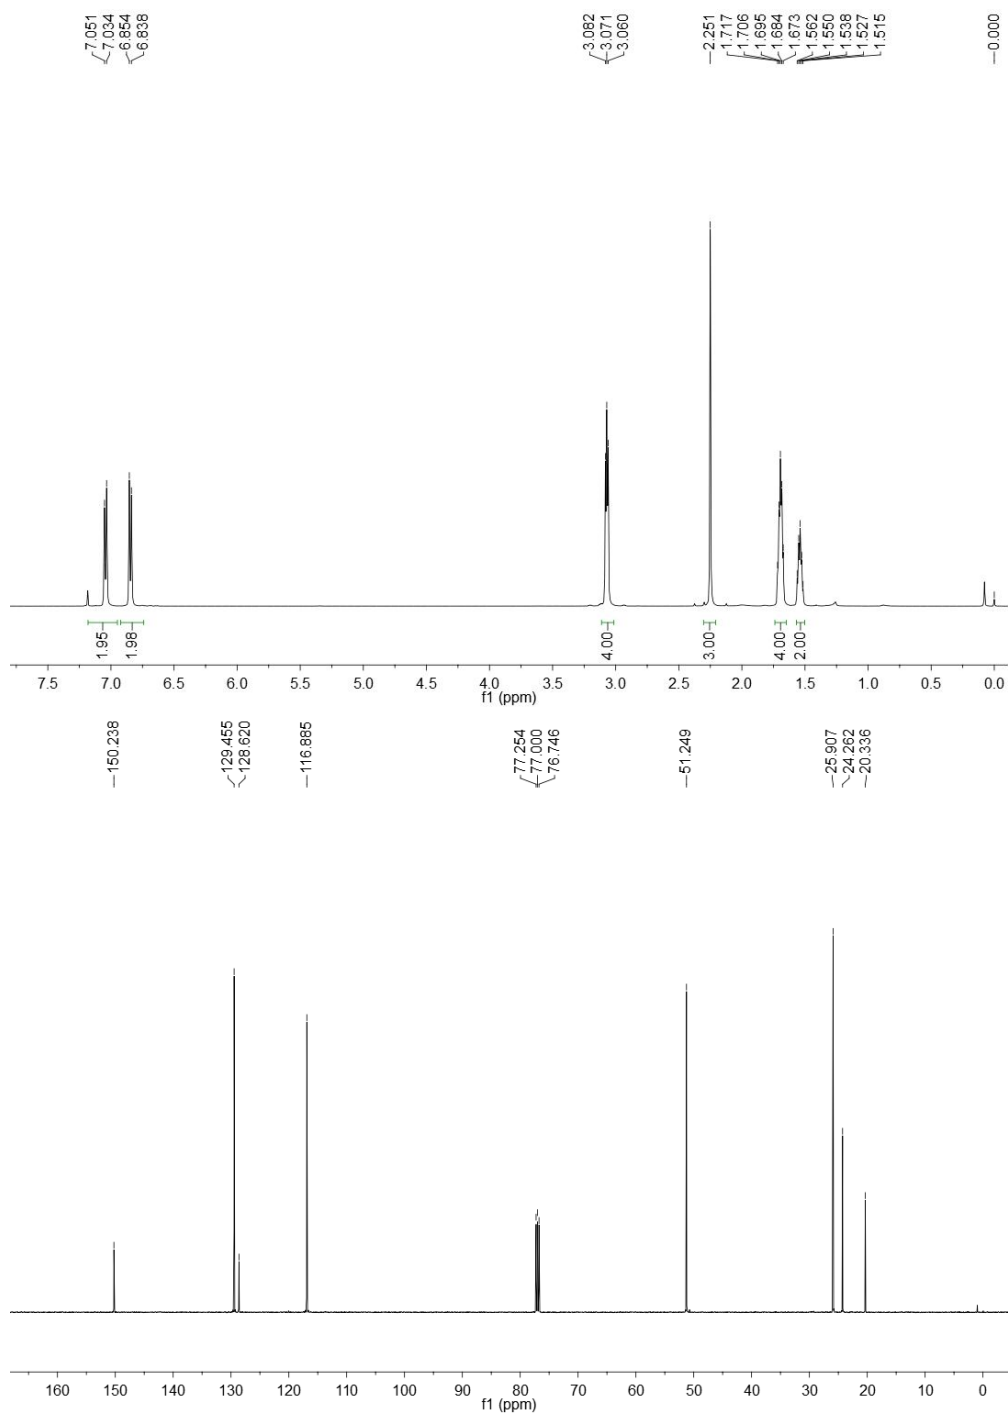

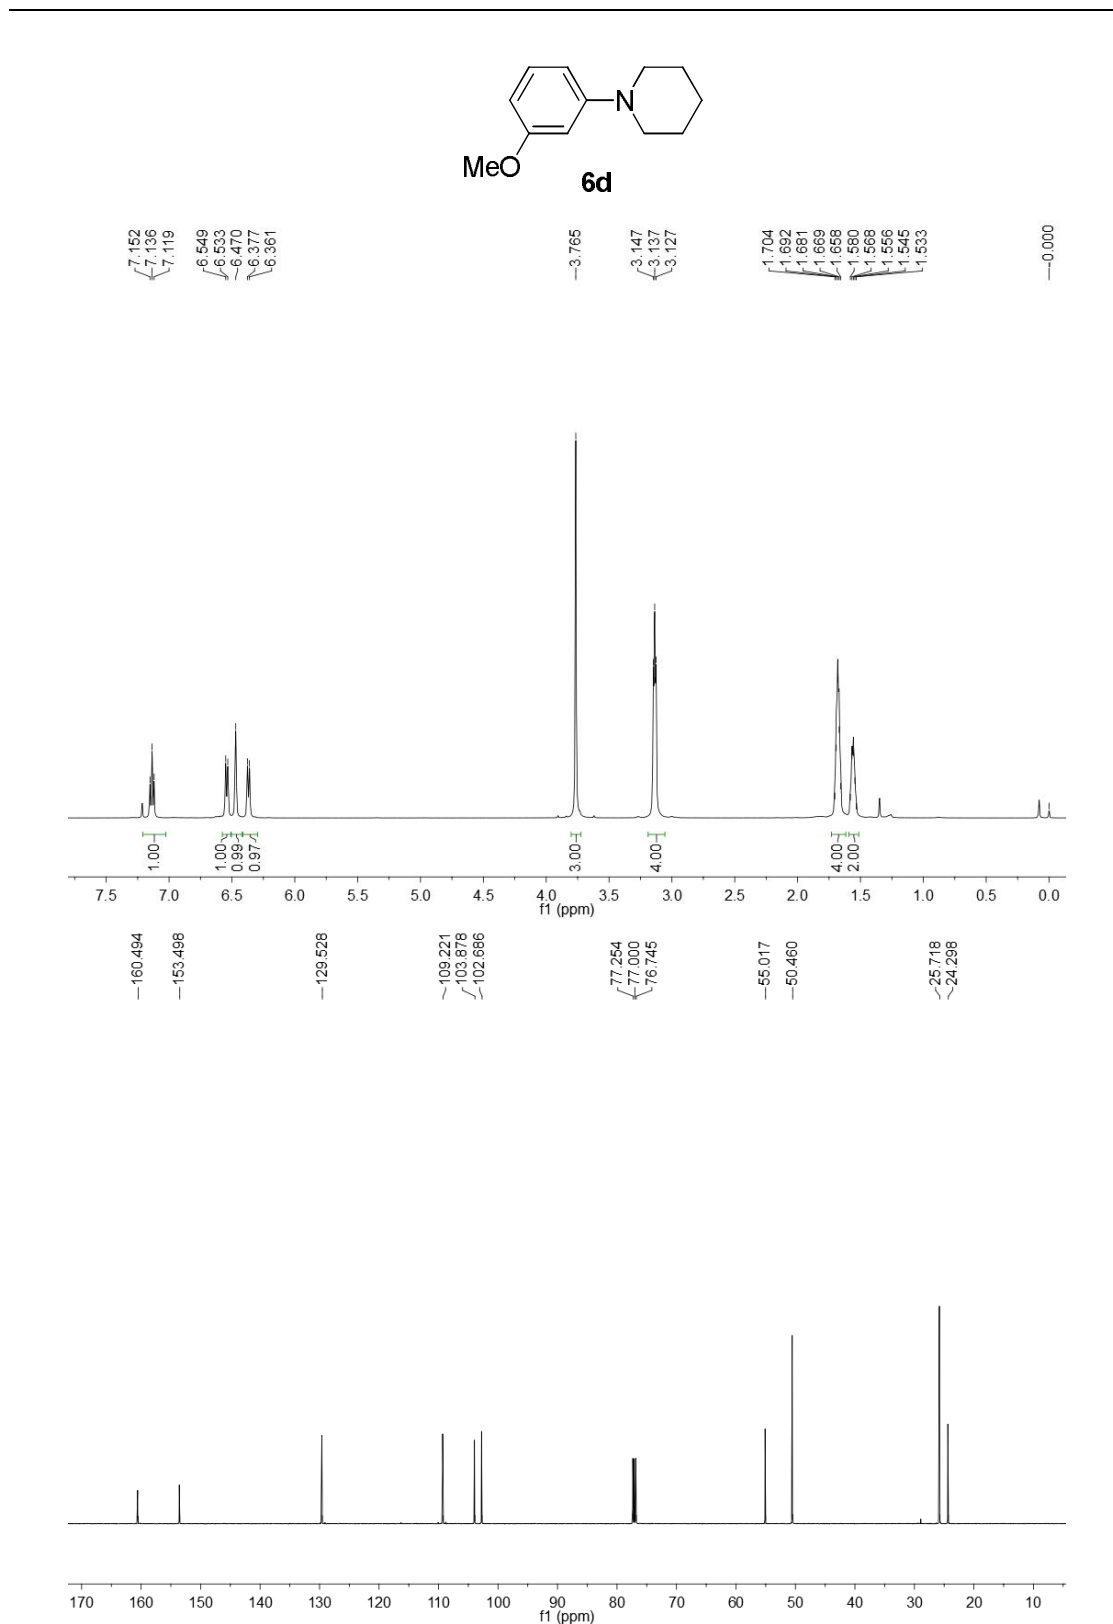

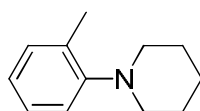

**6e**

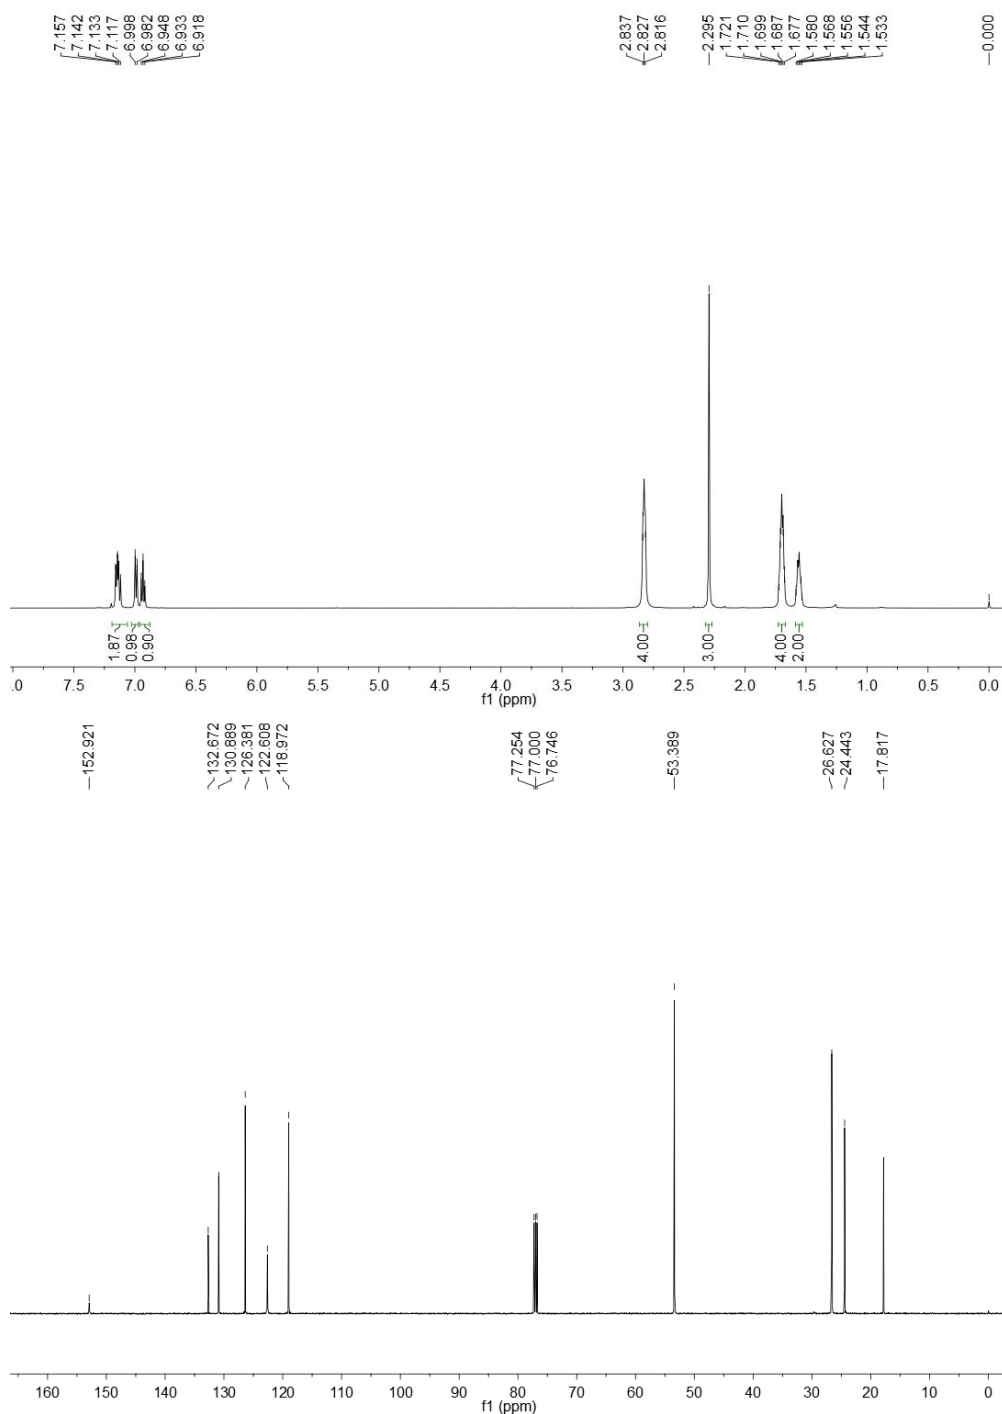



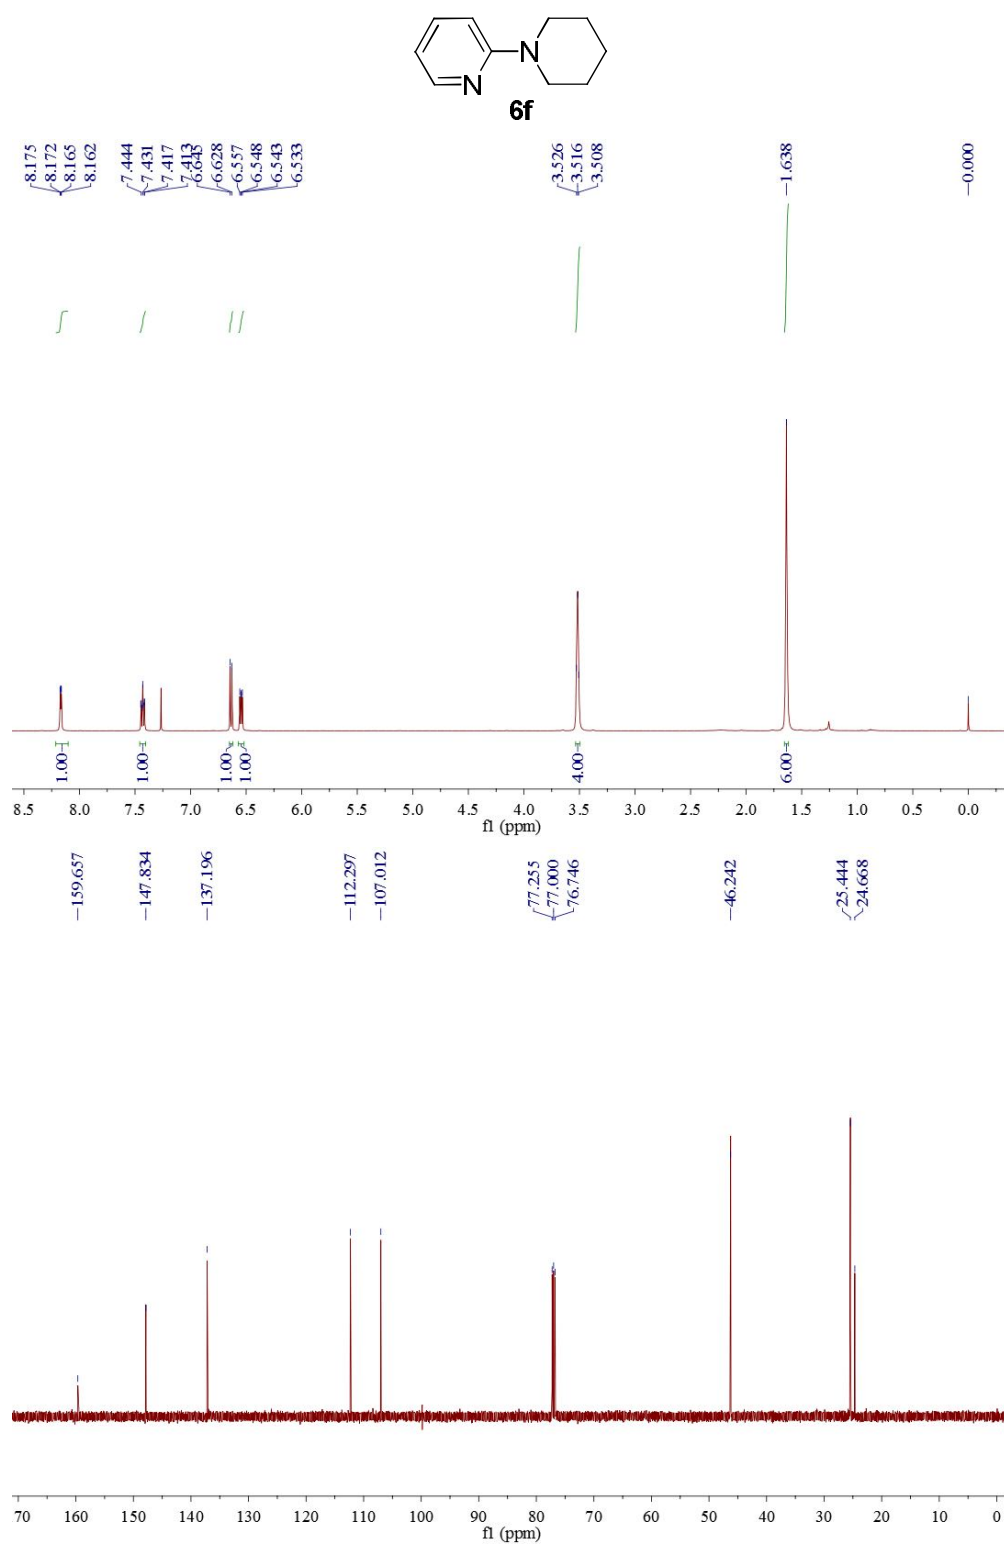

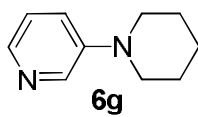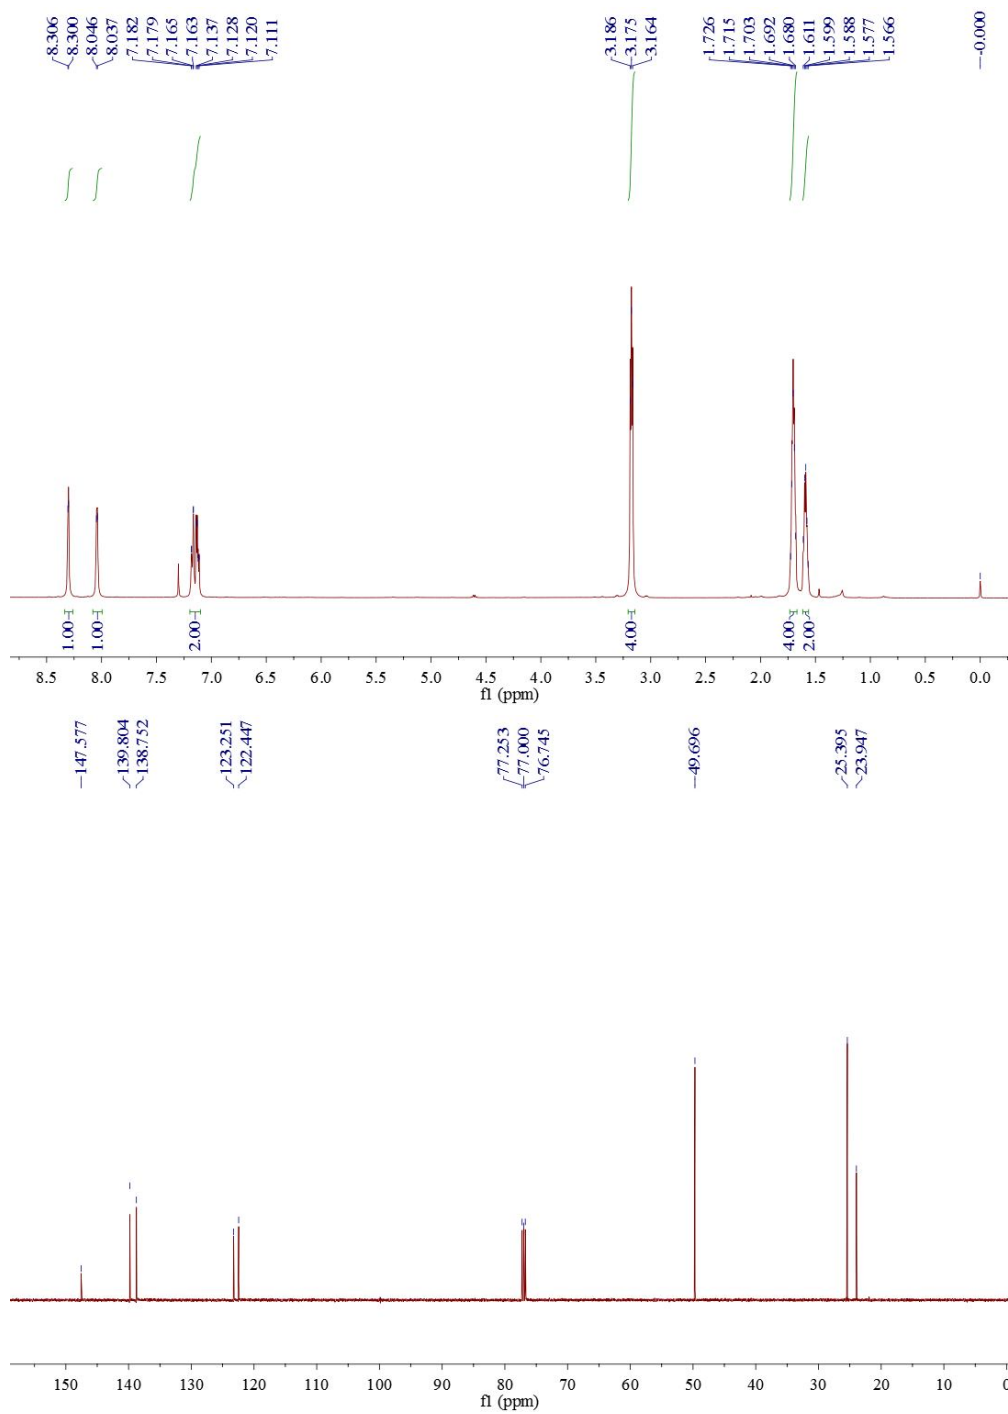

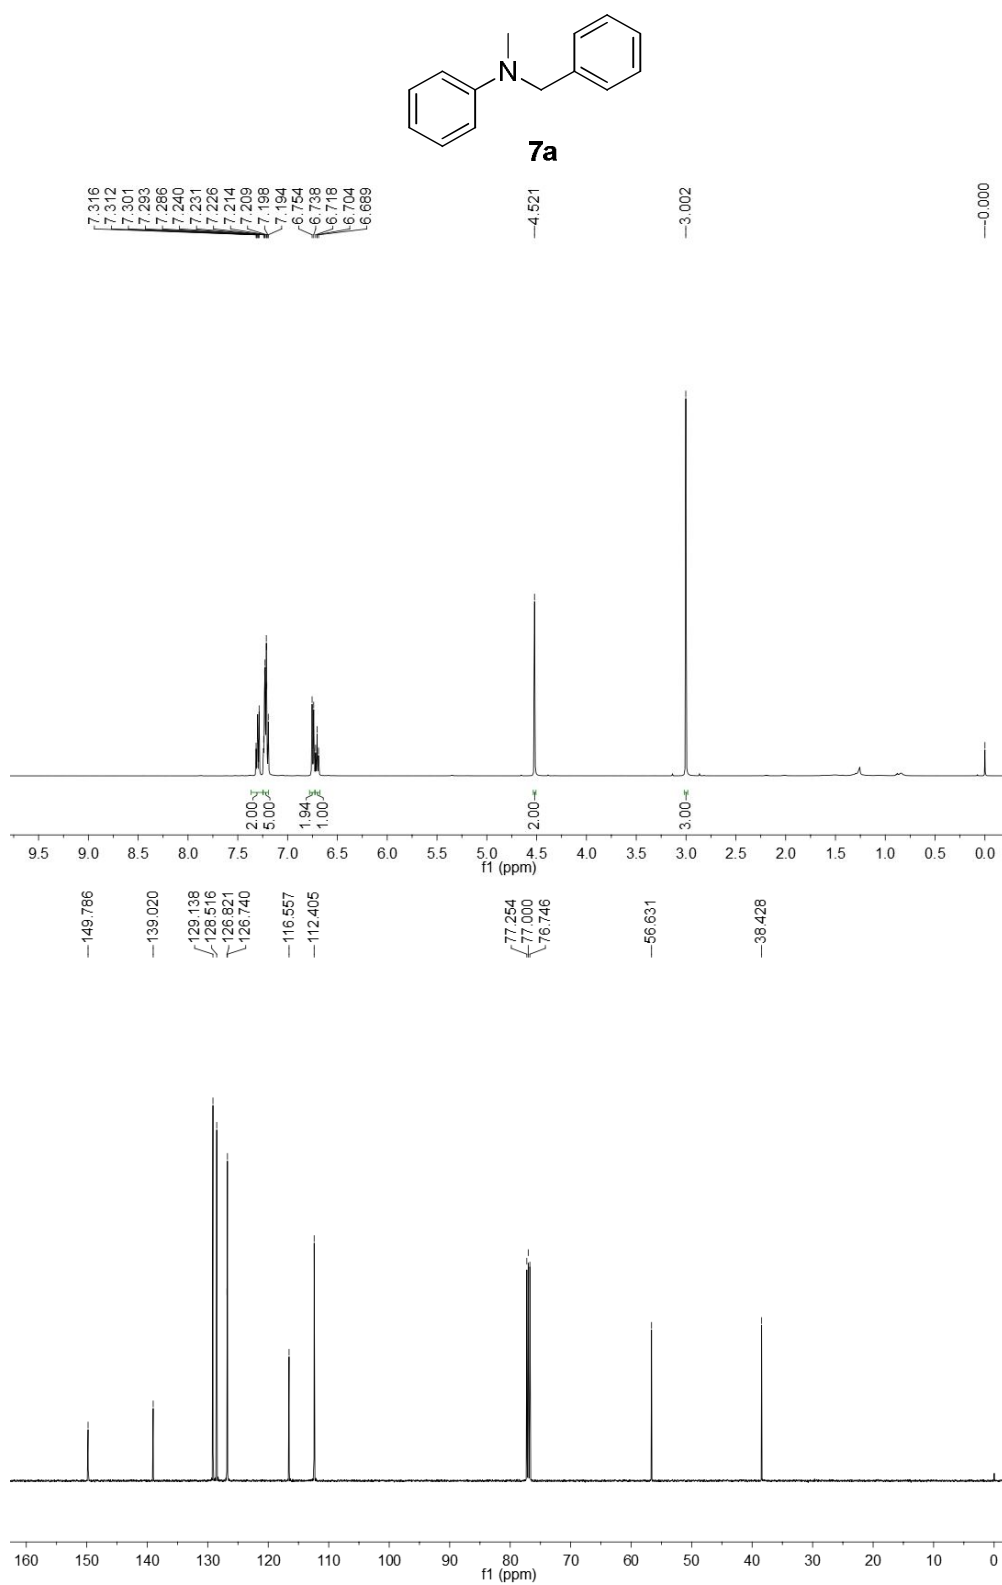

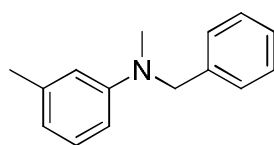

**7b**

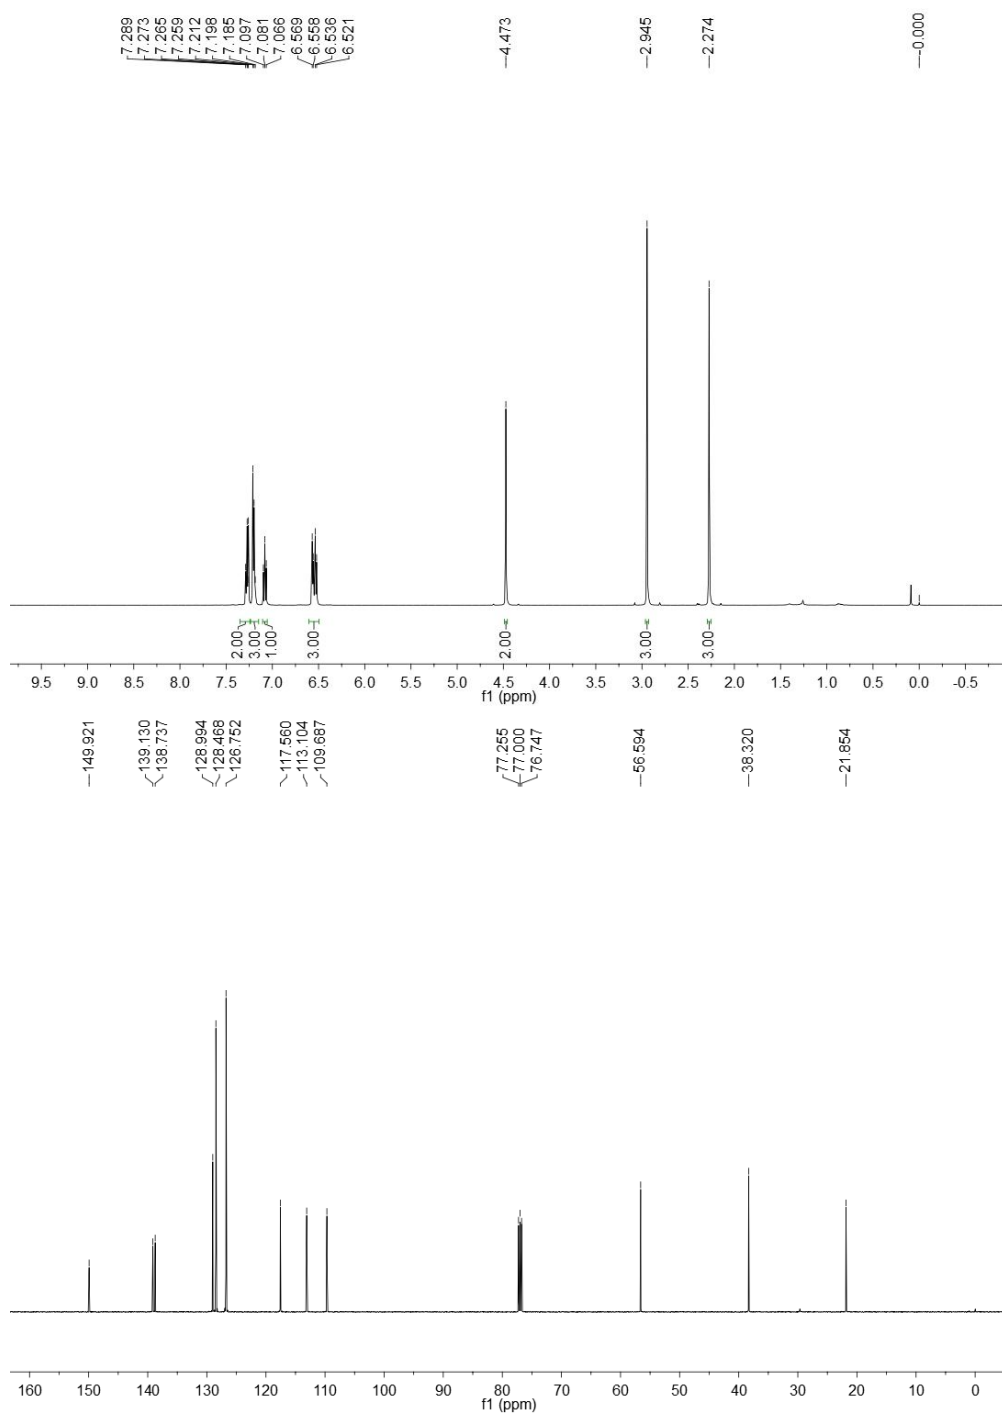

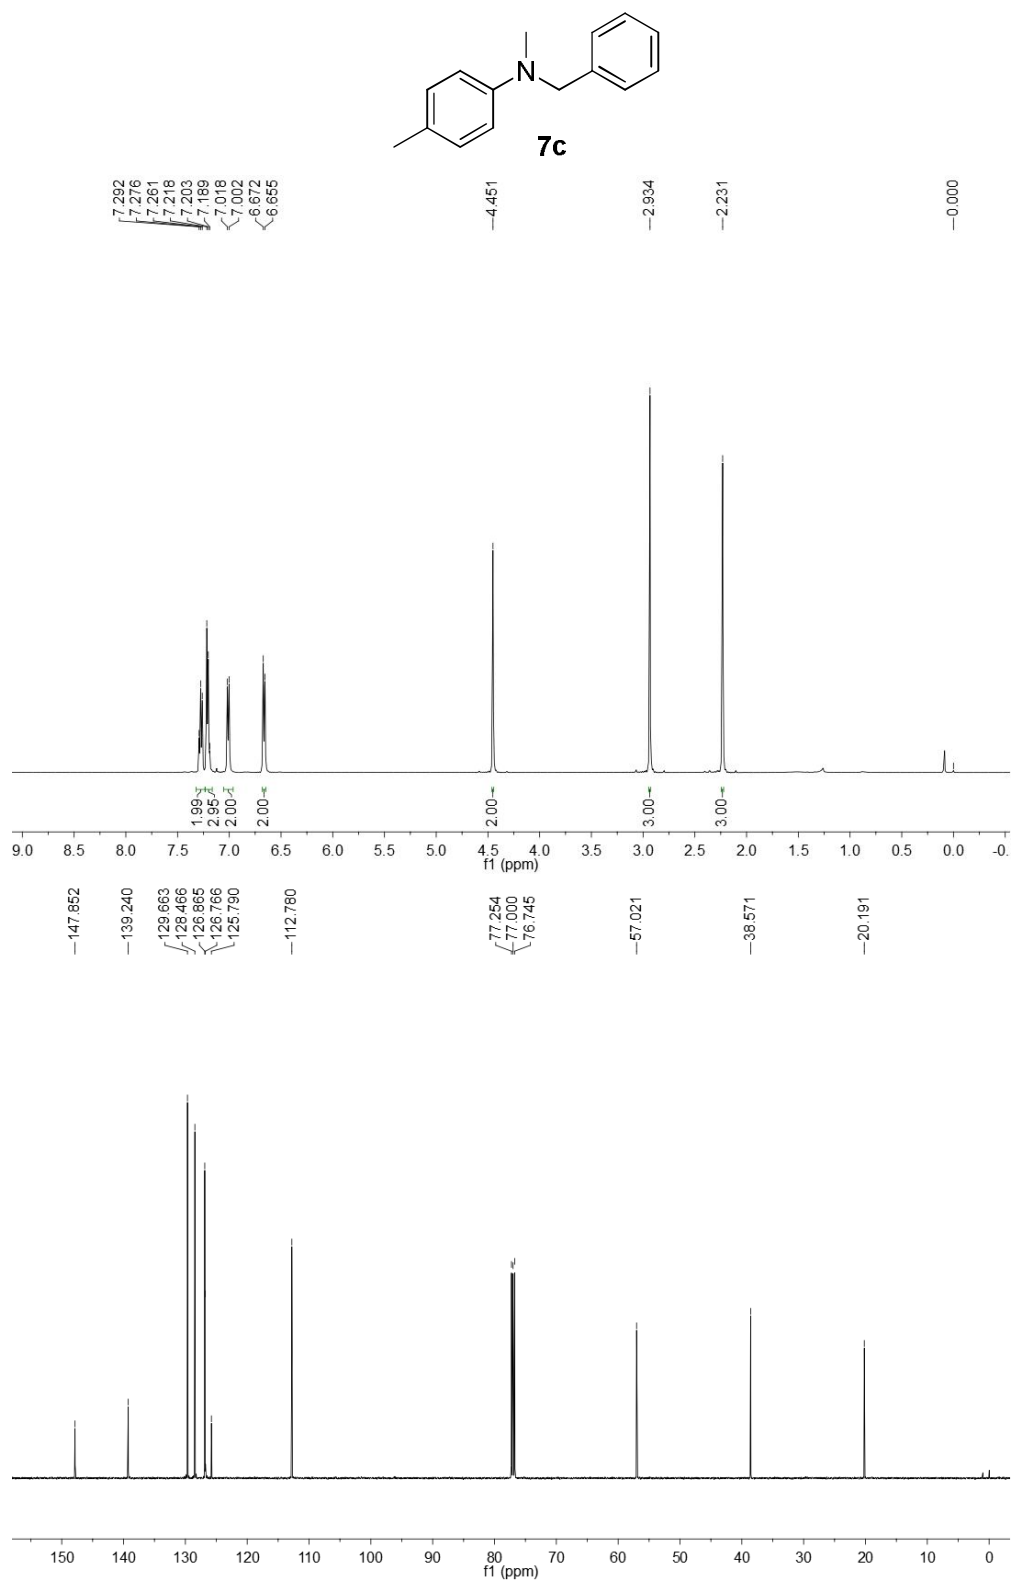

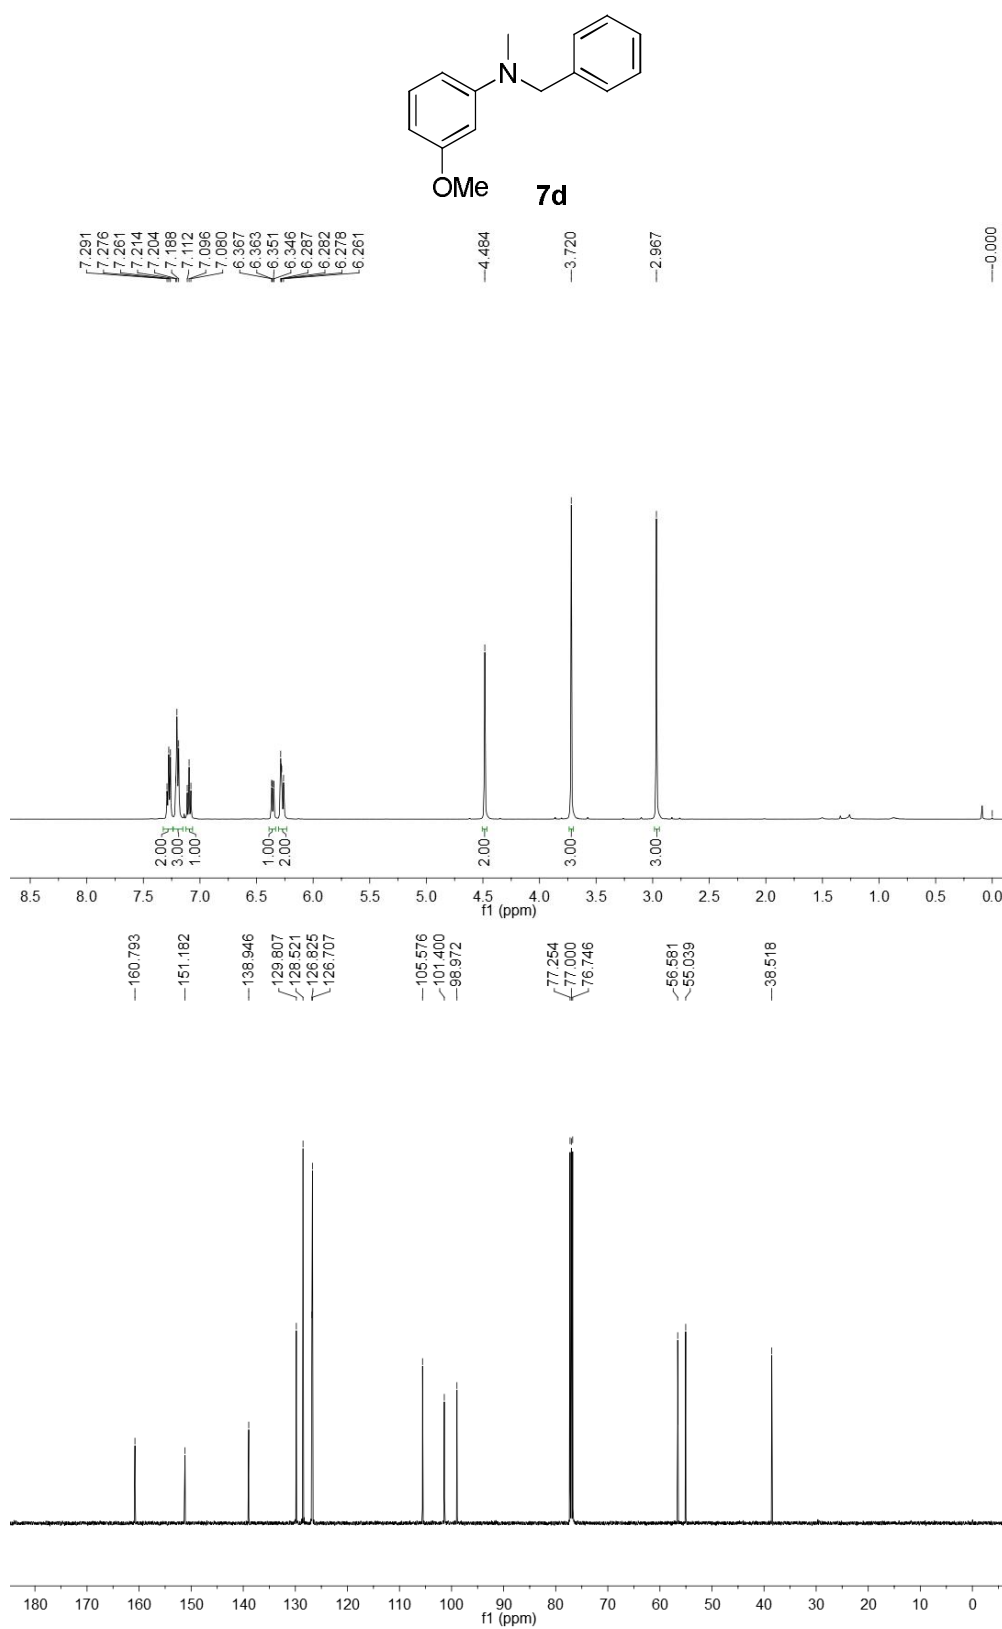

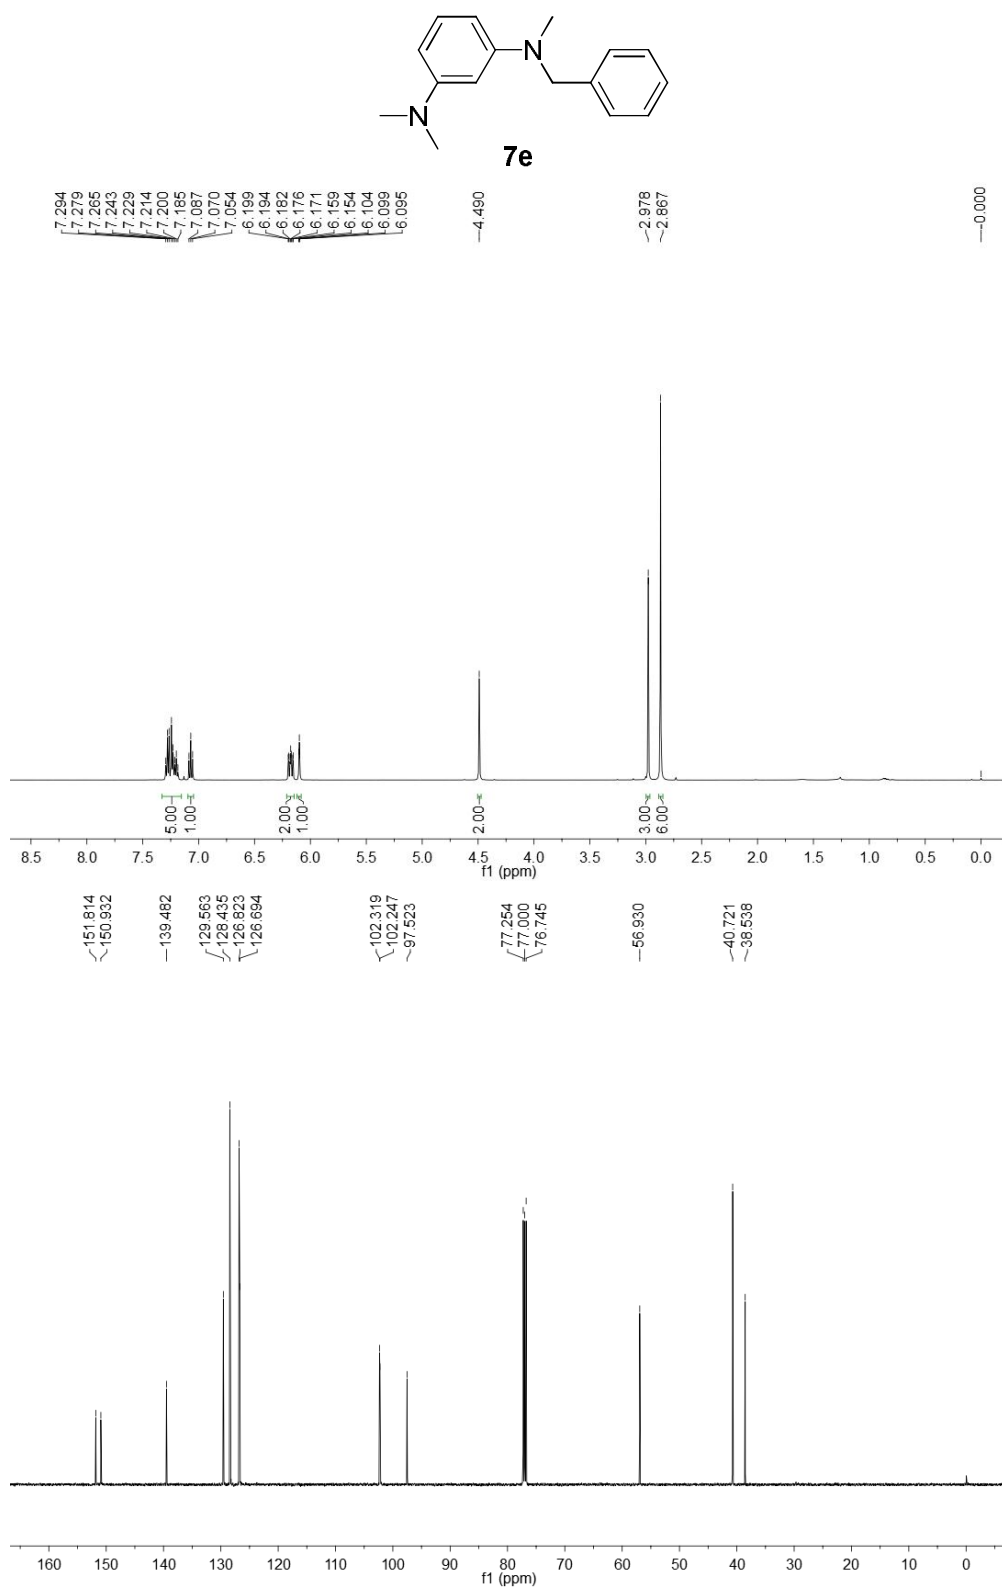

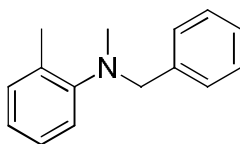

**7f**

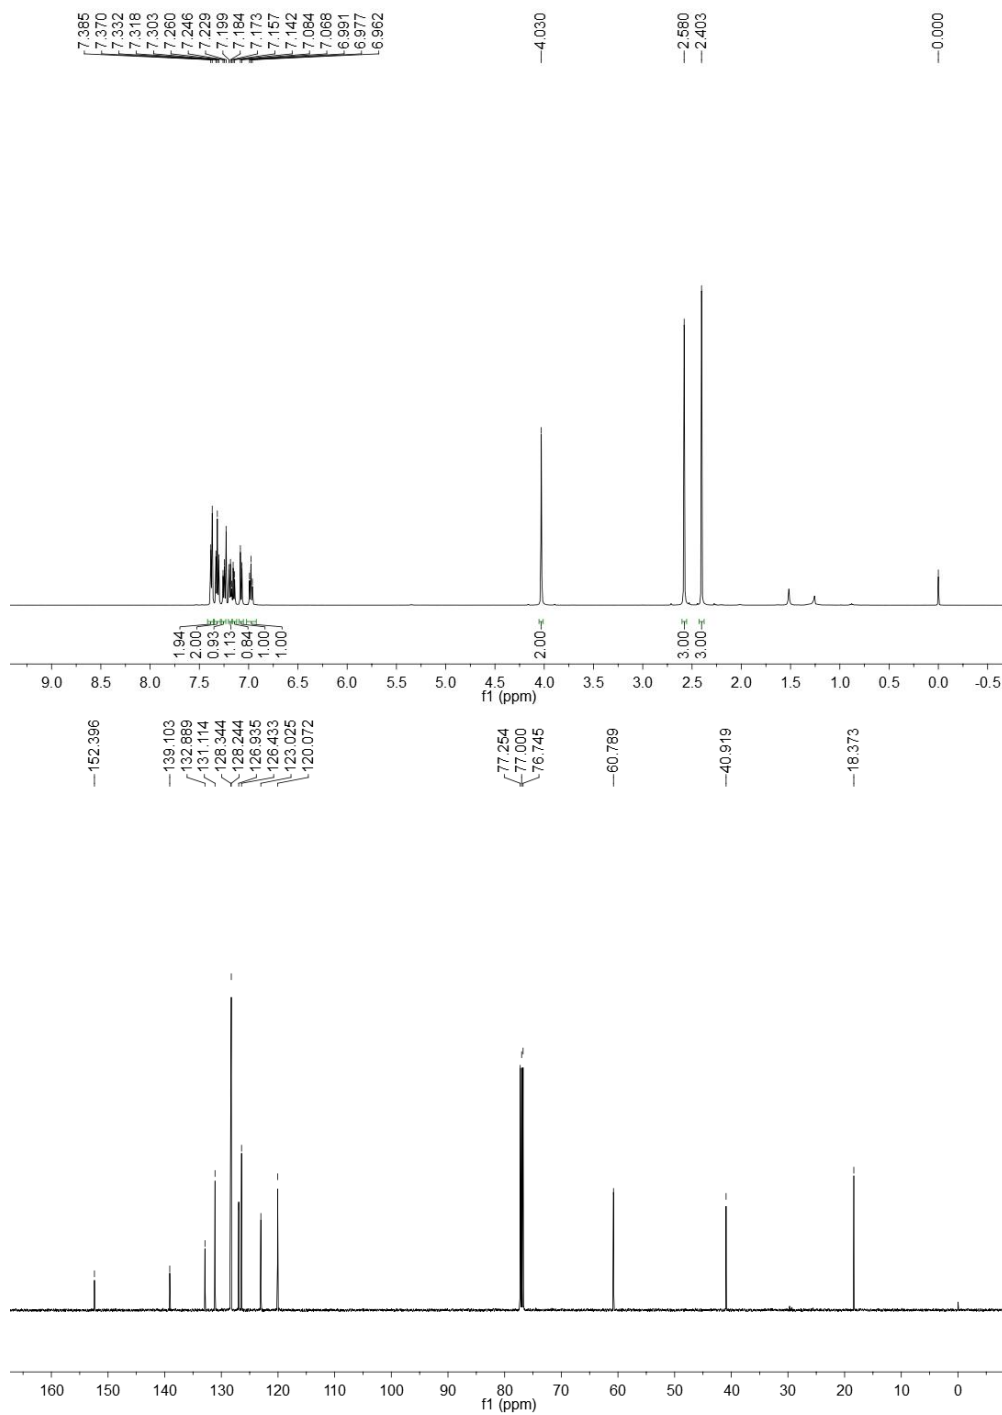



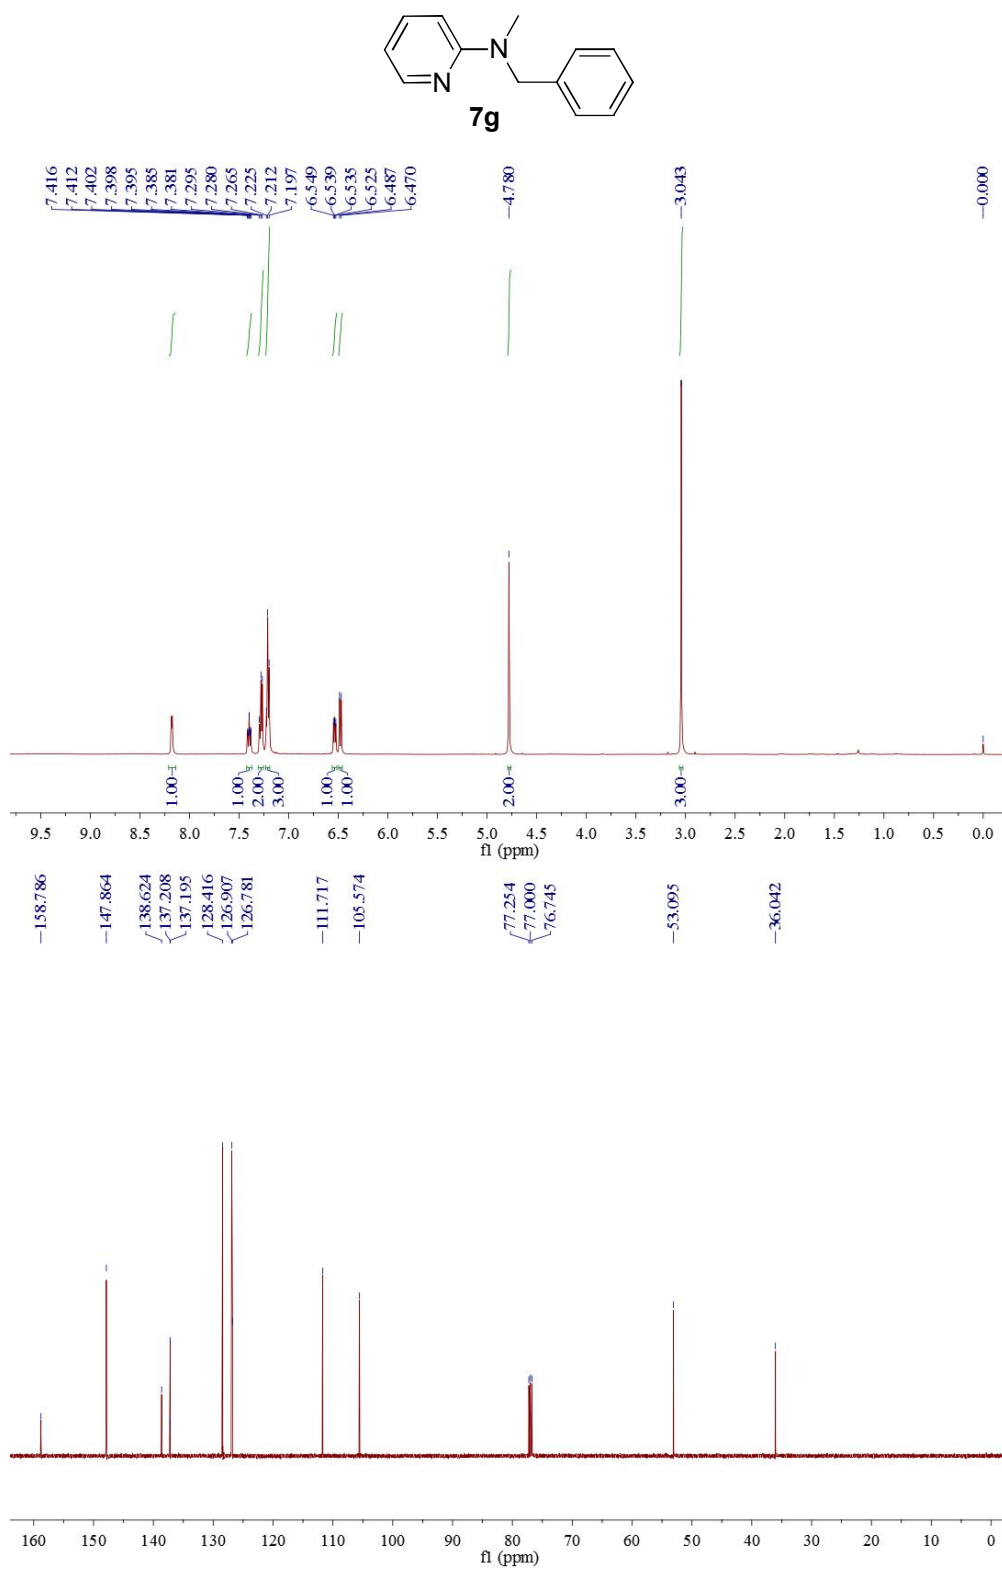

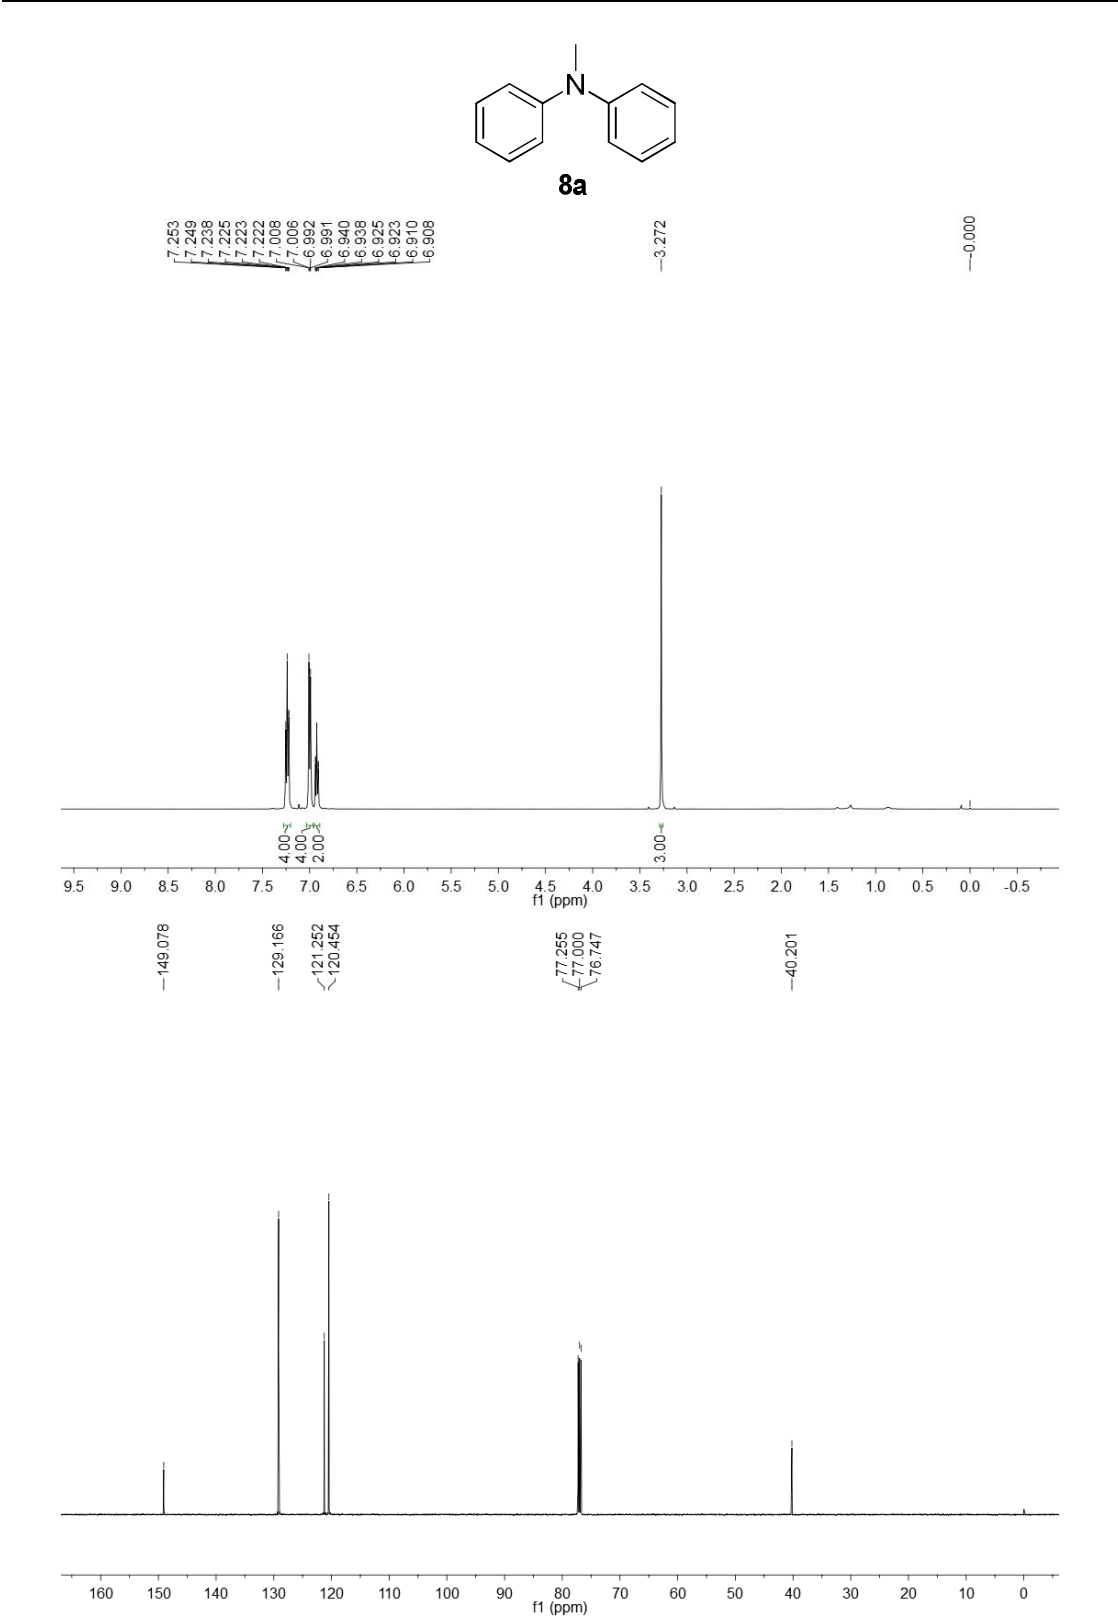

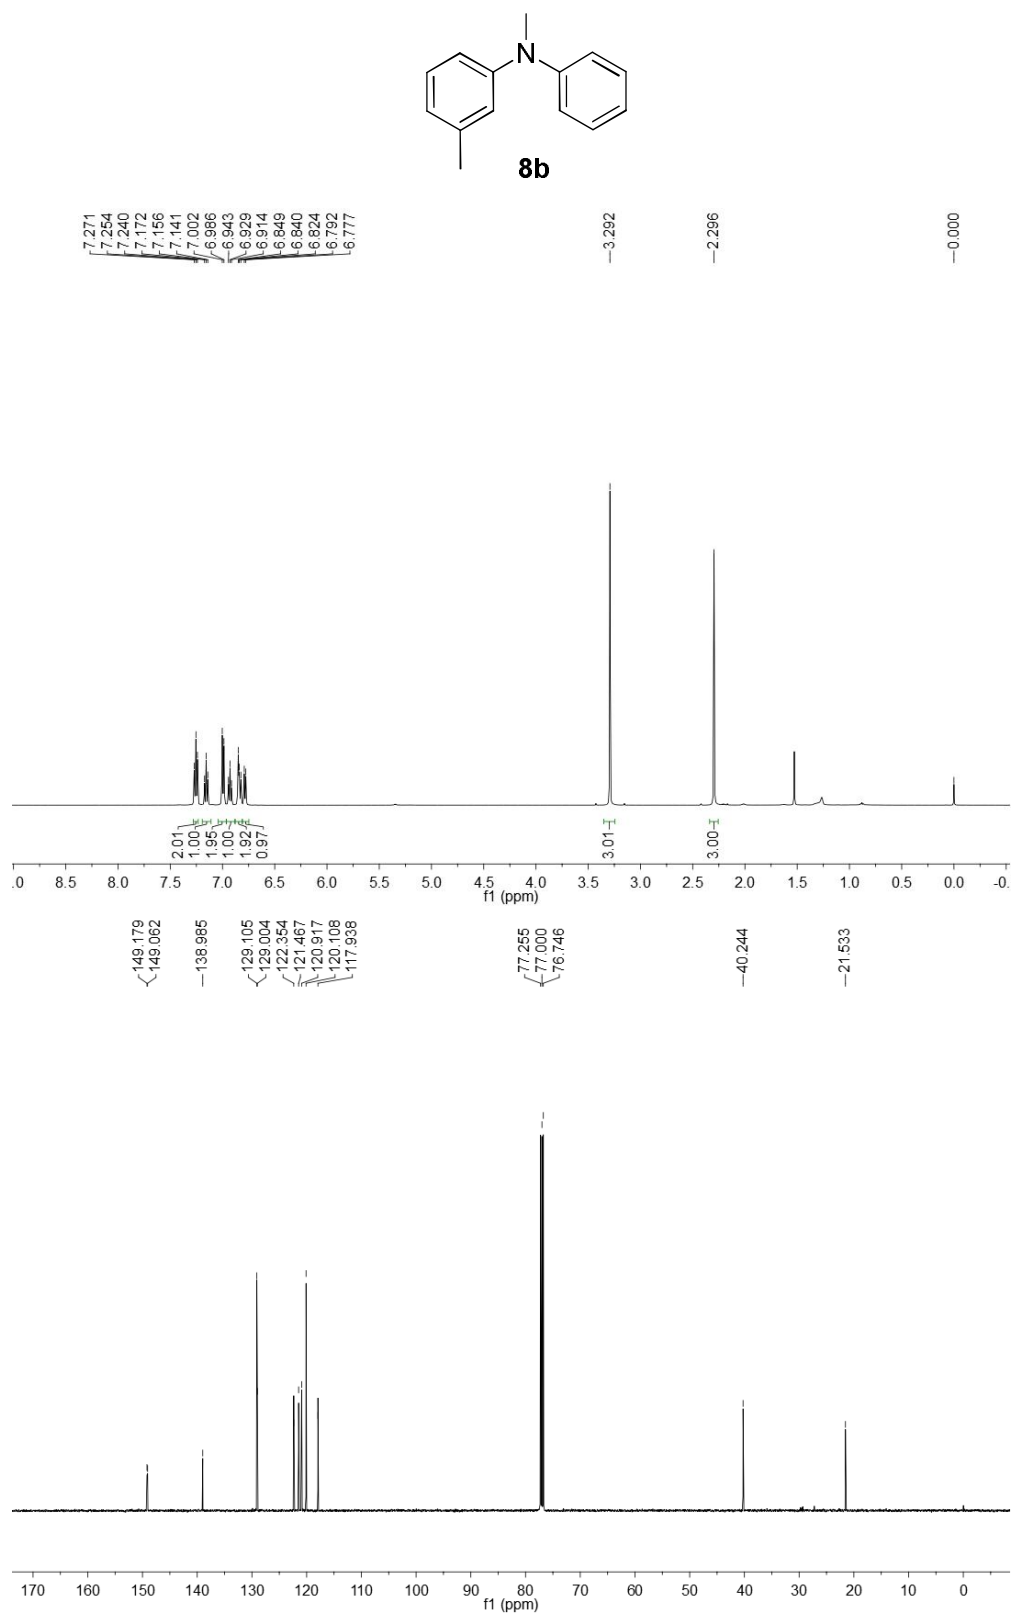

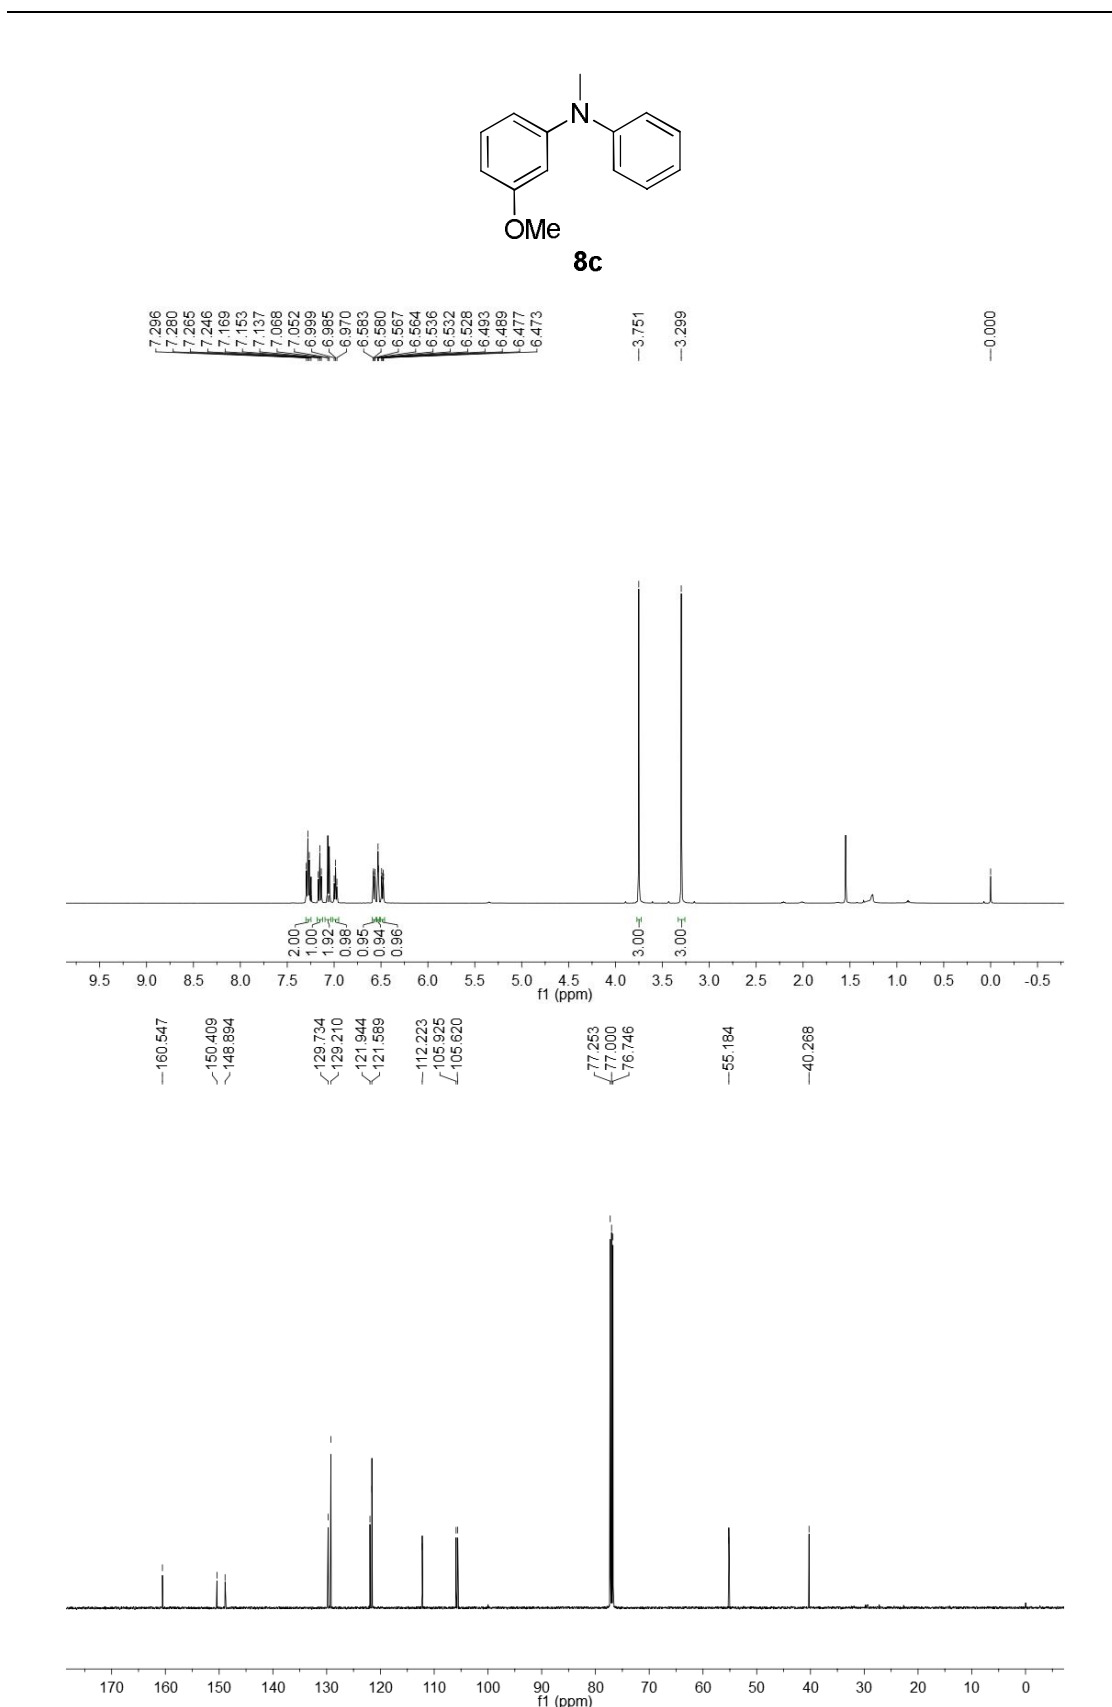

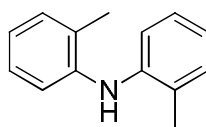

**9a**

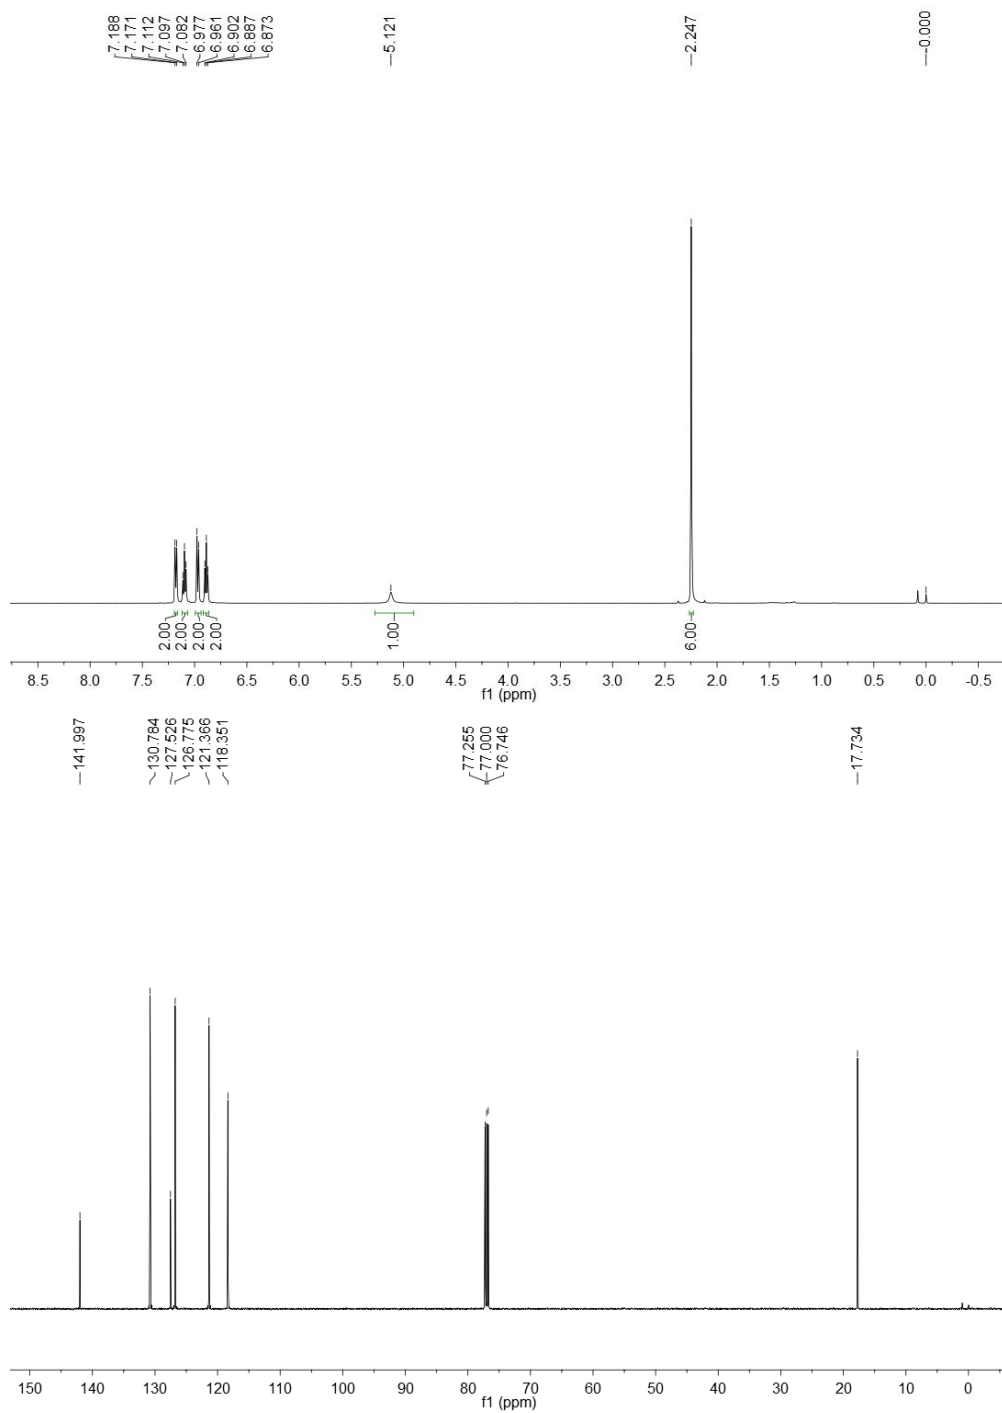

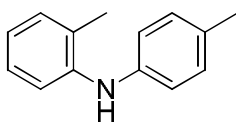

**9b**

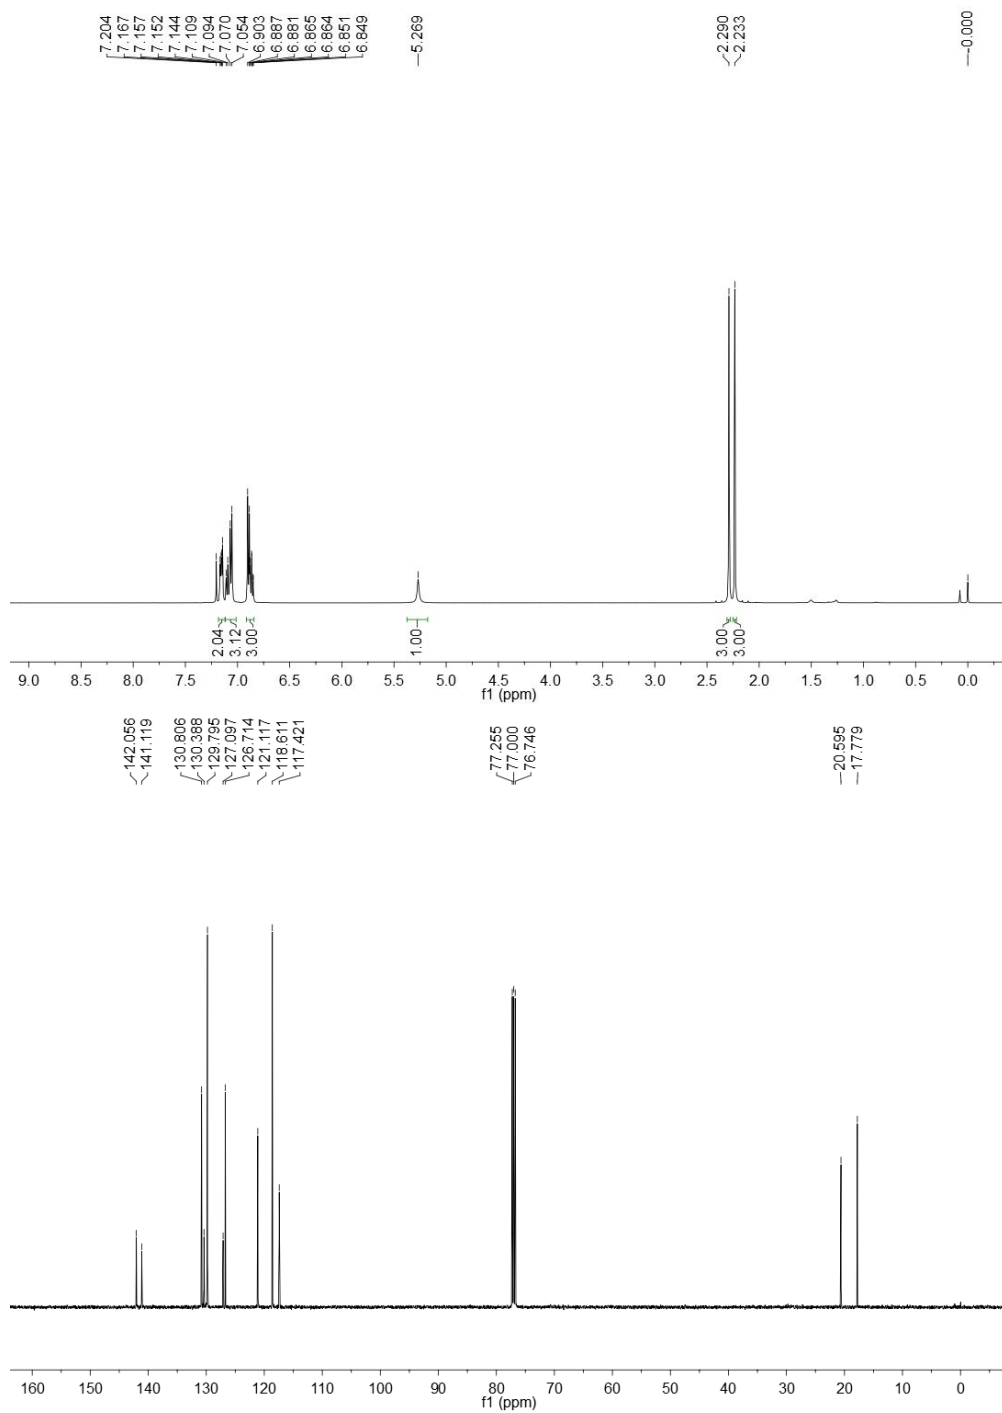

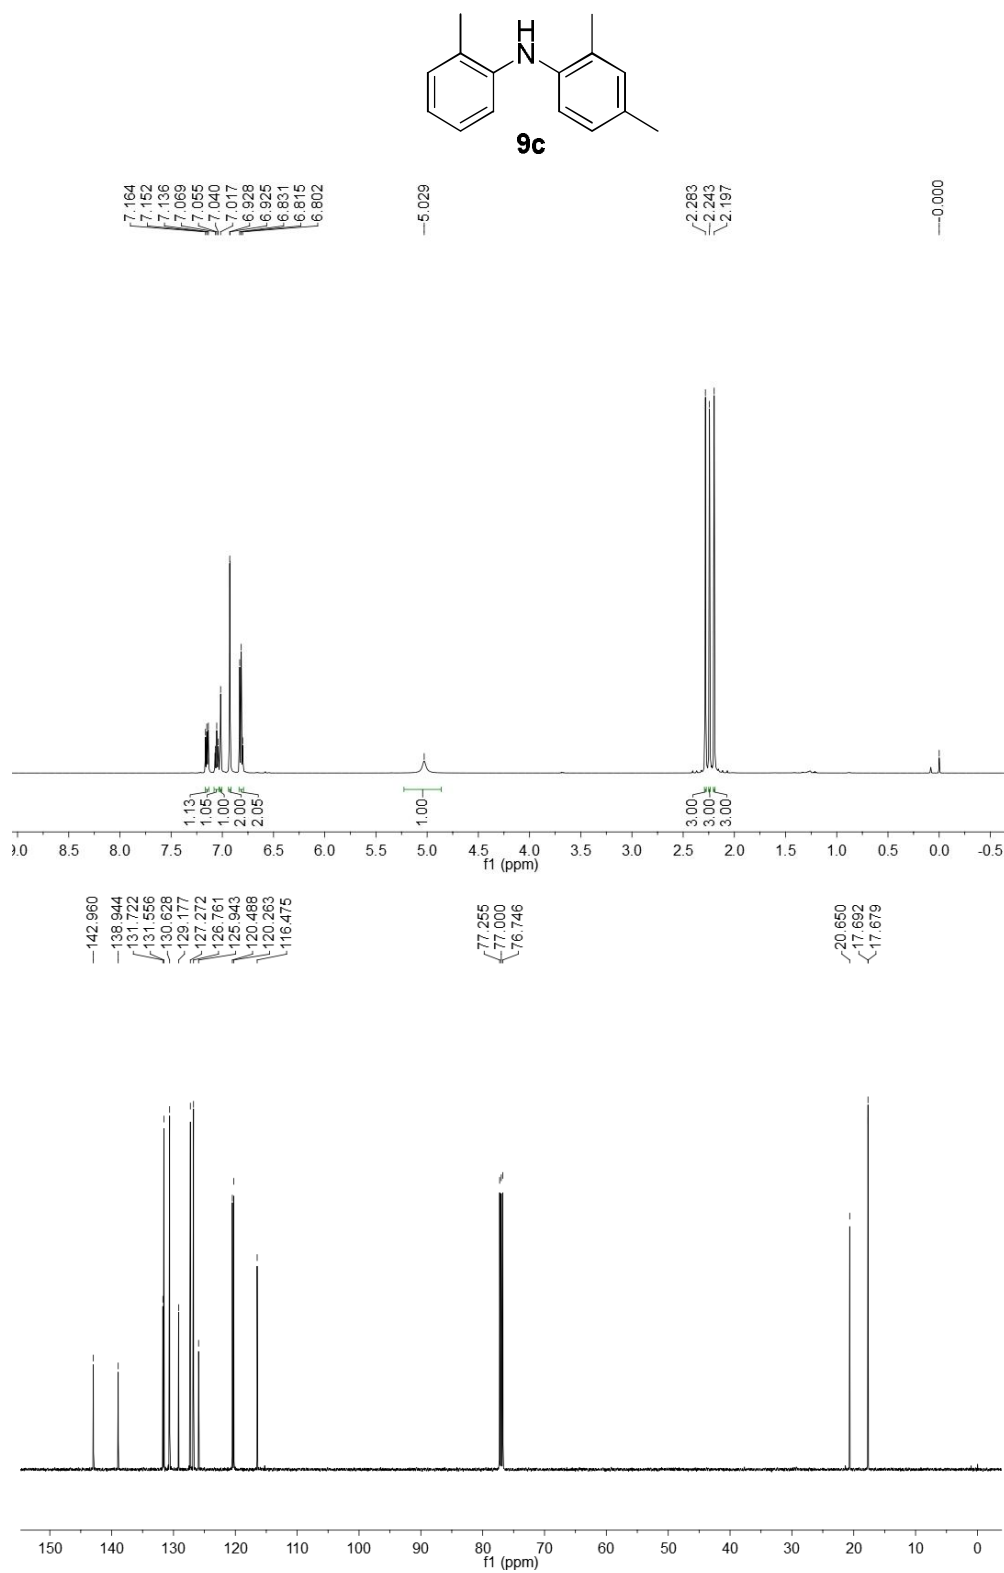

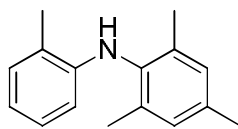

**9d**

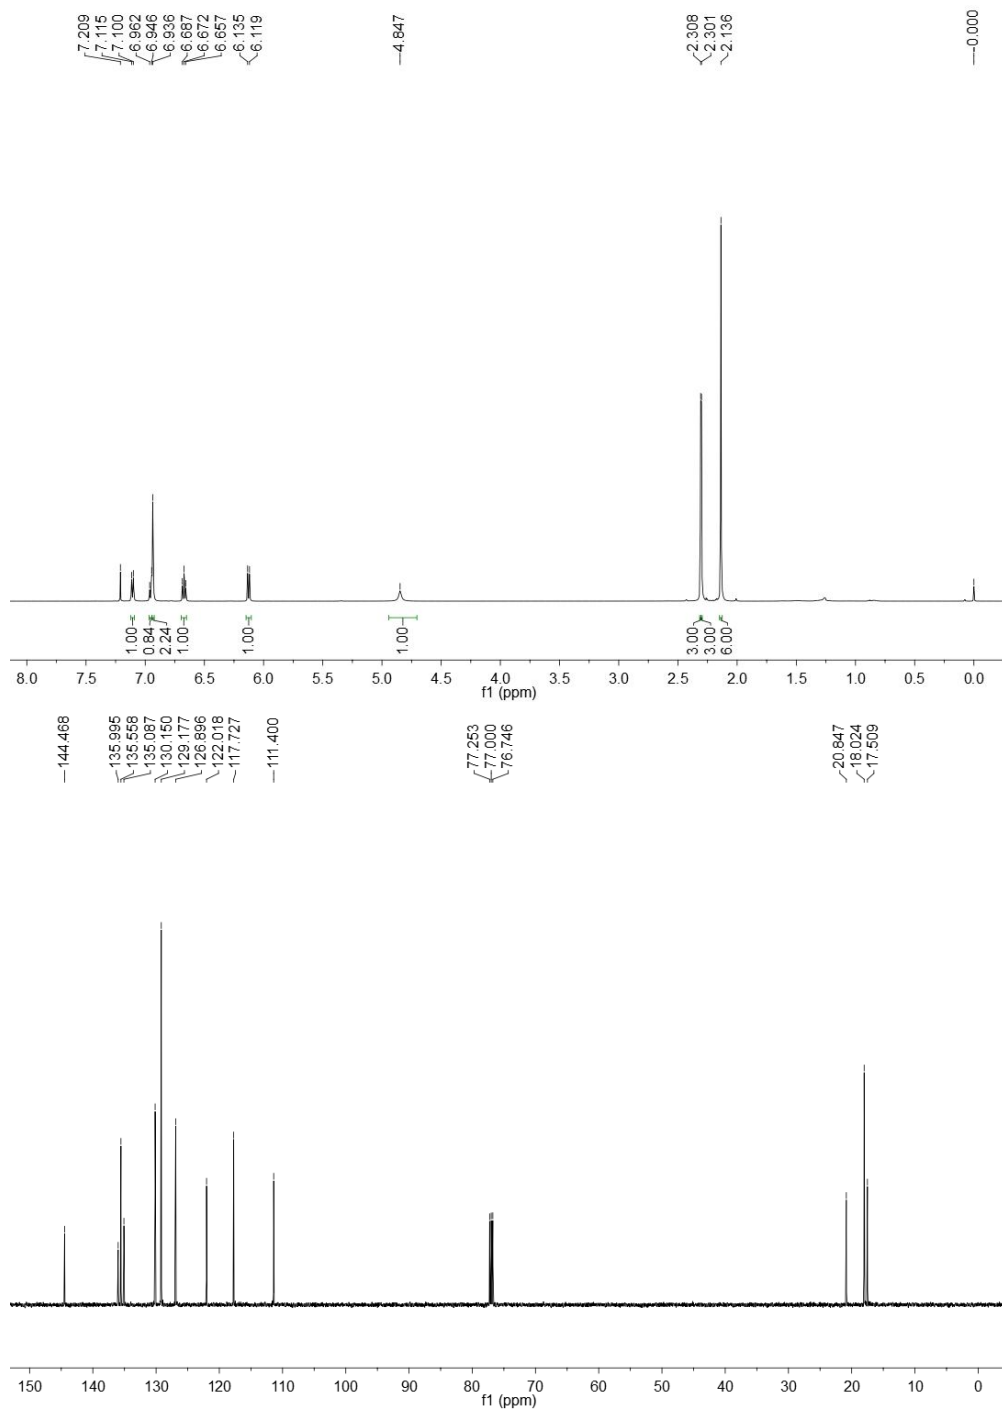



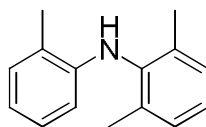

9e

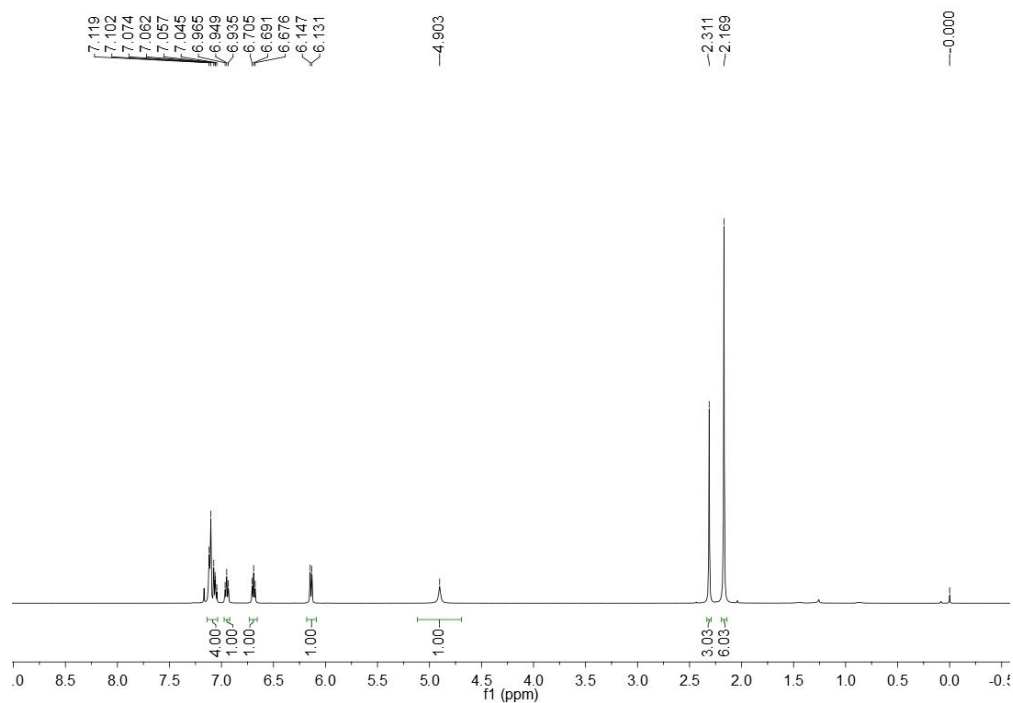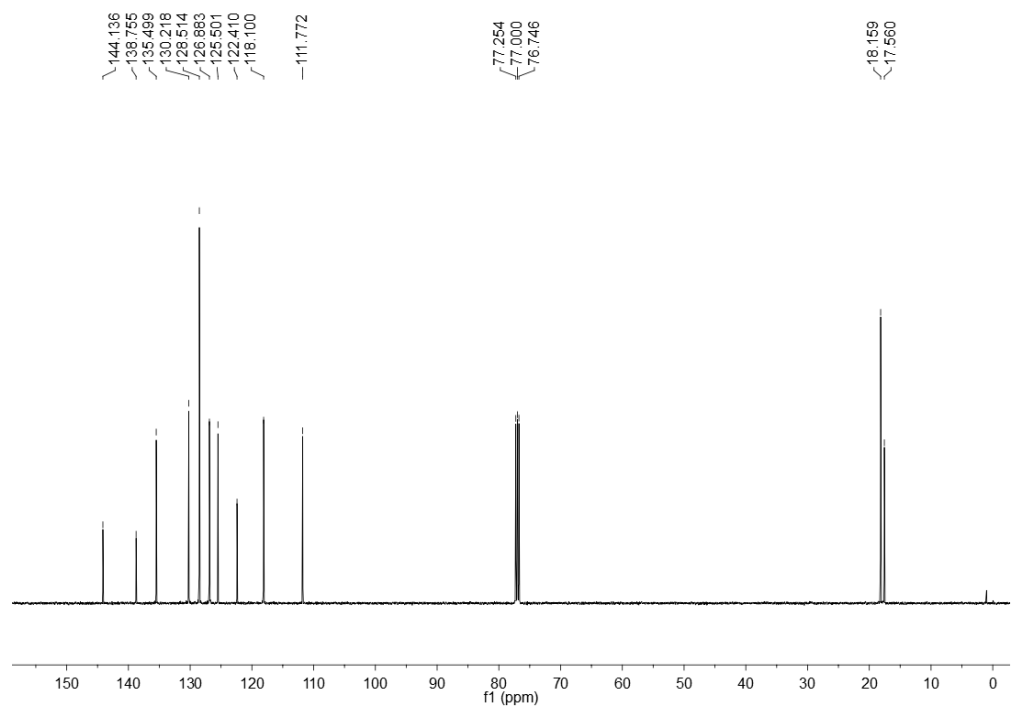

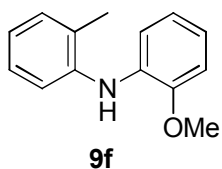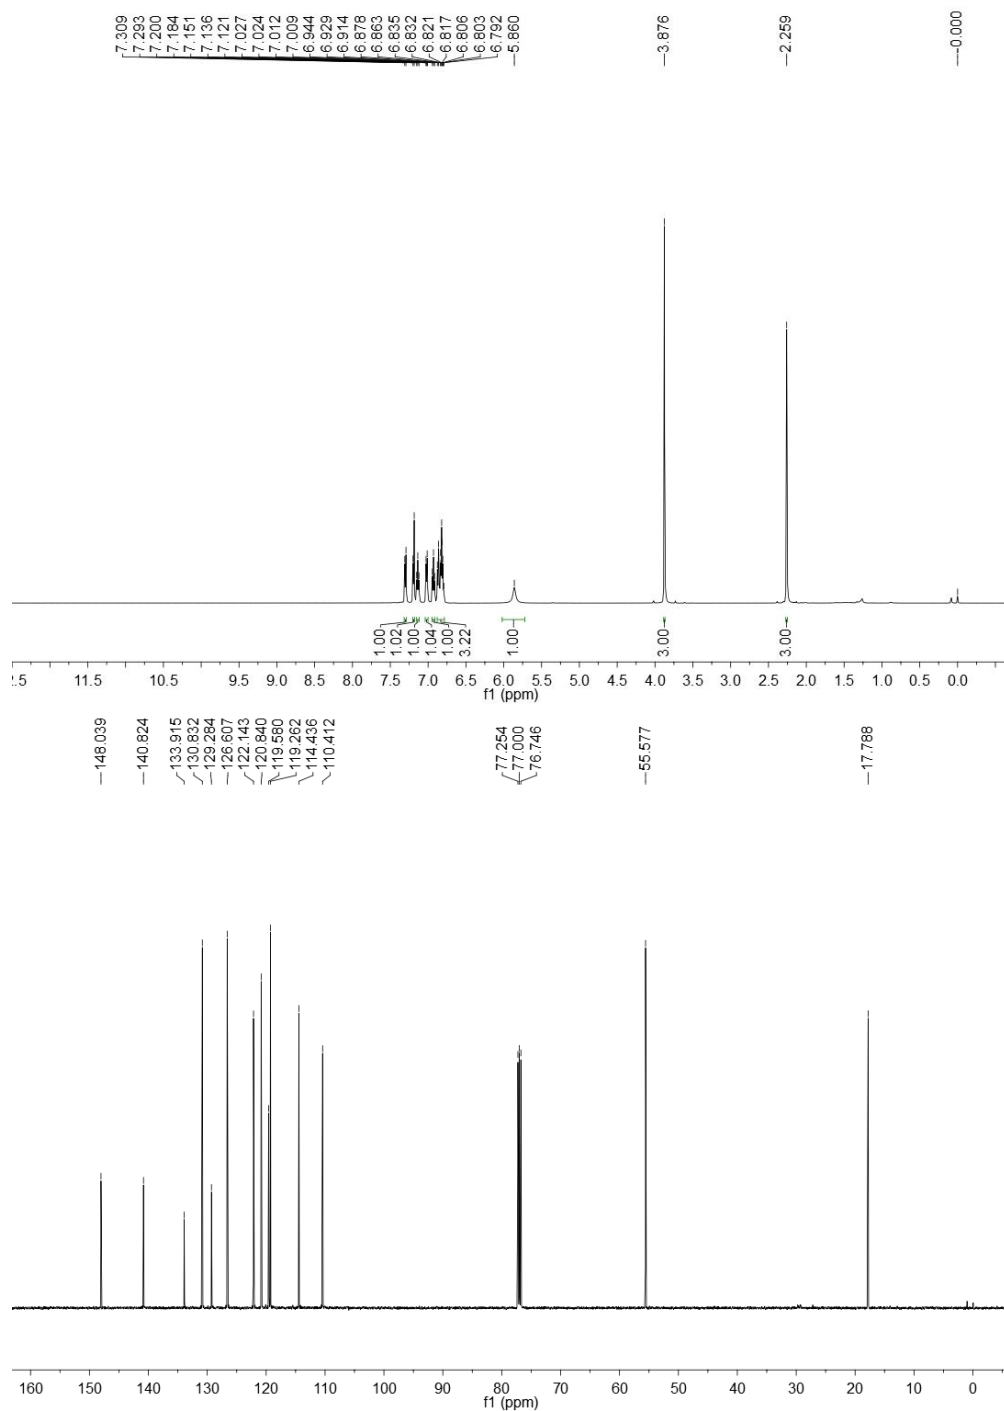

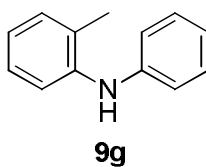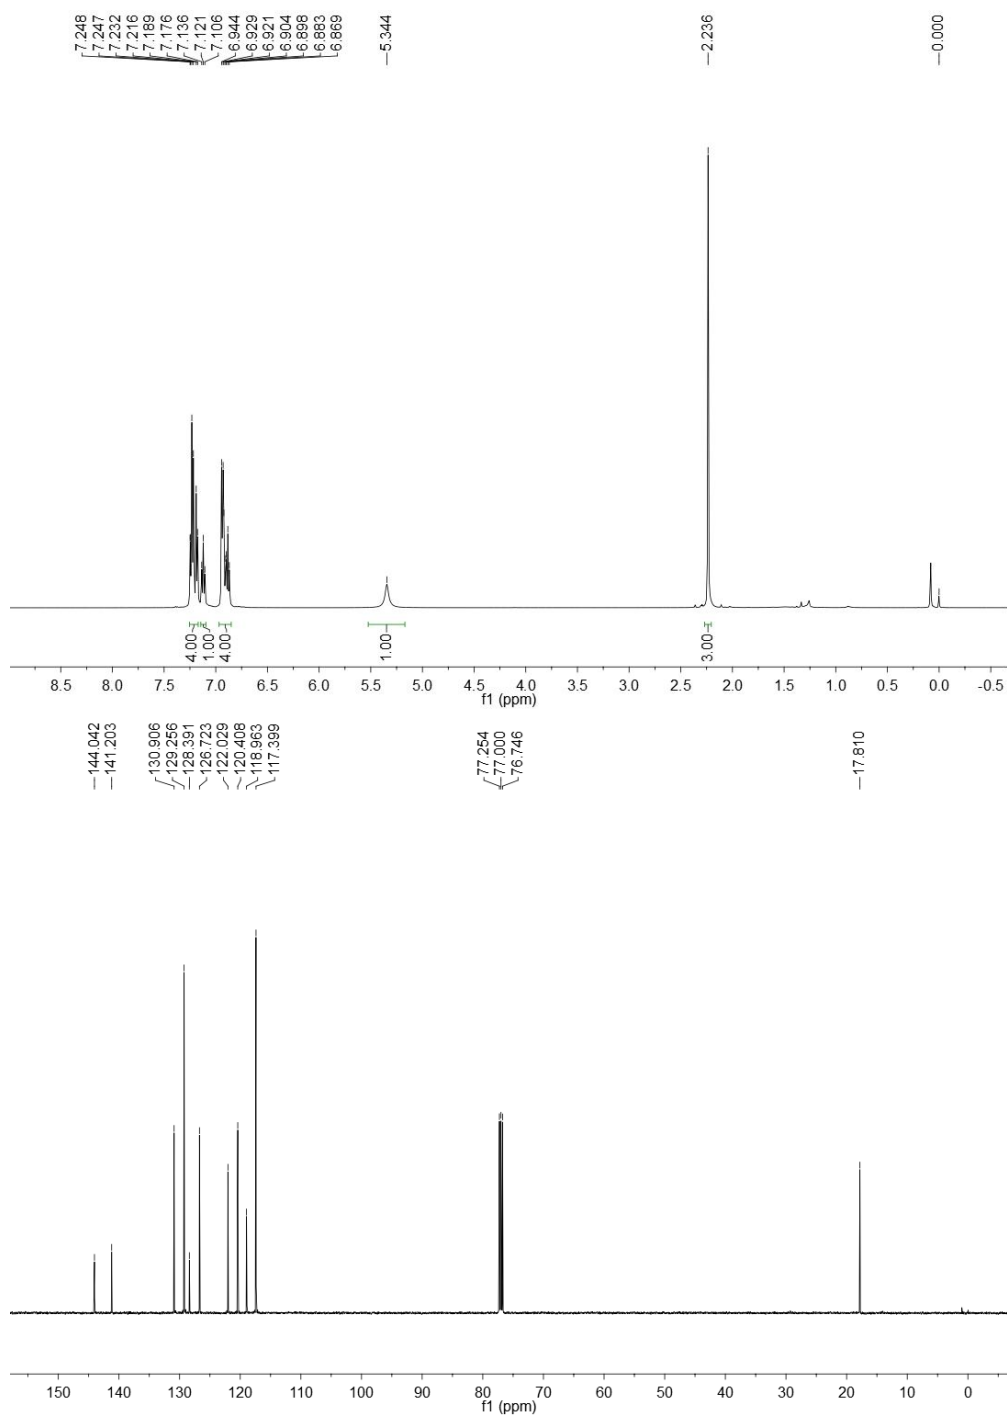

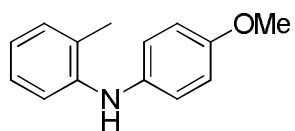

9h

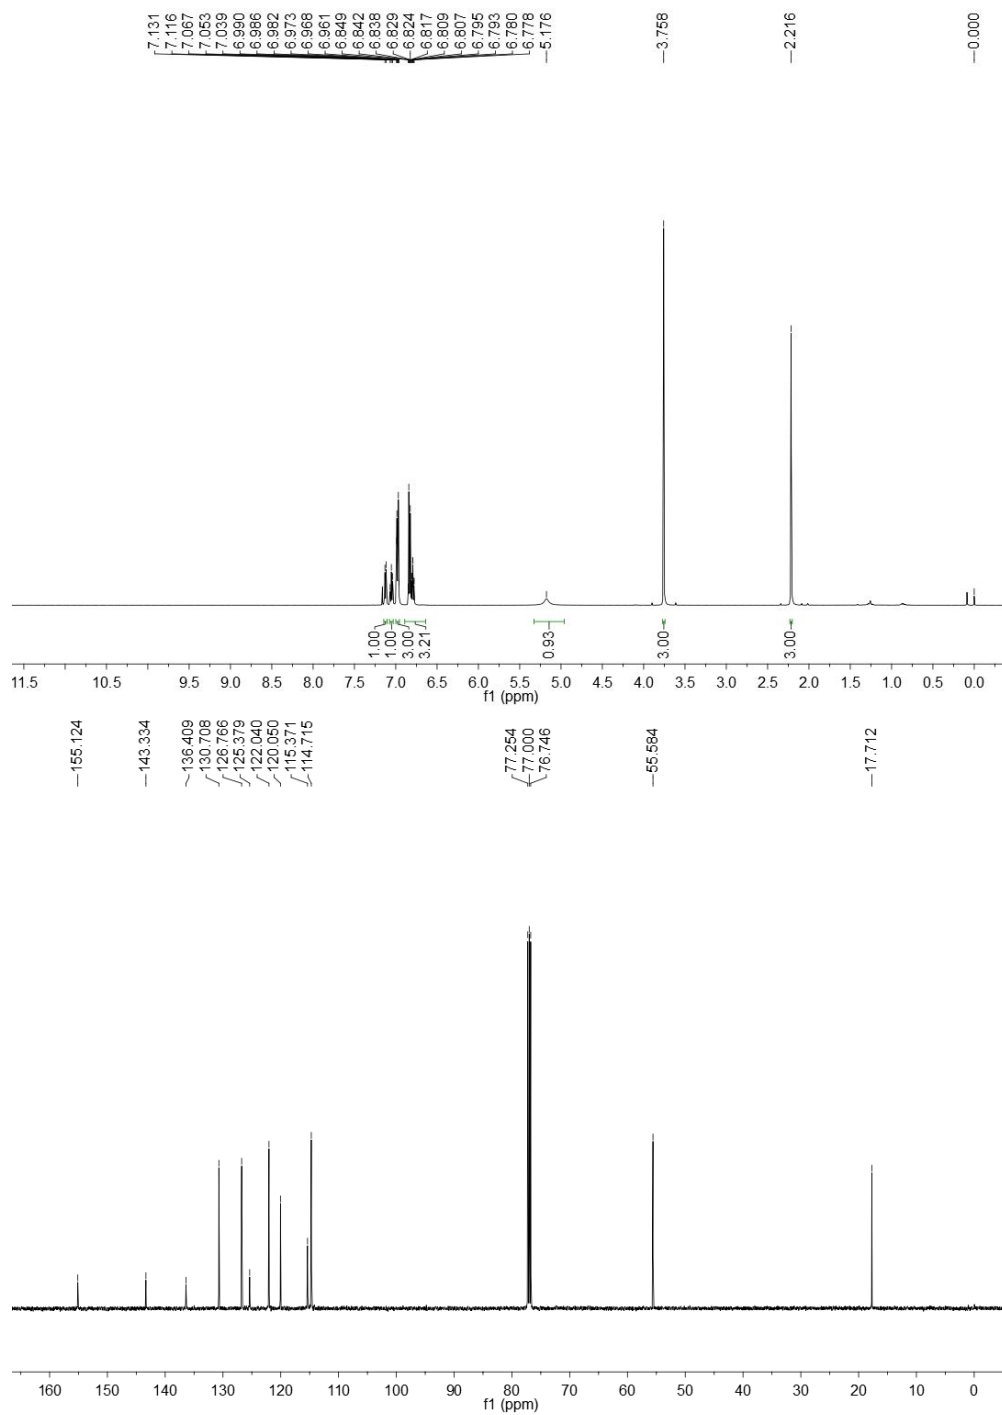

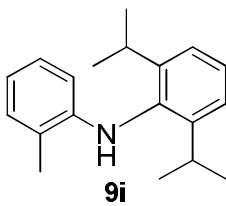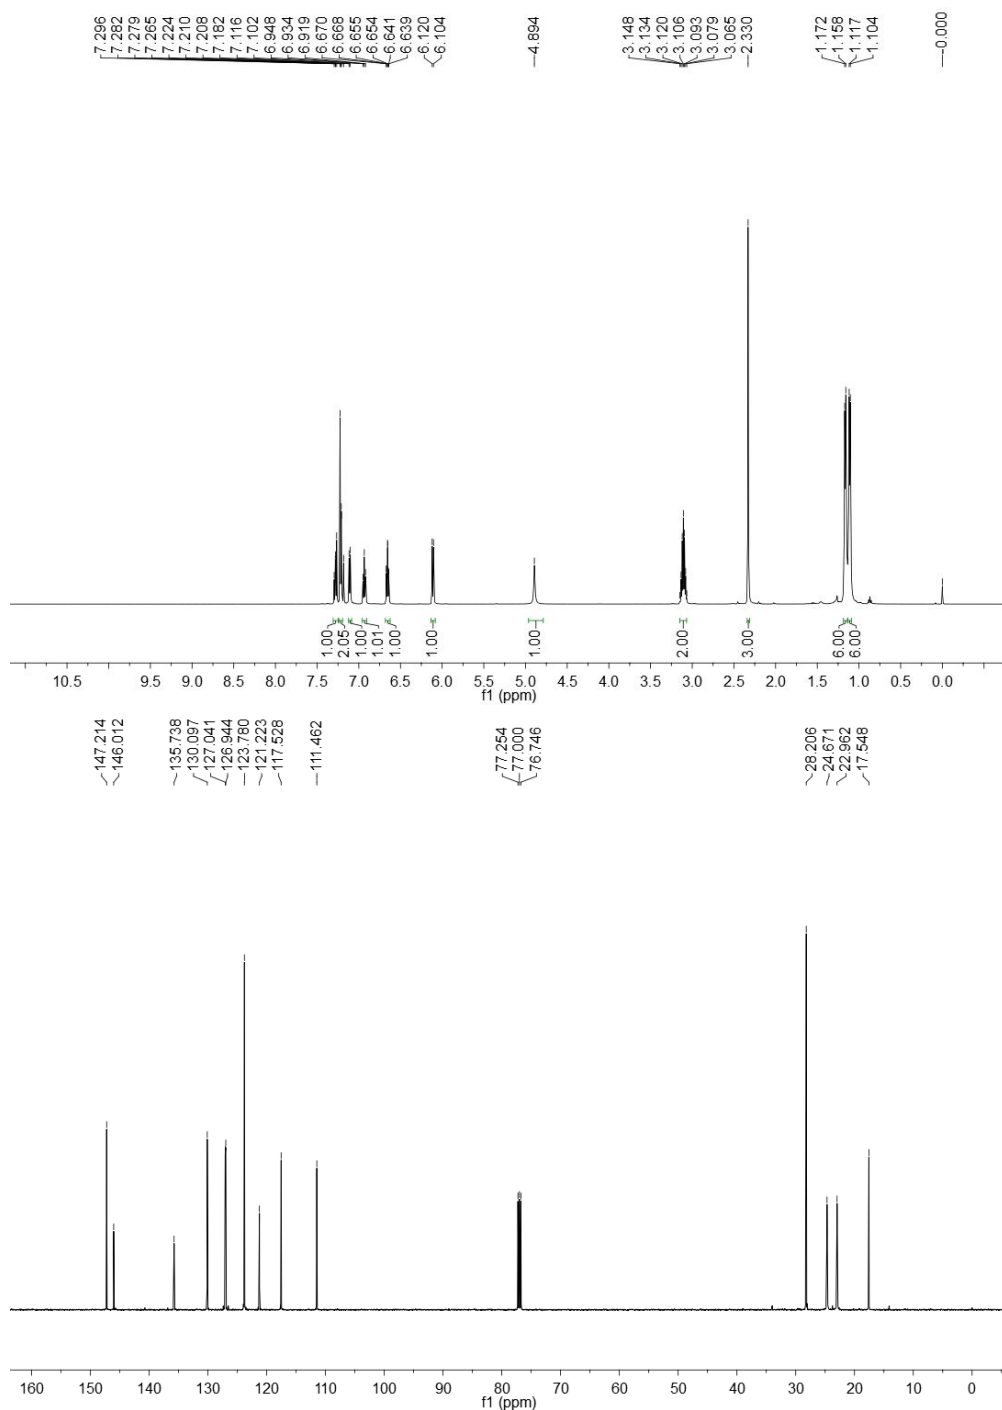

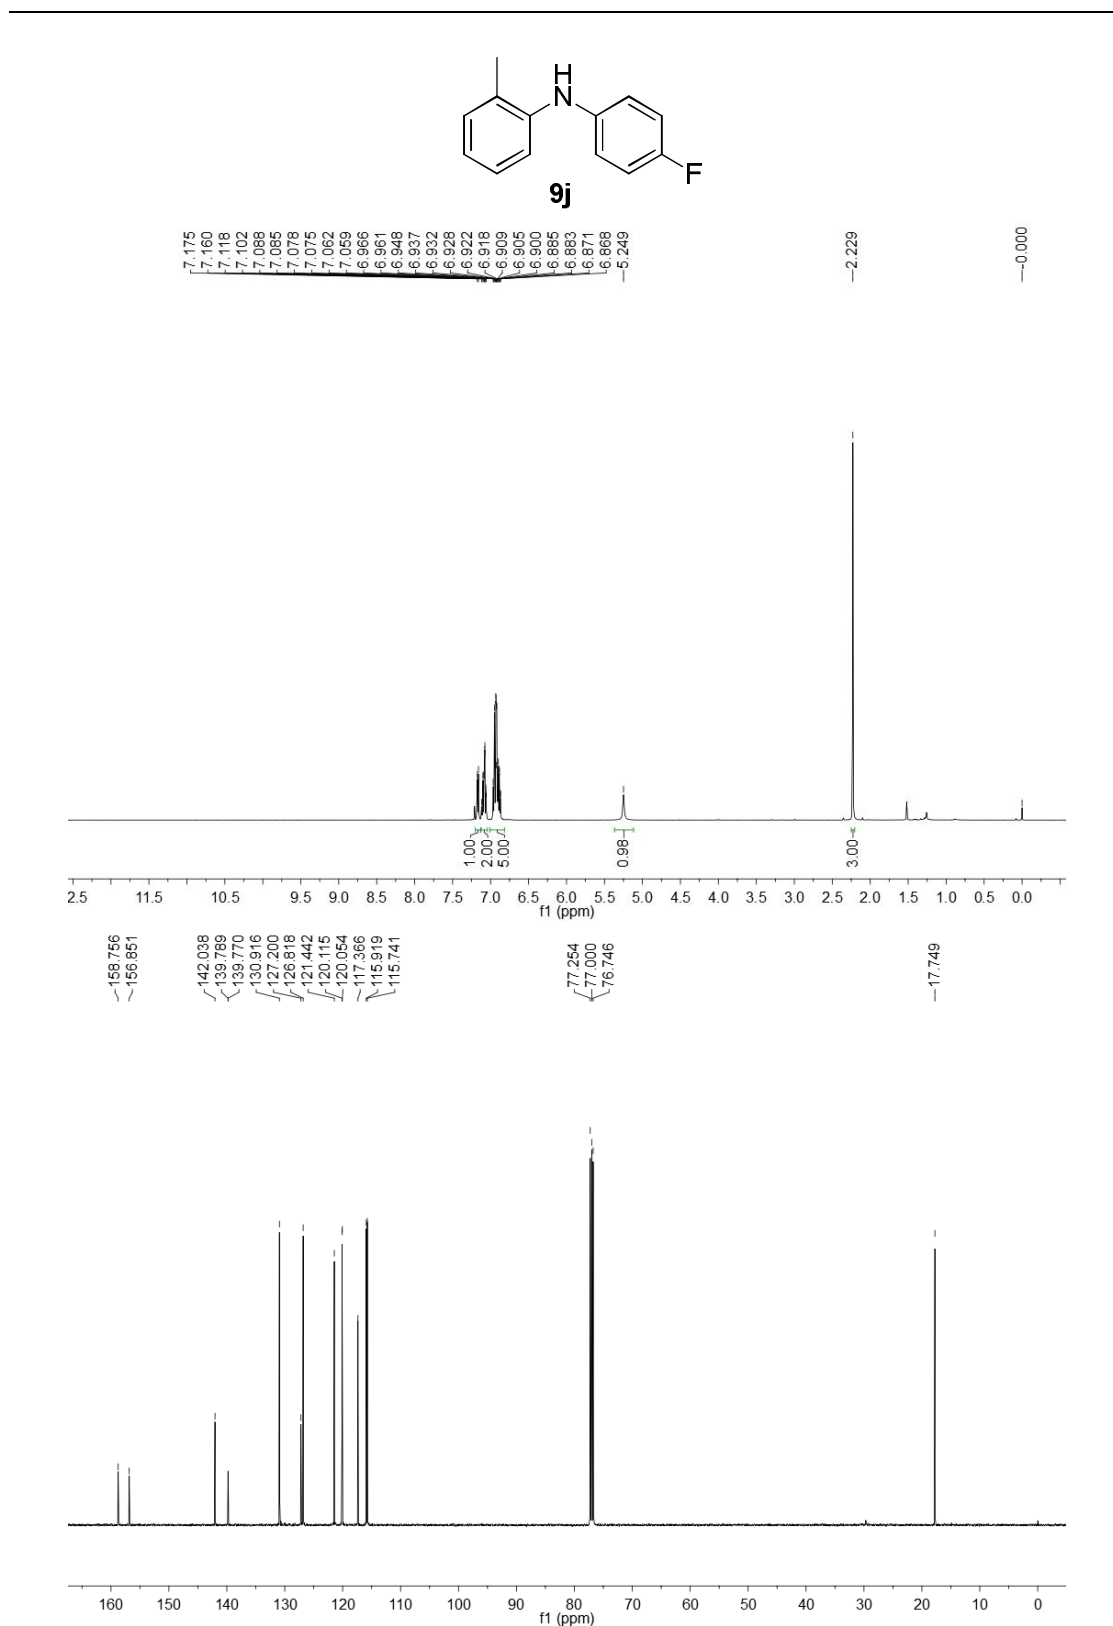

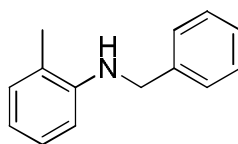

**9k**

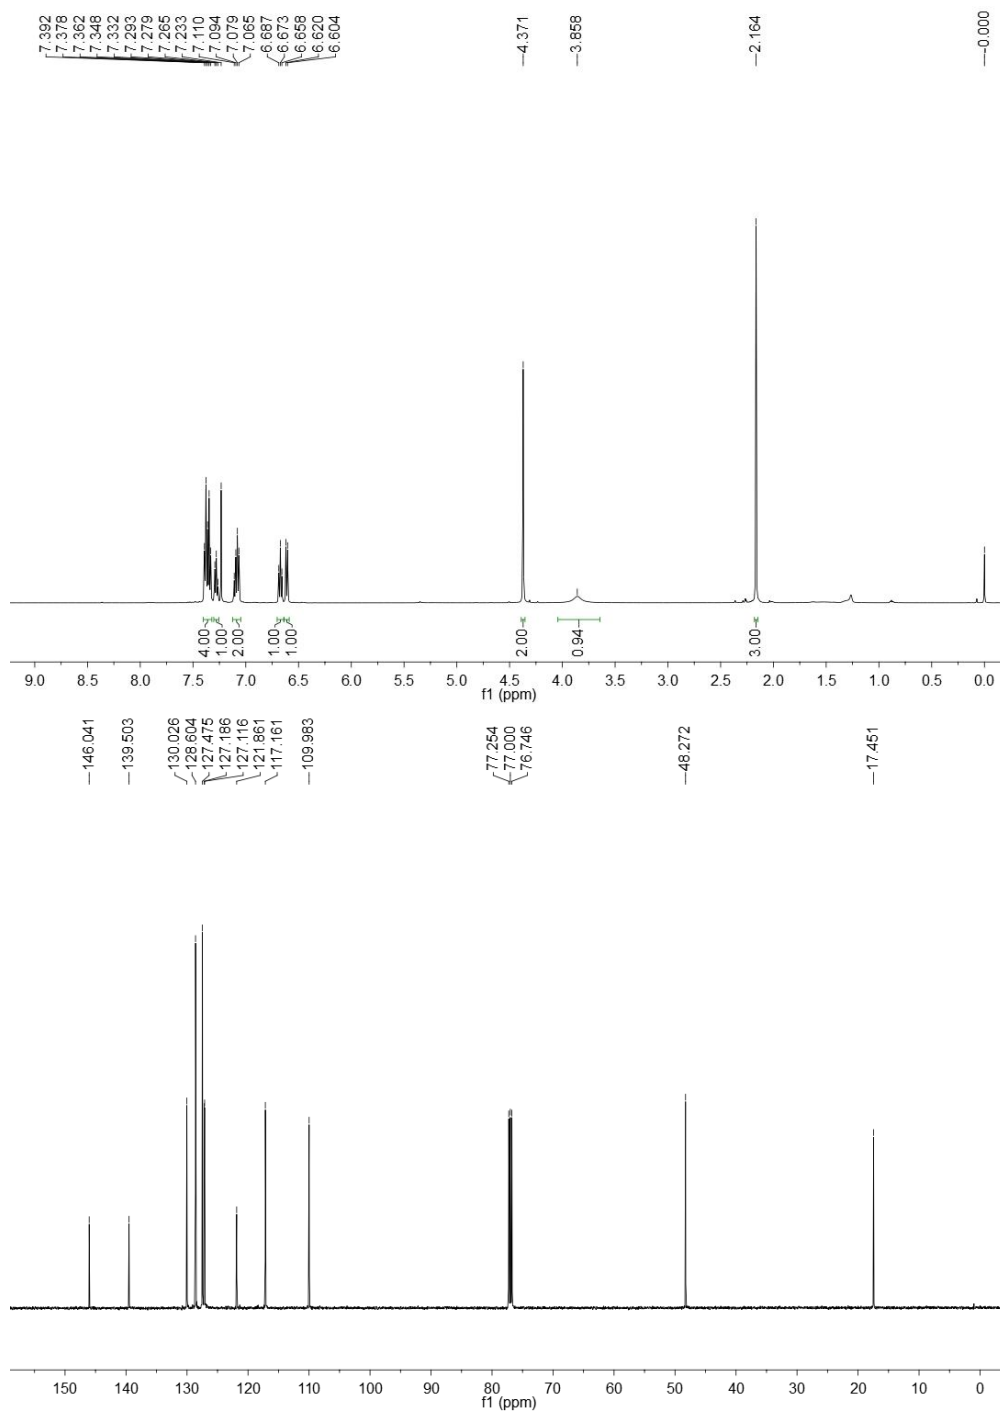

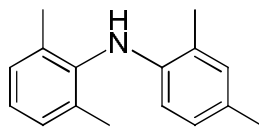

9l

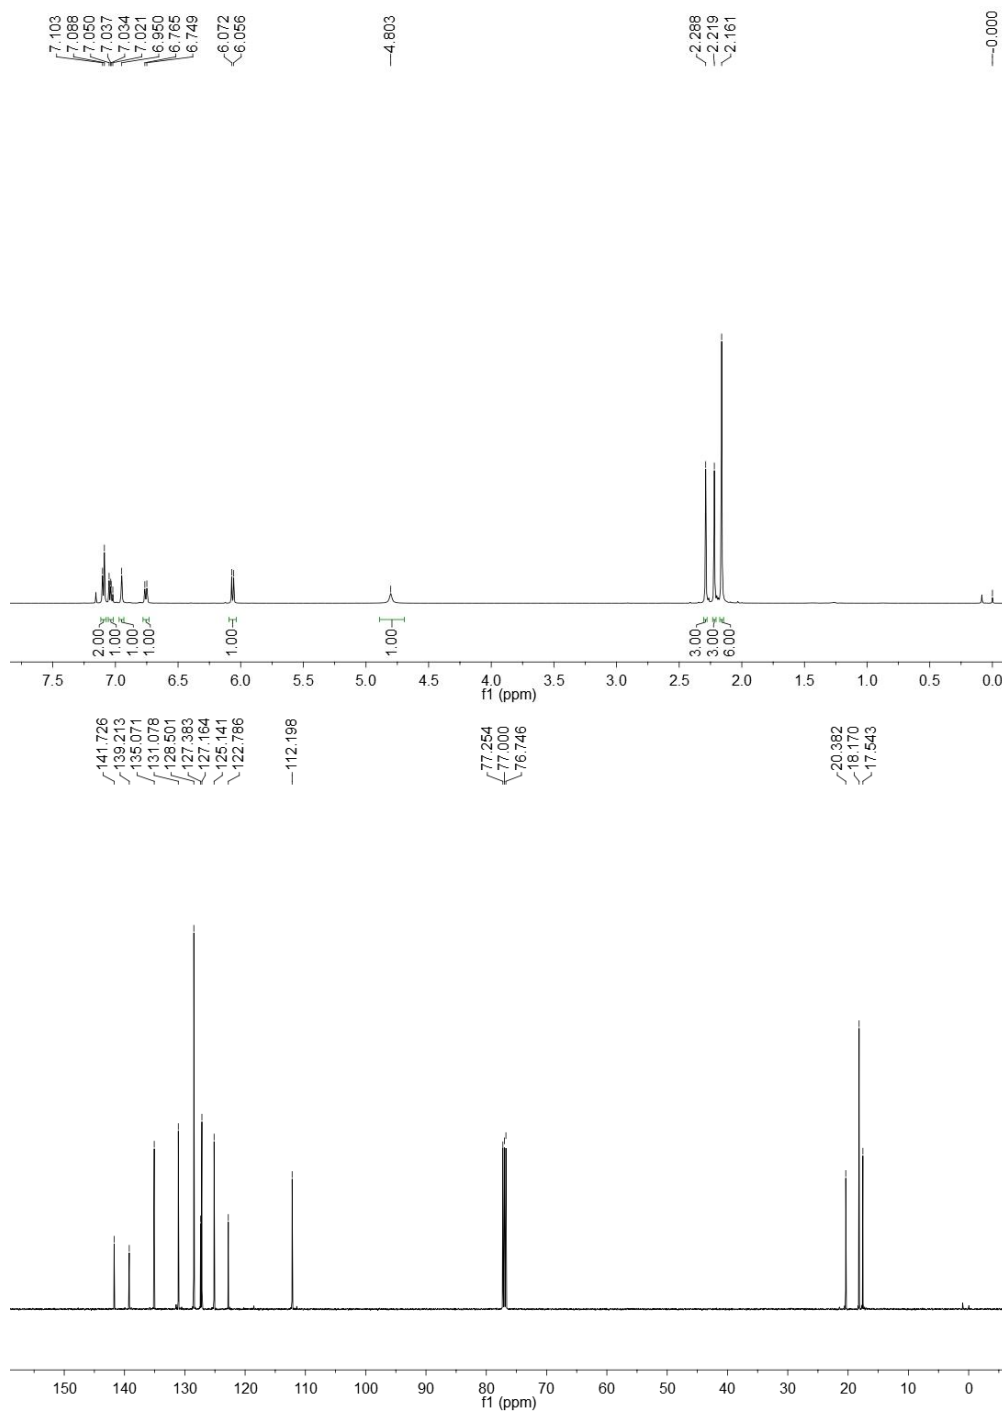



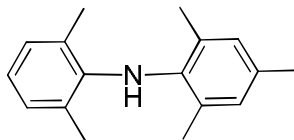

9m

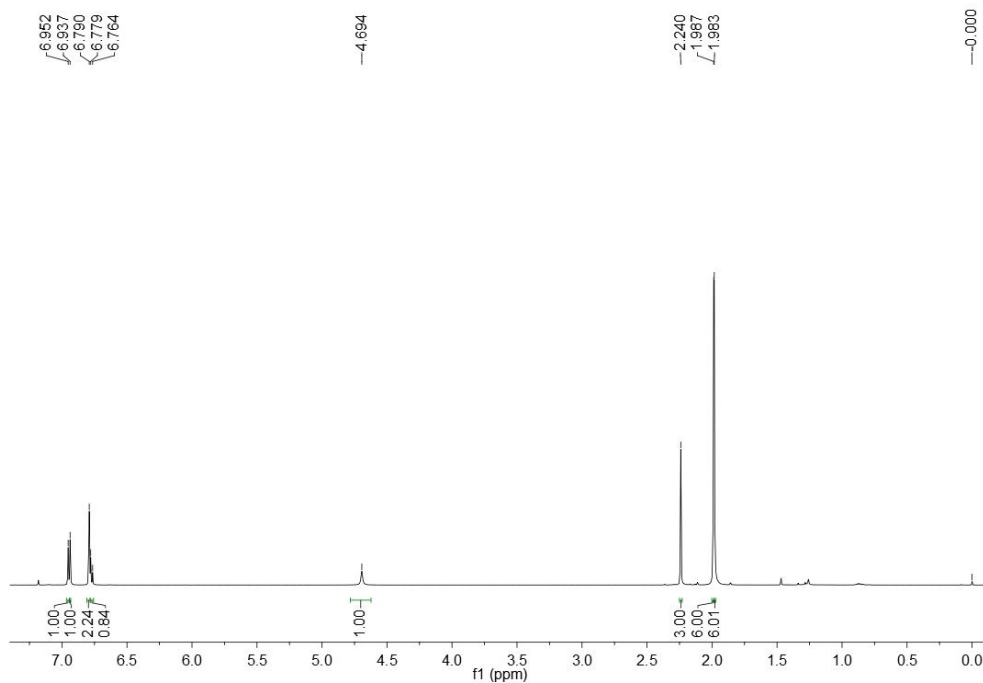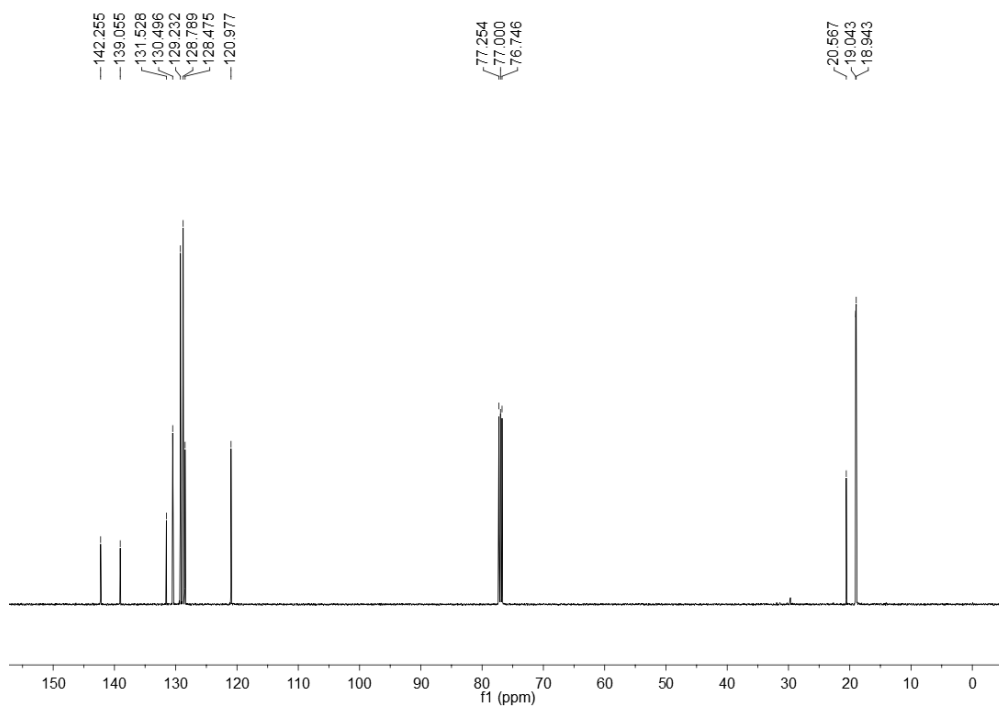

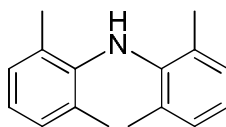

9n

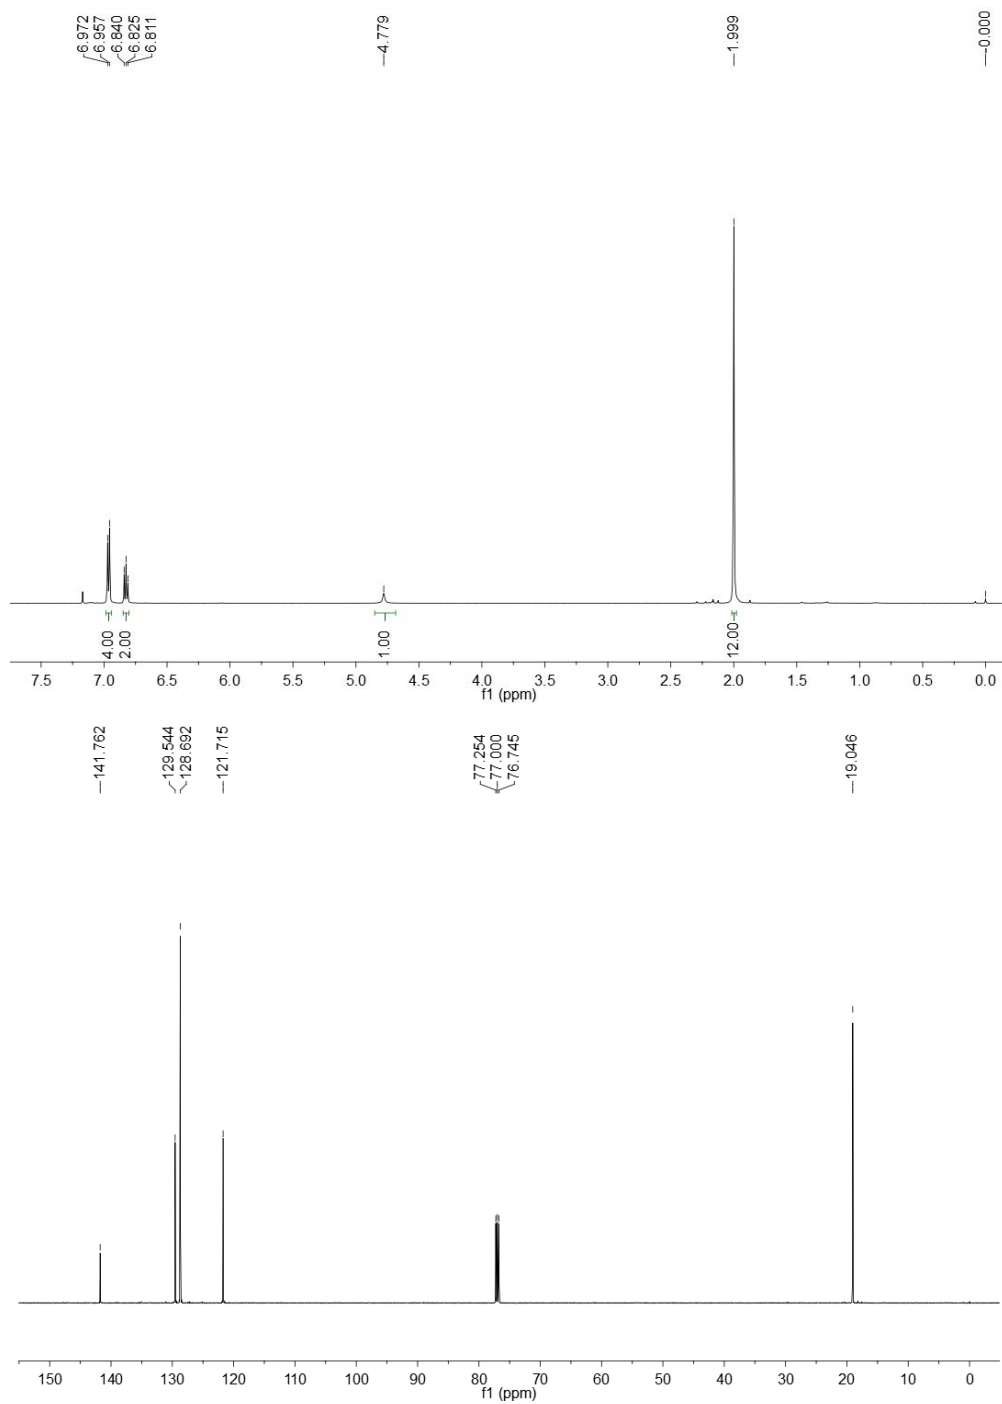

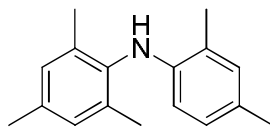

9o

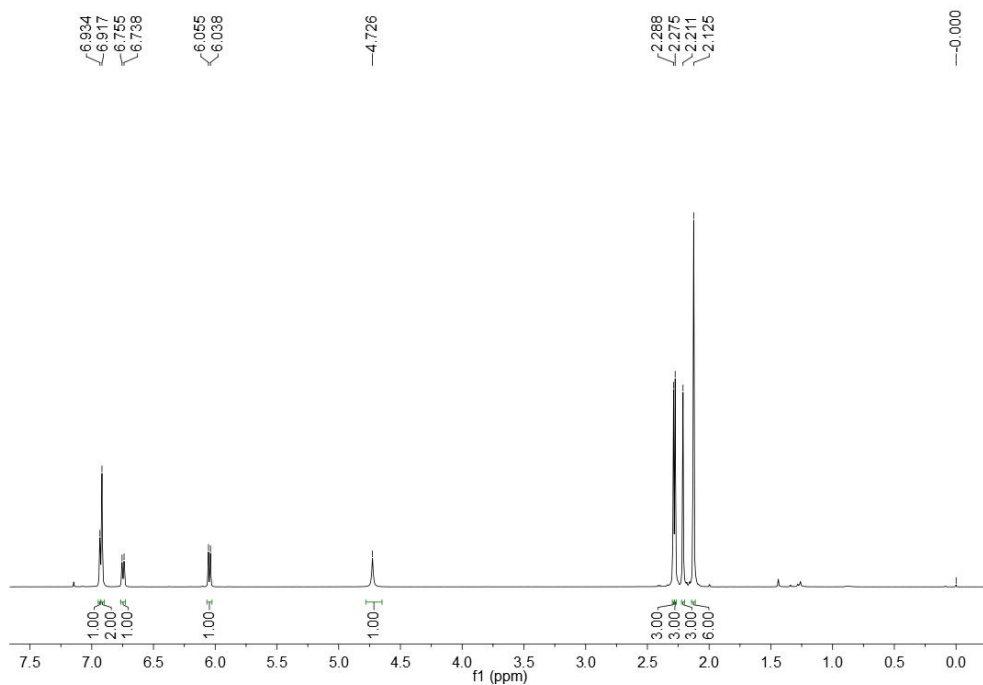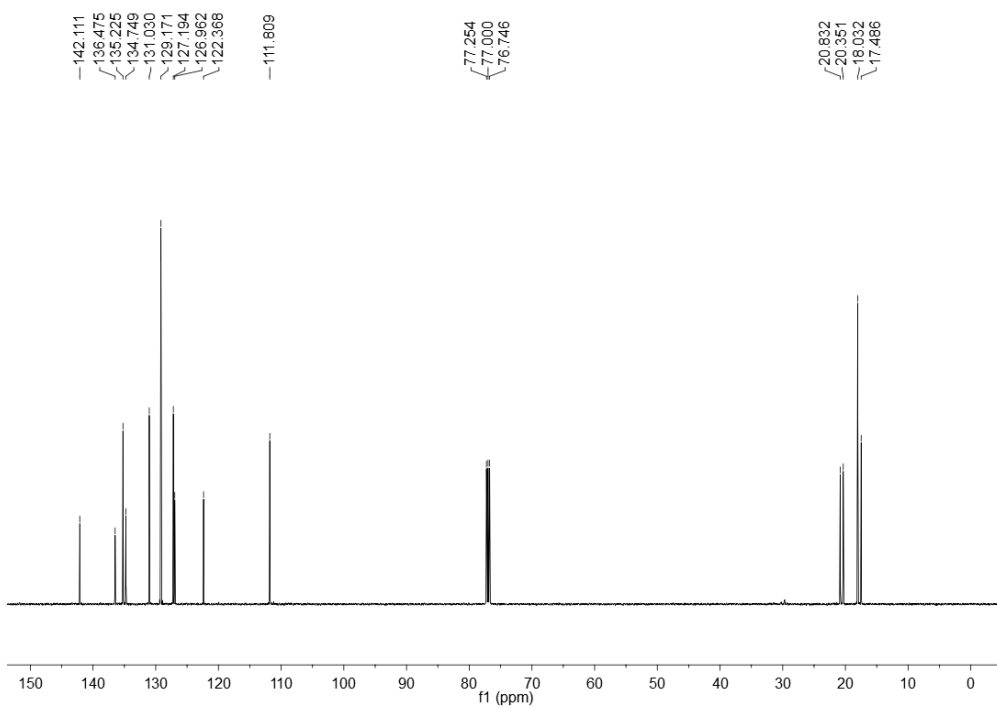

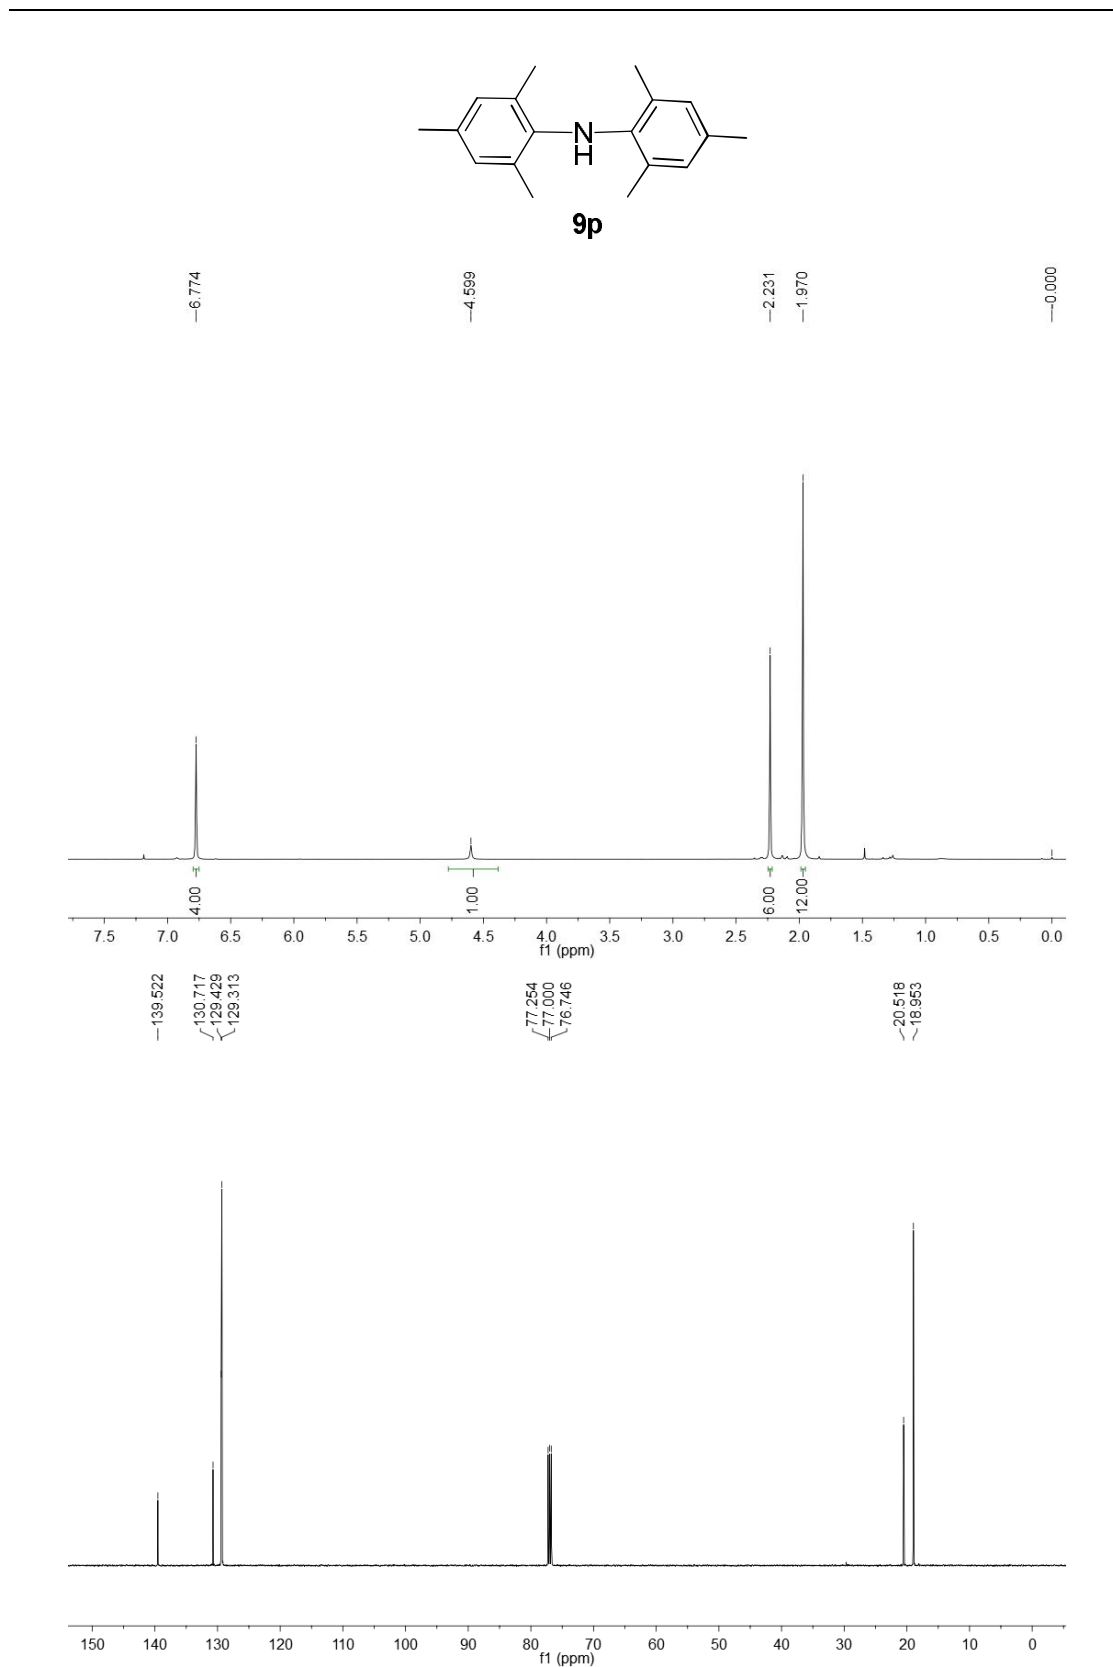

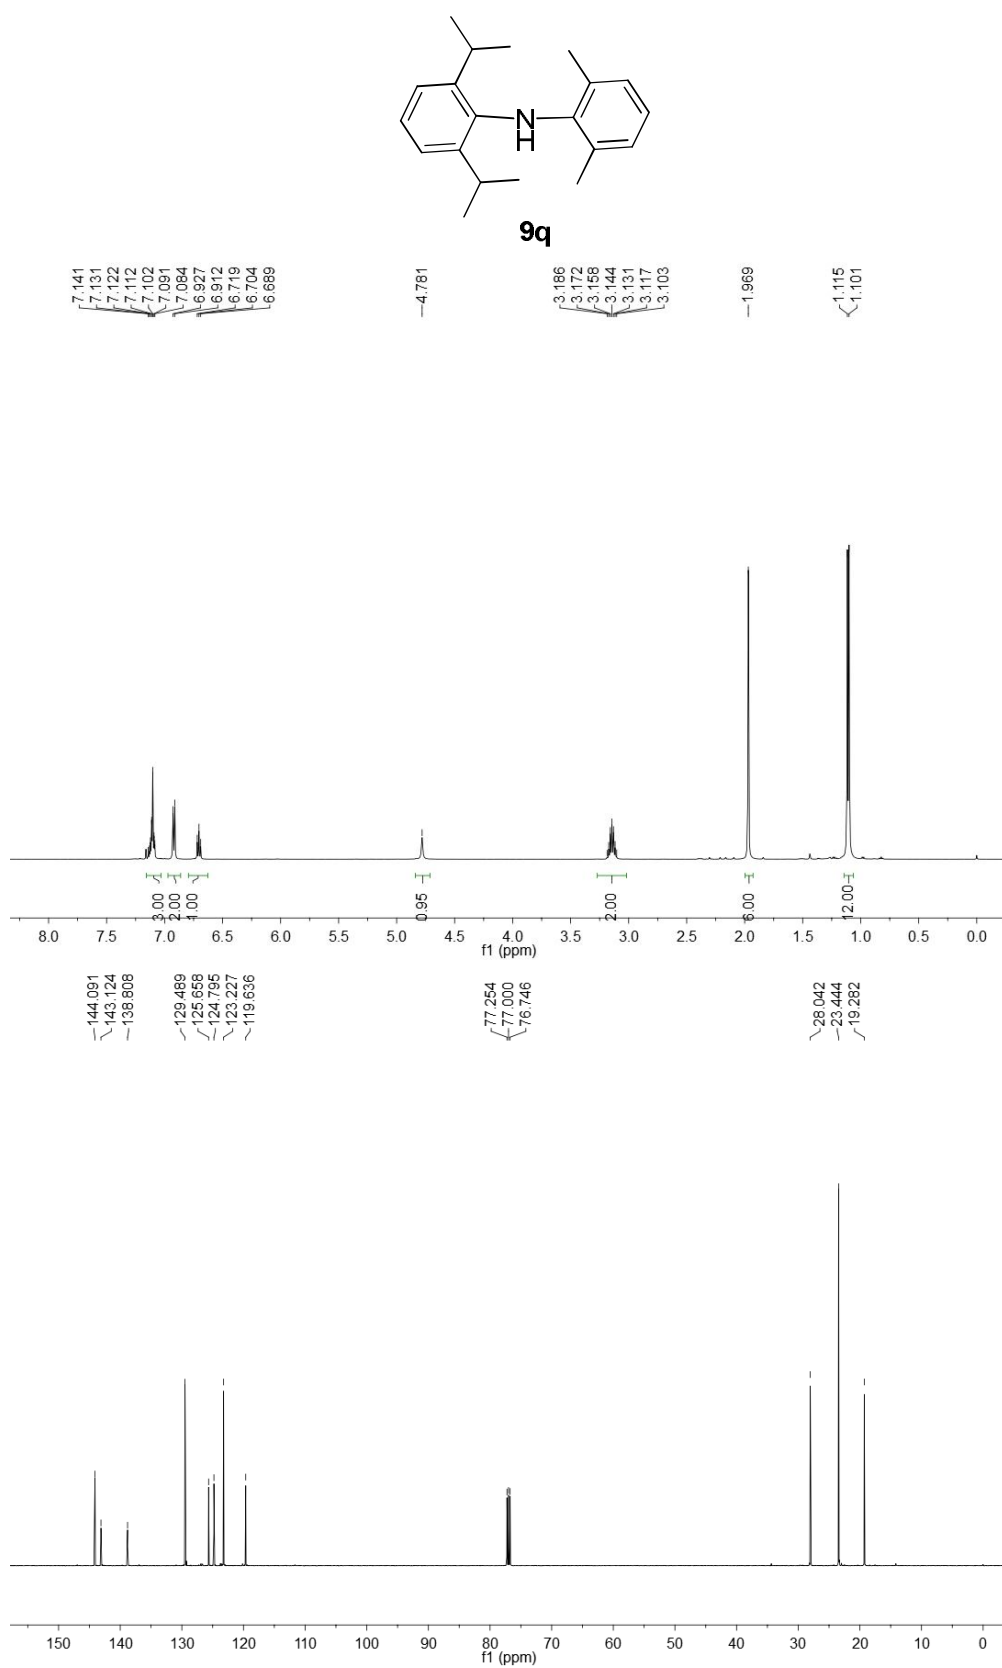

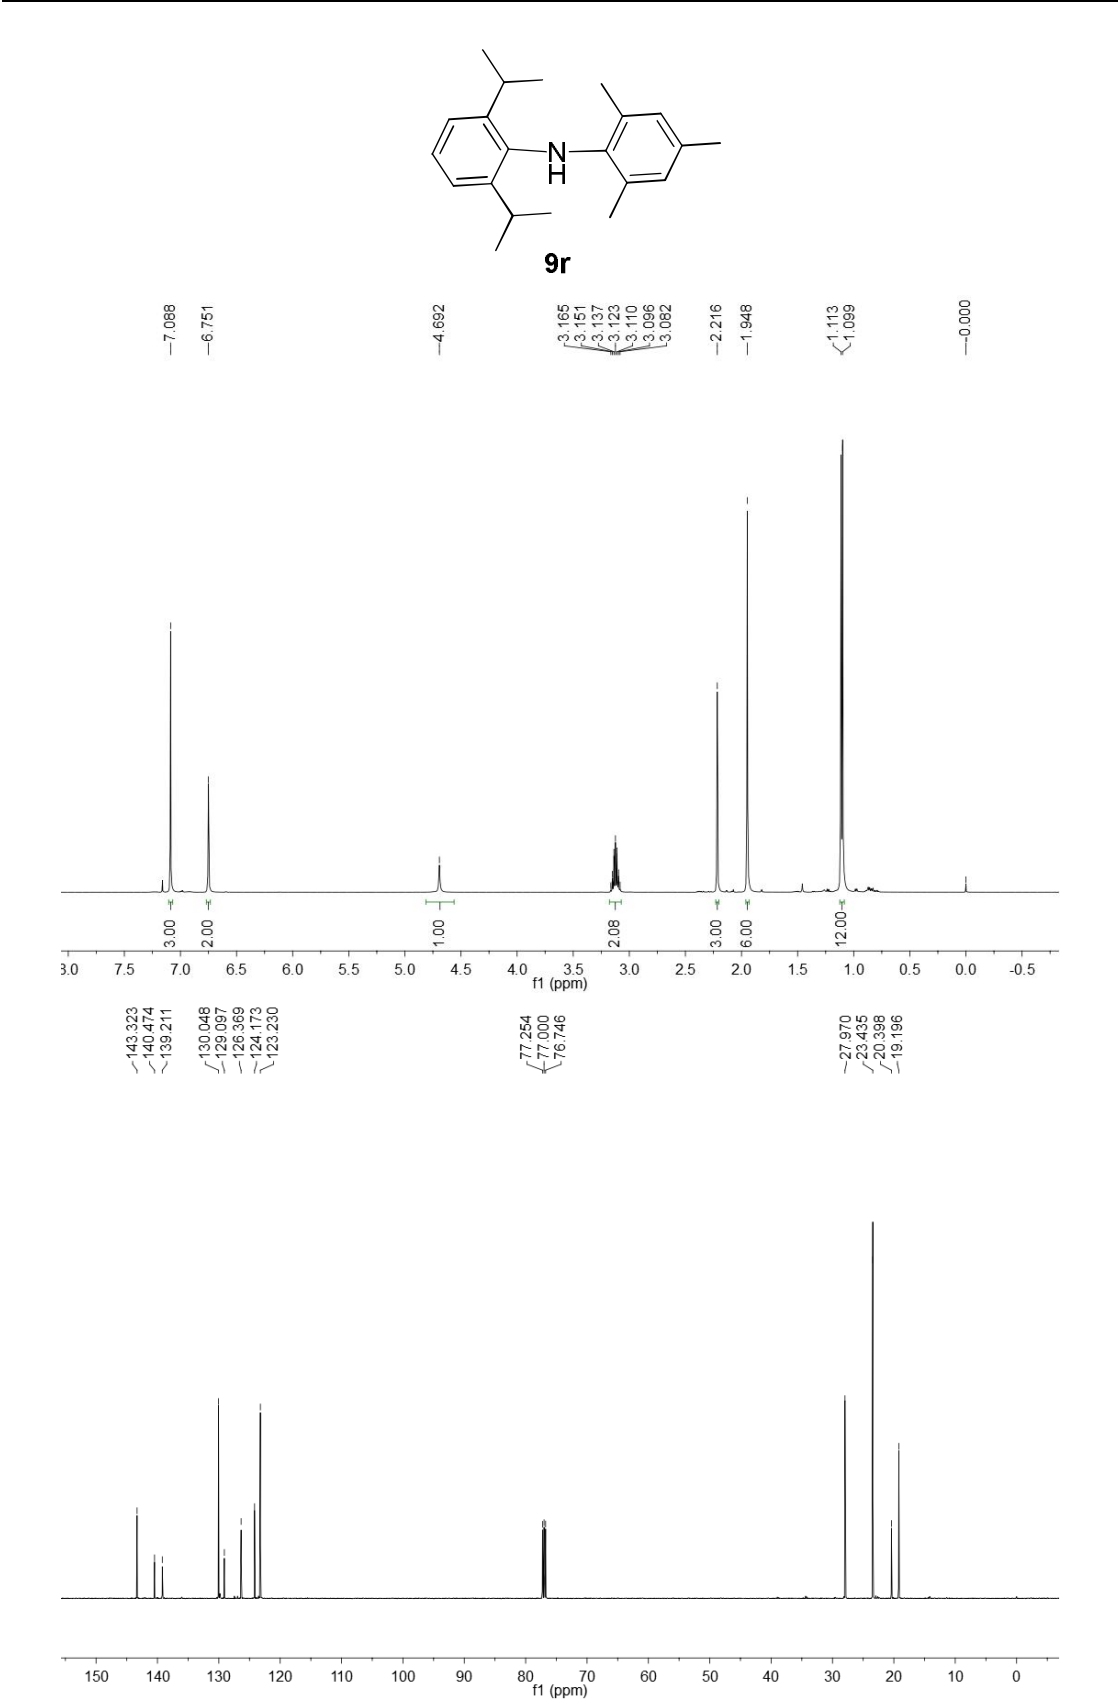

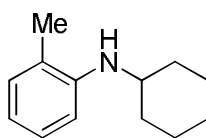

**10a**

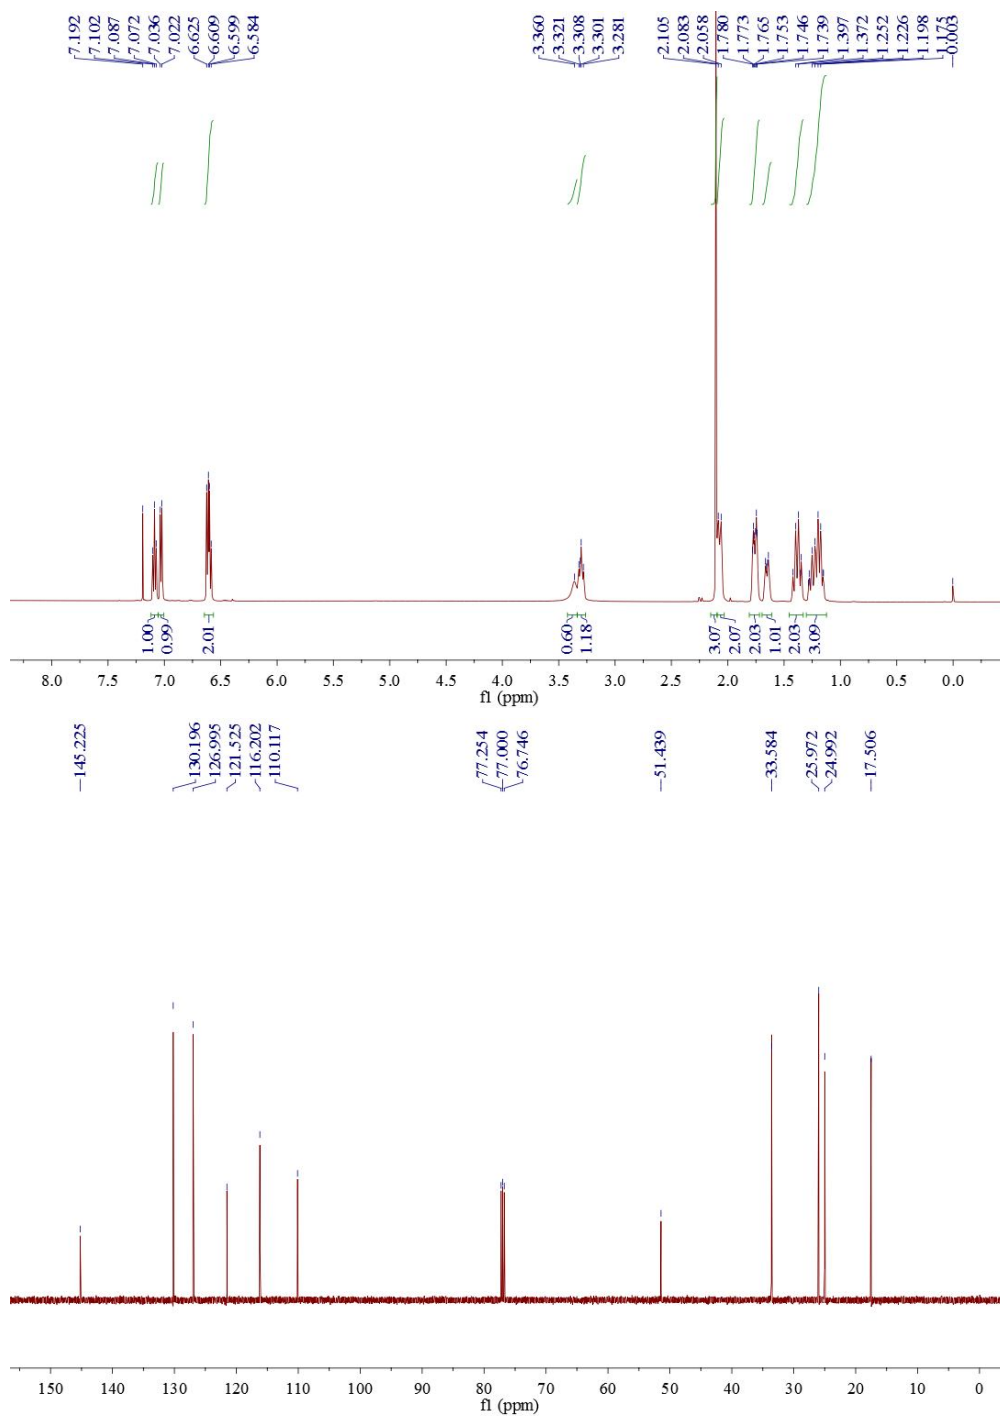

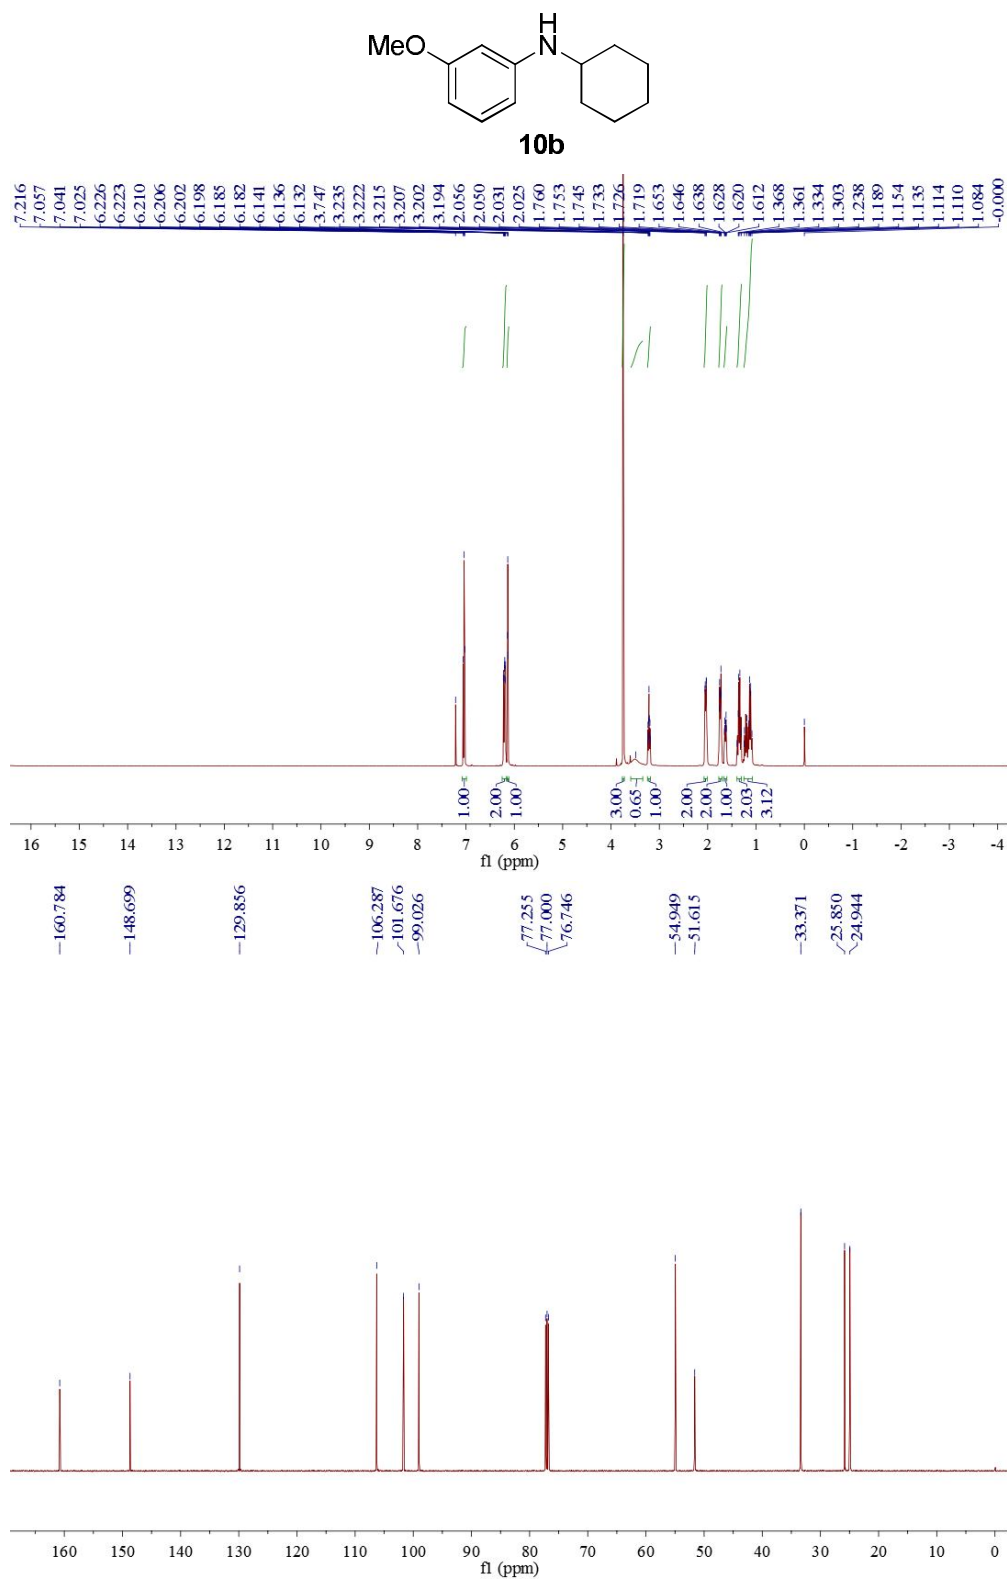



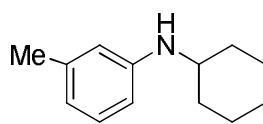

**10c**

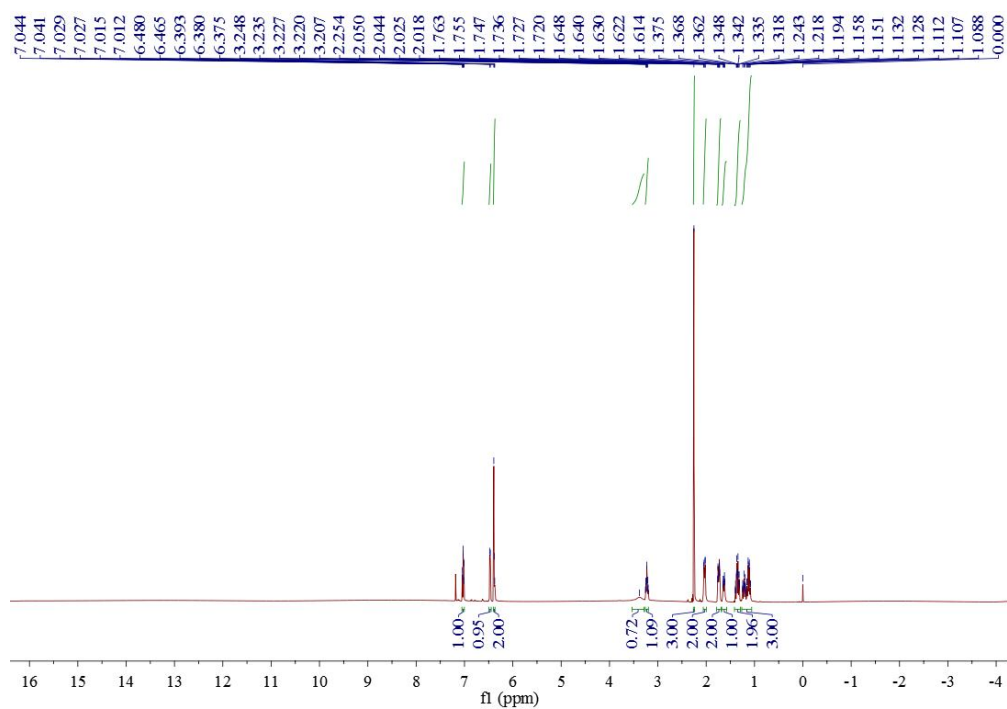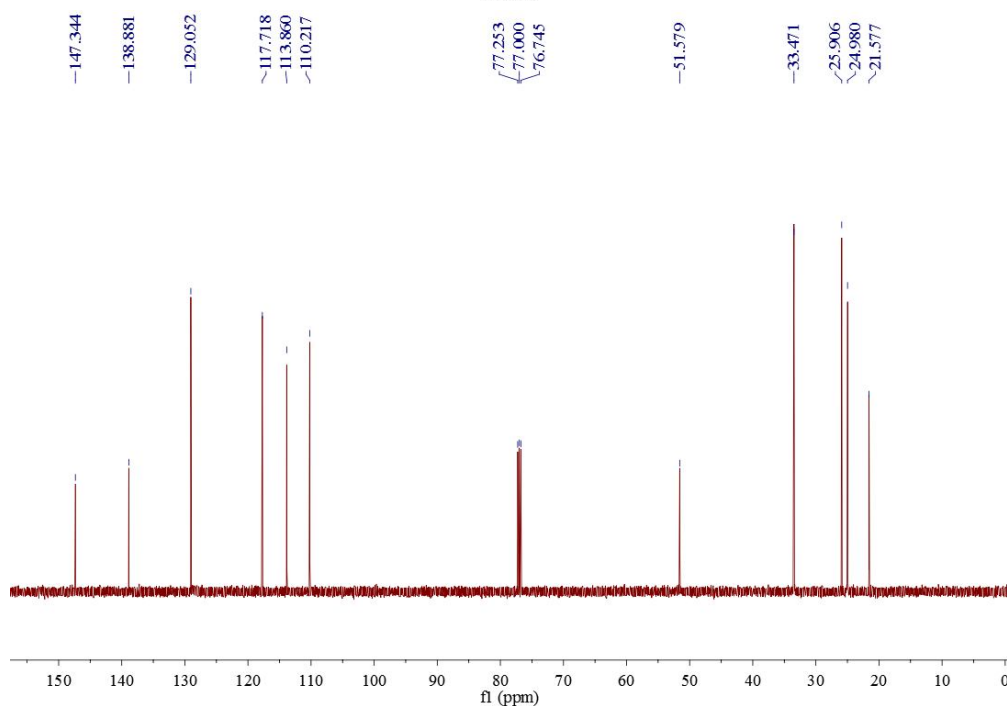

Supplement: c6ob00013d1.pdf [file c6ob00013d1.pdf]
